# Supplementary material for: Prediction significance of autophagy-related genes in survival probability and drug resistance in diffuse large B-cell lymphoma
Source: Aging (Albany NY). 2024 Jan 17;16(2):1049–76. doi: 10.18632/aging.205282 (PMC10866451; doi:10.18632/aging.205282)
Supplement: Supplementary Figures [file aging-16-205282-s001.pdf]

SUPPLEMENTARY FIGURES

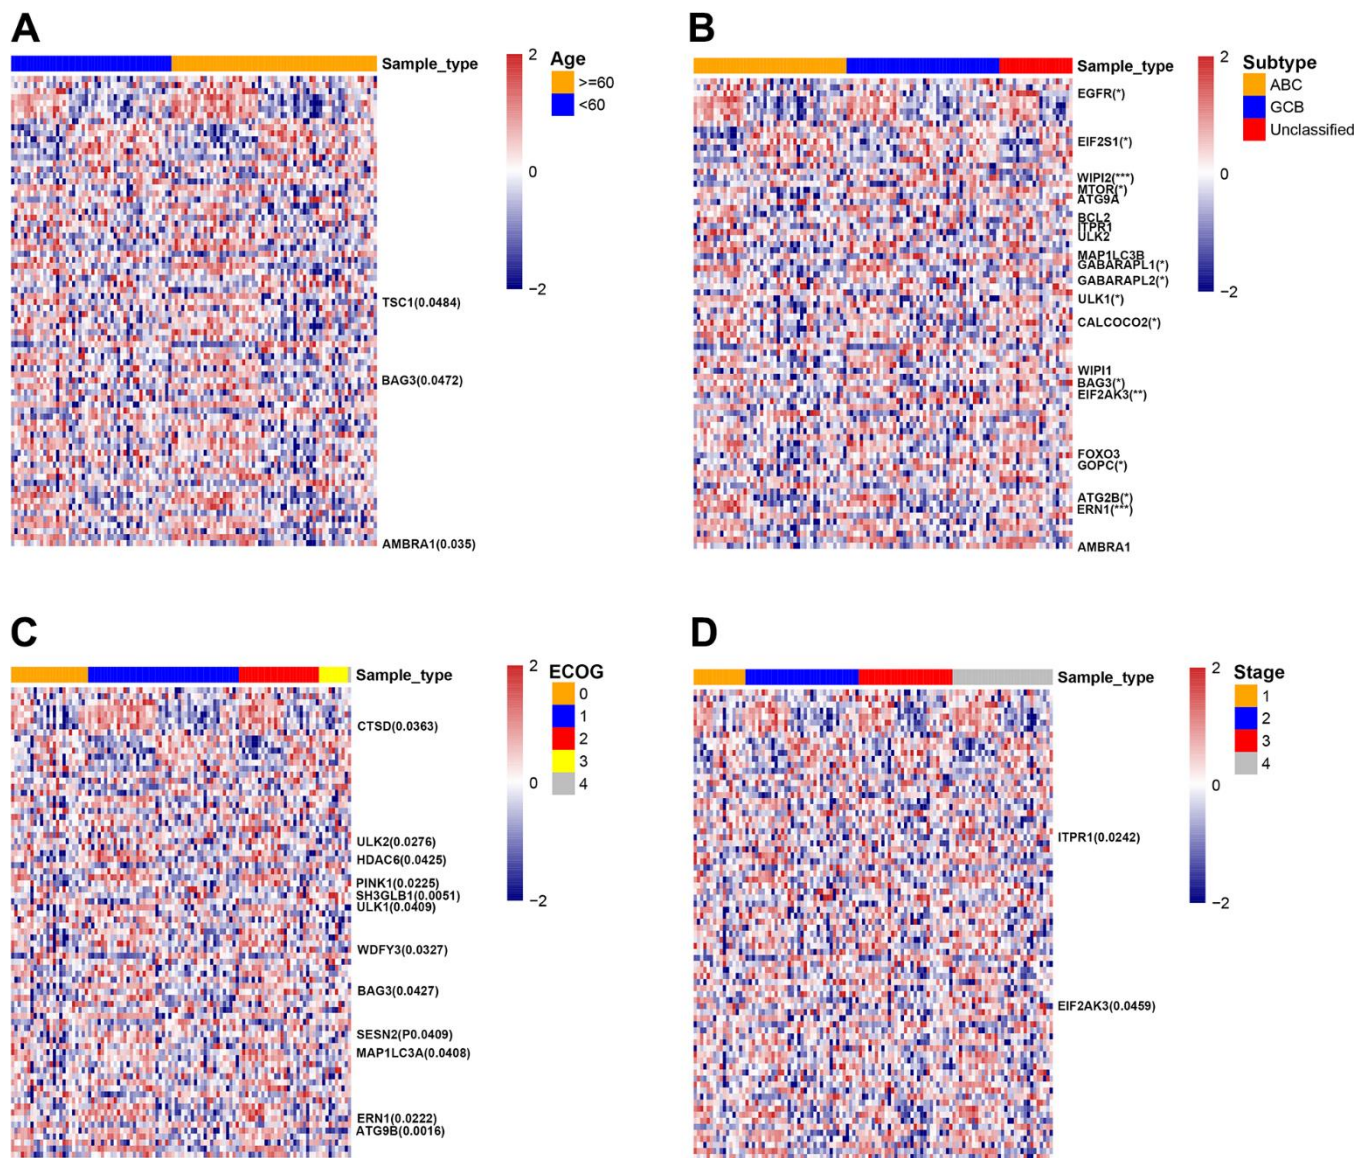

**Supplementary Figure 1. Heatmap of alterations in genetic expression profiles across. (A) age, (B) subtype, (C) ECOG, and (D) stage. Columns correspond to tumor samples and rows correspond to 80 autophagy-related genes.**

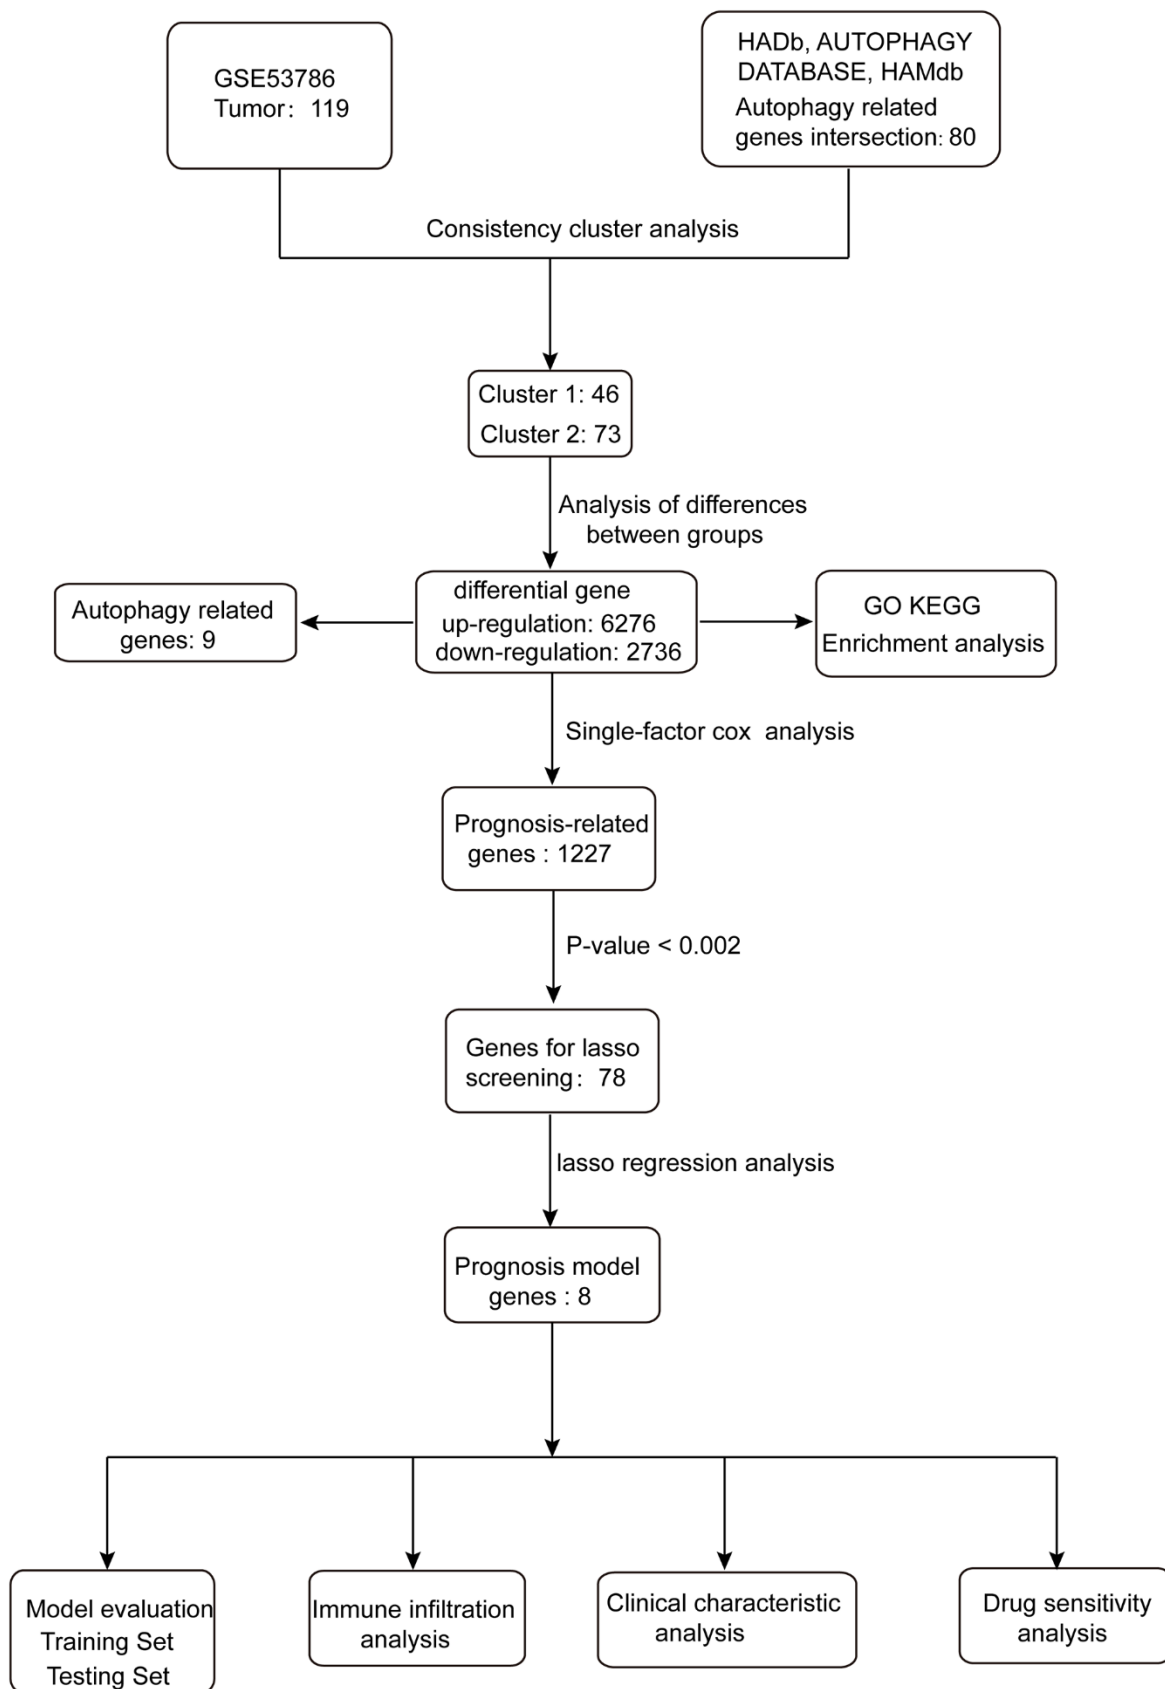

Supplementary Figure 2. The workflow of this study.

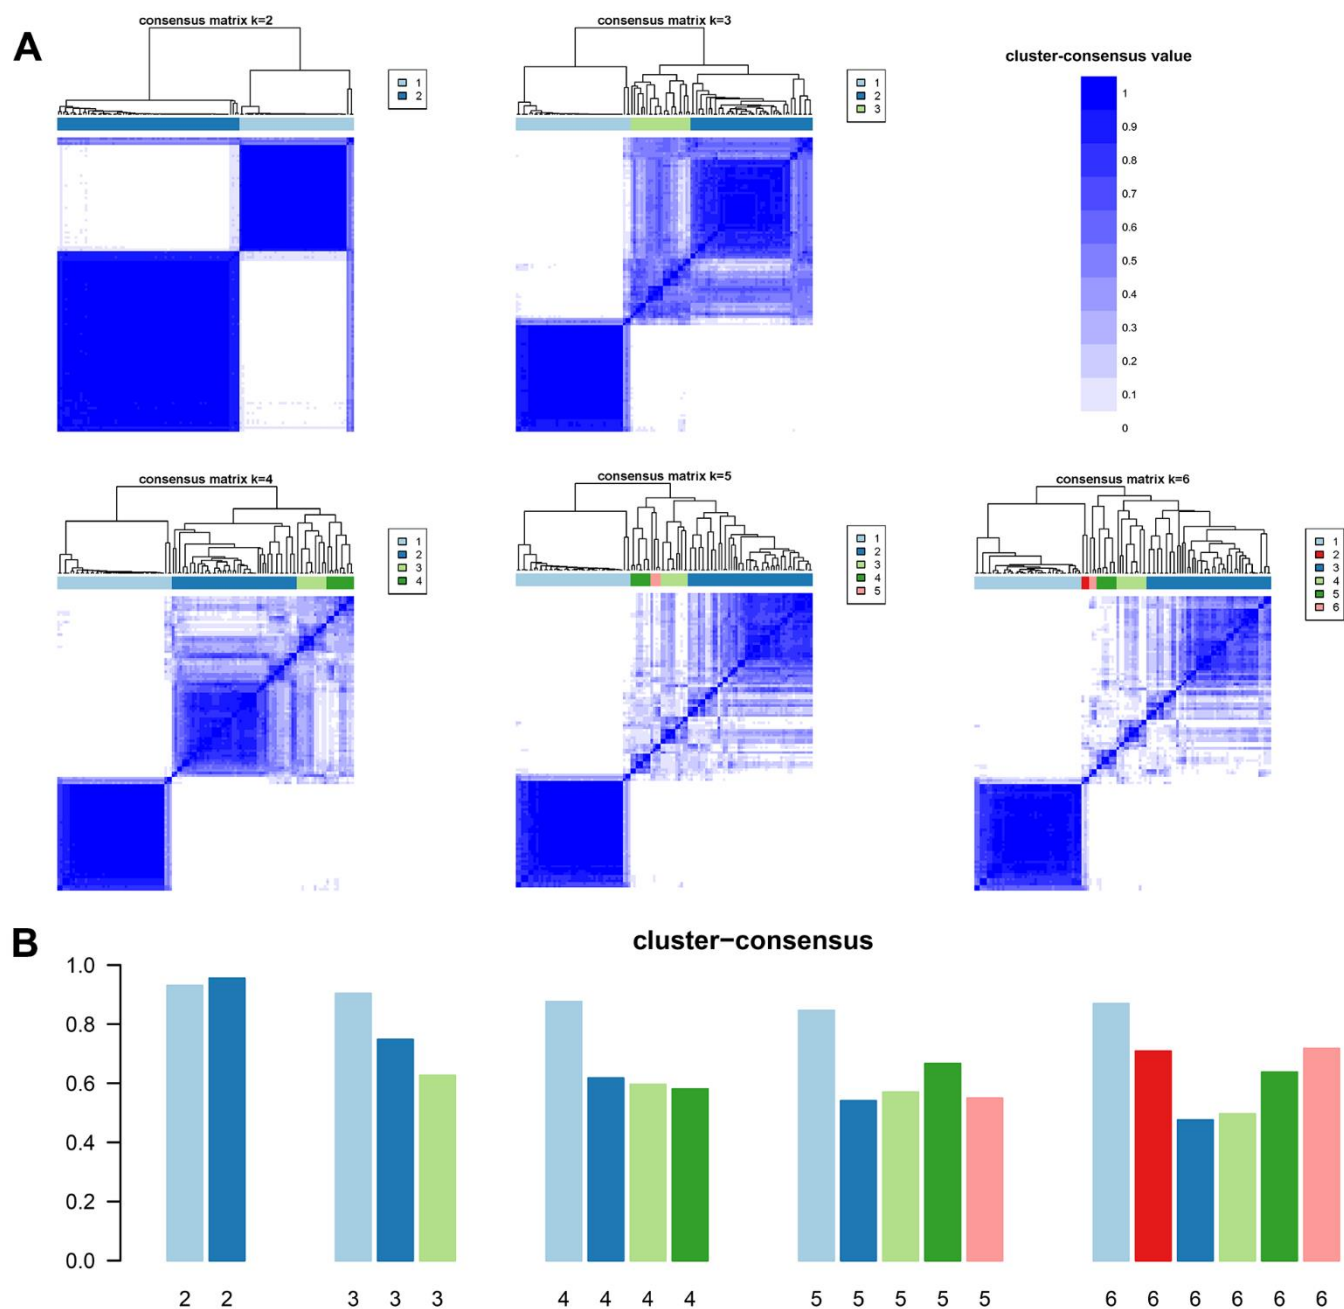

**Supplementary Figure 3. Unsupervised clustering molecular subtypes of DLBCL based on autophagy genes.** (A) Consensus matrix heatmap depicting consensus values for different numbers of clusters. (B) The cluster-consensus values for different numbers of clusters.

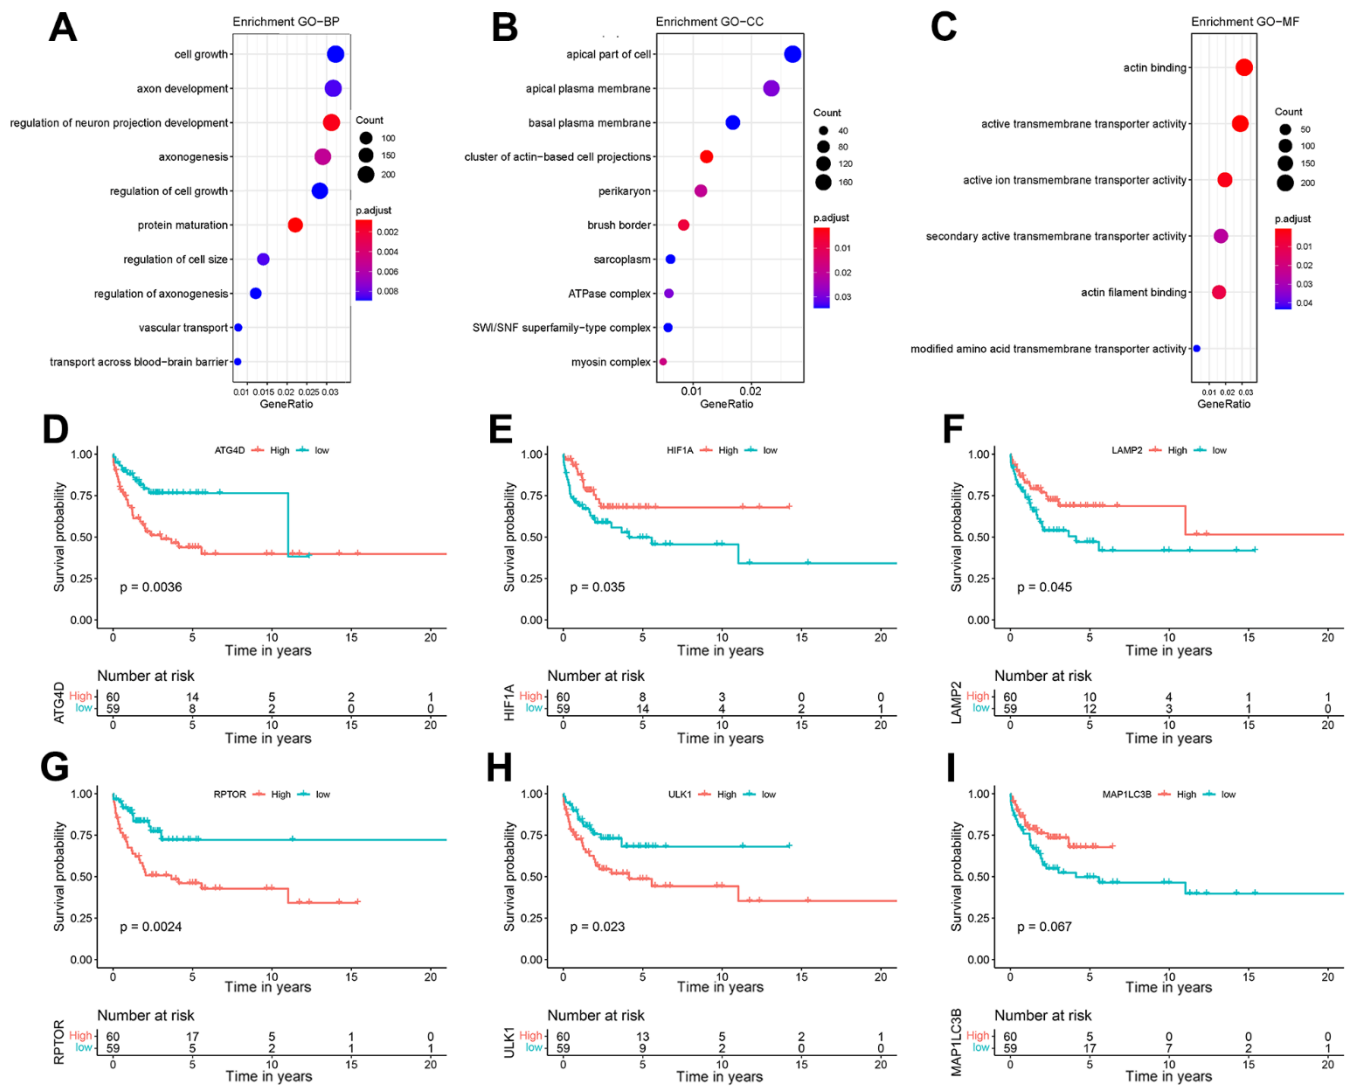

**Supplementary Figure 4. GO annotation of the differentially expressed genes and survival analysis of DLBCL patients.** GO enrichment analysis includes (A) biological process, (B) cell component, (C) molecular function. Prognosis signatures of DLBCL patients with high or low expression of (D) ATG4D, (E) HIF1A, (F) LAMP2, (G) RPTOR, (H) ULK1, and (I) MAP1LC3B; the median of gene expression was used as a cut-off for survival analysis. GO, gene ontology; DLBCL, diffuse large B-cell lymphoma.

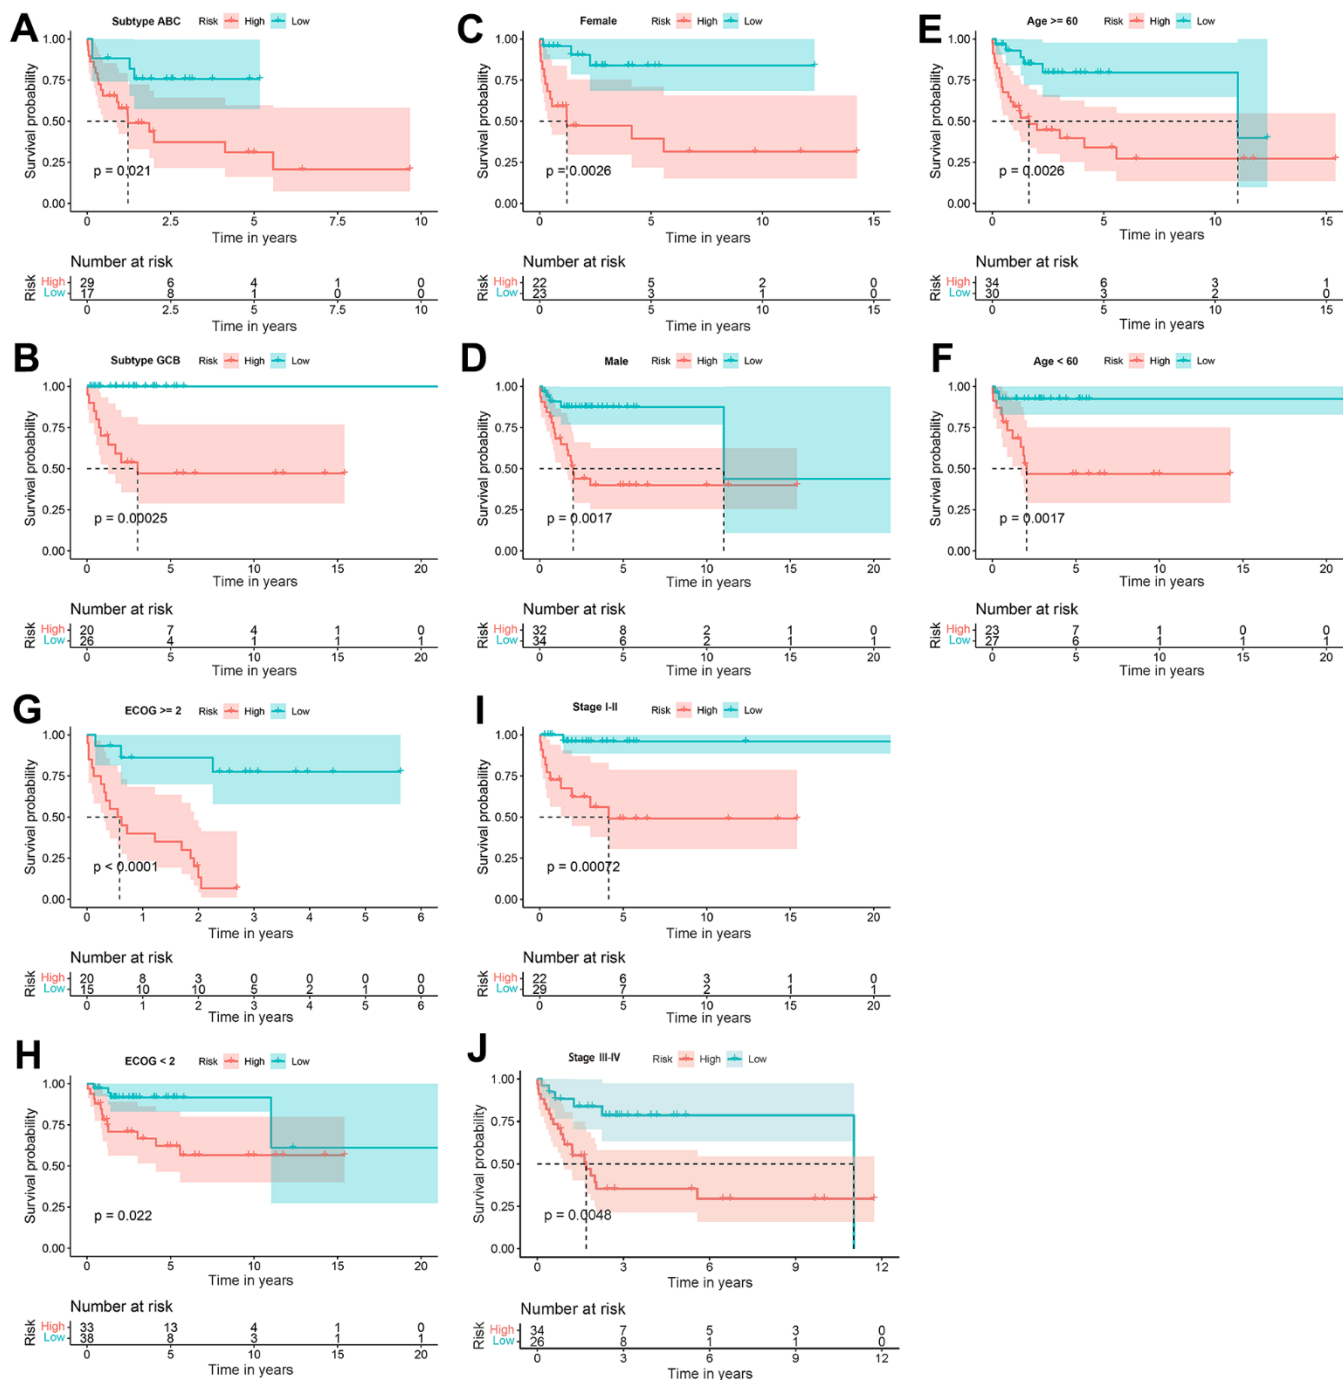

**Supplementary Figure 5. Kaplan-Meier curves indicated the survival differences between the low-risk group and high-risk group.** DLBCL patients were categorized into different groups according to clinical characteristics including (A) subtype ABC, (B) subtype GCB, (C) female, (D) male, (E) age  $\geq 60$ , (F) age  $< 60$ , (G) ECOG  $\geq 2$ , (H) ECOG  $< 2$ , (I) stage I-II, and (J) stage III-IV. Survival comparison of high-risk and low-risk groups among patients with different clinical characteristics.
