# Supplementary material for: Prediction significance of autophagy-related genes in survival probability and drug resistance in diffuse large B-cell lymphoma
Source: Aging (Albany NY). 2024 Jan 17;16(2):1049–76. doi: 10.18632/aging.205282 (PMC10866451; doi:10.18632/aging.205282)
Supplement: Supplementary Table 2 [file aging-16-205282-s003.xls]

## Sheet: Supplementary Table S2
Supplementary Table 2. Differential gene expression analysis between two autophagy-related molecular subtypes.
Gene	logFC	AveExpr	t	P.Value	adj.P.Val	B	Change
FOLR1	-5.24979	11.4994	-27.8447	2.65e-54	5.34e-50	112.834	DOWN
NAA15	-3.79581	10.2222	-27.0615	5.14e-53	5.18e-49	109.939	DOWN
ZC3H15	-3.0376	12.3029	-23.1594	3.54e-46	2.38e-42	94.5057	DOWN
PPIG	-2.77545	10.7876	-22.7429	2.1e-45	1.06e-41	92.7533	DOWN
FAXDC2	2.29372	10.3019	21.1671	2.15e-42	8.66e-39	85.9287	UP
TAF1B	-2.11202	9.41007	-20.4605	5.3e-41	1.78e-37	82.7664	DOWN
IGHMBP2	1.49906	9.11858	20.3838	7.53e-41	2.17e-37	82.4193	UP
CALCOCO1	2.4378	8.85007	19.7598	1.35e-39	3.41e-36	79.5672	UP
GOLGA2	1.63517	9.31563	19.5901	3e-39	6.71e-36	78.7826	UP
GRK2	1.99362	9.28439	19.1983	1.9e-38	3.83e-35	76.9574	UP
SNRNP70	1.95486	11.1146	19.0559	3.74e-38	6.85e-35	76.2893	UP
NPEPPS	-1.75103	10.644	-19.0365	4.1e-38	6.89e-35	76.1979	DOWN
STK11	1.82958	8.75704	18.7496	1.61e-37	2.43e-34	74.8426	UP
SRRM2	2.25671	11.191	18.7406	1.69e-37	2.43e-34	74.8	UP
EIF5	-1.86325	12.7575	-18.7134	1.92e-37	2.58e-34	74.6707	DOWN
GANAB	2.17031	10.4294	18.6862	2.19e-37	2.71e-34	74.5415	UP
STRN4	2.04461	8.41024	18.677	2.29e-37	2.71e-34	74.498	UP
E2F4	1.45948	10.2447	18.5852	3.56e-37	3.99e-34	74.061	UP
KLHDC3	1.8192	9.35411	18.5518	4.18e-37	4.44e-34	73.9018	UP
PPP2R5E	-1.57762	11.4003	-18.5268	4.72e-37	4.76e-34	73.7826	DOWN
CPSF7	1.56534	10.6293	18.5111	5.09e-37	4.88e-34	73.7079	UP
SECISBP2	-2.23184	10.5714	-18.4416	7.12e-37	6.52e-34	73.3759	DOWN
CCAR1	-2.48664	11.5687	-18.137	3.12e-36	2.62e-33	71.913	DOWN
CDK5RAP3	1.7232	11.3987	18.0196	5.54e-36	4.47e-33	71.346	UP
LENG8	2.85057	9.06187	17.9055	9.69e-36	7.24e-33	70.7931	UP
TRIM23	-2.20929	8.32708	-17.9054	9.69e-36	7.24e-33	70.7926	DOWN
ZNF800	-2.61393	8.97446	-17.86	1.21e-35	8.72e-33	70.5724	DOWN
ZCRB1	-1.6032	12.2846	-17.823	1.45e-35	1.01e-32	70.3923	DOWN
CHD8	1.83875	9.67292	17.7902	1.71e-35	1.15e-32	70.2326	UP
TBC1D10B	1.68121	9.98897	17.7536	2.04e-35	1.33e-32	70.0544	UP
YIPF5	-1.40254	11.9404	-17.6767	2.98e-35	1.88e-32	69.6796	DOWN
EML3	2.20809	9.3733	17.6293	3.77e-35	2.29e-32	69.4483	UP
SPATA24	1.86046	10.1744	17.6243	3.87e-35	2.29e-32	69.4235	UP
TMEM259	2.05276	9.22302	17.4028	1.16e-34	6.65e-32	68.3375	UP
MRPL38	2.0427	9.10552	17.3978	1.19e-34	6.65e-32	68.313	UP
KRR1	-1.67222	11.0066	-17.3855	1.26e-34	6.87e-32	68.2528	DOWN
NUCB1	2.53723	9.61509	17.3784	1.31e-34	6.93e-32	68.2175	UP
U2AF2	1.64804	11.2611	17.3471	1.53e-34	7.89e-32	68.0639	UP
EPOR	2.39495	9.18844	17.257	2.39e-34	1.2e-31	67.6197	UP
RSF1	-1.85698	10.0888	-17.0939	5.4e-34	2.66e-31	66.8128	DOWN
IRF3	1.65865	10.4127	17.0127	8.11e-34	3.89e-31	66.41	UP
RSRC1	-1.67508	9.7339	-16.9122	1.34e-33	6.3e-31	65.9101	DOWN
LINC01000	2.60711	9.9174	16.8898	1.5e-33	6.81e-31	65.7984	UP
ADPGK	1.23674	11.1571	16.8876	1.52e-33	6.81e-31	65.7878	UP
GTPBP2	1.53783	9.22471	16.8486	1.85e-33	8.11e-31	65.5935	UP
SYMPK	1.81223	9.62419	16.8206	2.13e-33	9.14e-31	65.4538	UP
ZFYVE27	1.37041	9.048	16.7907	2.48e-33	1.04e-30	65.3042	UP
BRD9	1.63838	10.0992	16.7361	3.26e-33	1.34e-30	65.0312	UP
PWP1	-1.64261	12.0677	-16.6728	4.49e-33	1.81e-30	64.7145	DOWN
NUDCD2	-1.67885	11.515	-16.4038	1.76e-32	6.95e-30	63.3627	DOWN
ACADVL	1.843	10.4687	16.3883	1.9e-32	7.38e-30	63.2848	UP
ACIN1	2.41265	8.97539	16.3655	2.14e-32	8.13e-30	63.1695	UP
PSMC6	-1.57399	12.6273	-16.3397	2.44e-32	9.1e-30	63.0391	DOWN
ESF1	-2.6328	9.50017	-16.3233	2.65e-32	9.71e-30	62.9563	DOWN
LYRM2	-2.02151	10.2857	-16.2982	3.01e-32	1.08e-29	62.8294	DOWN
STX16	1.39361	10.9817	16.236	4.14e-32	1.46e-29	62.5148	UP
ARFGAP2	1.64455	10.4654	16.2266	4.34e-32	1.51e-29	62.4675	UP
SLC16A7	-3.4443	8.76659	-16.2163	4.58e-32	1.56e-29	62.4149	DOWN
FZR1	1.62817	8.27412	16.1959	5.08e-32	1.71e-29	62.3117	UP
ZHX1	-1.45172	9.56812	-16.1864	5.33e-32	1.76e-29	62.2637	DOWN
TDP2	-1.21385	12.5125	-16.1819	5.46e-32	1.77e-29	62.2406	DOWN
LYPLA2	1.42631	10.2551	16.1576	6.18e-32	1.98e-29	62.1175	UP
FAM111B	-3.66792	7.33448	-16.0807	9.16e-32	2.84e-29	61.727	DOWN
SIRT3	1.17189	9.19322	16.0235	1.23e-31	3.75e-29	61.4363	UP
CTSZ	-2.9015	12.0969	-16.0184	1.26e-31	3.8e-29	61.4103	DOWN
SH3GLB2	1.77219	8.23238	16.0017	1.37e-31	4.07e-29	61.3254	UP
ZMAT3	-2.92423	10.8089	-15.9785	1.55e-31	4.52e-29	61.2073	DOWN
SIRT6	1.63757	8.83031	15.9739	1.59e-31	4.57e-29	61.1838	UP
KAT5	1.41559	9.64103	15.961	1.69e-31	4.81e-29	61.1182	UP
PIGS	2.04957	9.24044	15.9372	1.92e-31	5.36e-29	60.9964	UP
KIAA1143	-1.9444	11.0372	-15.7978	3.93e-31	1.08e-28	60.2848	DOWN
AP2M1	1.507	11.5174	15.7967	3.95e-31	1.08e-28	60.2791	UP
VPS72	1.36943	10.1012	15.6989	6.55e-31	1.74e-28	59.7781	UP
SEPTIN7P13	2.93892	7.301	15.6965	6.63e-31	1.74e-28	59.766	UP
RAB5B	2.09152	9.11251	15.6961	6.64e-31	1.74e-28	59.7635	UP
DMWD	1.8309	8.8805	15.6662	7.75e-31	2e-28	59.6104	UP
DYNC1LI1	-1.21227	10.3368	-15.6435	8.72e-31	2.23e-28	59.4939	DOWN
GRINA	2.84706	9.40998	15.6325	9.23e-31	2.33e-28	59.4373	UP
PRKACA	2.06402	8.89353	15.6158	1.01e-30	2.51e-28	59.3516	UP
PAX8	1.19225	9.57197	15.5696	1.28e-30	3.14e-28	59.1142	UP
FAM204A	-1.4463	11.036	-15.5279	1.59e-30	3.83e-28	58.8998	DOWN
TMEM109	1.50946	9.98346	15.5271	1.59e-30	3.83e-28	58.8956	UP
INPPL1	2.11187	9.2947	15.4918	1.92e-30	4.54e-28	58.7137	UP
GS1-124K5.11	1.65814	9.19743	15.4497	2.39e-30	5.59e-28	58.4965	UP
OGFR	1.42422	9.35503	15.4255	2.7e-30	6.27e-28	58.3719	UP
SLC39A13	1.73473	8.67458	15.4203	2.78e-30	6.31e-28	58.3453	UP
FASN	1.93059	9.15443	15.42	2.78e-30	6.31e-28	58.3433	UP
MLF2	1.67284	10.6336	15.3748	3.52e-30	7.89e-28	58.1102	UP
CWC27	-1.46679	10.3798	-15.3654	3.7e-30	8.19e-28	58.0617	DOWN
HLA-J	2.00918	12.2035	15.3573	3.86e-30	8.45e-28	58.0198	UP
ZNF384	1.2473	10.1066	15.3475	4.06e-30	8.8e-28	57.969	UP
CUL7	1.56765	8.3052	15.3192	4.71e-30	1.01e-27	57.8228	UP
TMEM184C	-1.2366	9.59241	-15.2931	5.39e-30	1.14e-27	57.6876	DOWN
SIN3B	1.58959	8.62392	15.172	1.02e-29	2.13e-27	57.0602	UP
IMPA1	-1.36528	12.0044	-15.1665	1.05e-29	2.16e-27	57.0315	DOWN
DCAF15	2.4707	8.06147	15.1654	1.05e-29	2.16e-27	57.0261	UP
GSK3A	1.35041	9.03464	15.1366	1.22e-29	2.48e-27	56.8763	UP
DARS1	-1.53267	13.4289	-15.1352	1.23e-29	2.48e-27	56.8692	DOWN
C20orf27	1.76775	8.65539	15.133	1.25e-29	2.49e-27	56.8579	UP
THUMPD1	-1.36973	11.0638	-15.1308	1.26e-29	2.49e-27	56.8462	DOWN
DLGAP4	1.54318	9.40167	15.0916	1.55e-29	3.03e-27	56.6426	UP
MVK	1.02608	9.75025	15.089	1.57e-29	3.04e-27	56.6293	UP
ATG12	-1.41576	10.9174	-15.0847	1.6e-29	3.08e-27	56.6069	DOWN
PABPN1	1.9843	9.63452	15.0563	1.86e-29	3.54e-27	56.4595	UP
TMED5	-1.27129	12.5516	-15.0455	1.97e-29	3.68e-27	56.4033	DOWN
BCAP29	-1.77678	10.4483	-15.0453	1.97e-29	3.68e-27	56.4021	DOWN
SDAD1	-1.76546	10.277	-15.018	2.28e-29	4.21e-27	56.2599	DOWN
RNF6	-1.22542	12.1591	-15.0041	2.45e-29	4.49e-27	56.1875	DOWN
TSEN54	1.57729	9.87061	14.994	2.58e-29	4.69e-27	56.1352	UP
AZI2	-1.59958	9.46943	-14.9725	2.89e-29	5.2e-27	56.0229	DOWN
GDI1	1.6925	11.2616	14.9687	2.95e-29	5.26e-27	56.0031	UP
COPS7A	1.08997	9.94717	14.9404	3.42e-29	6.05e-27	55.8559	UP
IFNGR2	1.32408	11.6412	14.917	3.87e-29	6.78e-27	55.7335	UP
HYOU1	1.94751	10.5402	14.9133	3.94e-29	6.86e-27	55.7145	UP
ZFC3H1	1.33546	10.5224	14.9097	4.02e-29	6.93e-27	55.6955	UP
TOMM34	1.24708	9.65757	14.8809	4.68e-29	7.99e-27	55.5455	UP
TRMT6	-1.96568	10.3208	-14.8656	5.07e-29	8.59e-27	55.4653	DOWN
SEC61A2	1.75048	8.01398	14.84	5.8e-29	9.75e-27	55.3317	UP
SLC29A1	2.08257	8.90589	14.8181	6.51e-29	1.09e-26	55.2172	UP
ZKSCAN8	1.50079	9.36315	14.8151	6.62e-29	1.09e-26	55.2016	UP
LIMD2	2.50563	8.92404	14.7813	7.91e-29	1.3e-26	55.0245	UP
MLLT6	2.14629	9.95893	14.7788	8.02e-29	1.3e-26	55.0114	UP
FAM168B	1.44861	10.1213	14.7693	8.43e-29	1.36e-26	54.9619	UP
CWF19L1	1.81406	8.72448	14.7675	8.51e-29	1.36e-26	54.9523	UP
MADD	1.52405	9.4741	14.7167	1.11e-28	1.77e-26	54.6863	UP
SF1	1.68704	11.5792	14.6608	1.49e-28	2.35e-26	54.3935	UP
TBC1D14	1.21341	10.0167	14.6459	1.62e-28	2.53e-26	54.3155	UP
MAVS	2.02814	9.31161	14.6276	1.78e-28	2.76e-26	54.2192	UP
CACNG6	1.4562	8.94392	14.6125	1.93e-28	2.97e-26	54.1399	UP
PYGO2	1.64929	8.7346	14.5724	2.39e-28	3.63e-26	53.9294	UP
HMGXB3	1.04296	9.23187	14.5716	2.4e-28	3.63e-26	53.9254	UP
POM121L12	3.00743	7.39641	14.5641	2.49e-28	3.75e-26	53.886	UP
PSME3	1.38485	11.1039	14.5392	2.85e-28	4.25e-26	53.7549	UP
RHBDD3	1.14091	8.20581	14.5079	3.36e-28	4.98e-26	53.5905	UP
PPP1R10	1.87502	9.70882	14.4953	3.59e-28	5.28e-26	53.5244	UP
MMUT	-1.39755	10.8992	-14.4839	3.81e-28	5.57e-26	53.4643	DOWN
AK9	-3.31274	6.74292	-14.4638	4.24e-28	6.12e-26	53.3582	DOWN
SKIV2L	1.84836	9.30365	14.4636	4.25e-28	6.12e-26	53.3574	UP
RPF2	-1.59066	11.5969	-14.4617	4.29e-28	6.14e-26	53.3475	DOWN
PSMD3	1.49857	10.4126	14.4116	5.6e-28	7.95e-26	53.0836	UP
WNT6	1.70857	8.34273	14.4057	5.78e-28	8.14e-26	53.0525	UP
NFATC2IP	1.83384	10.9216	14.4004	5.94e-28	8.32e-26	53.0246	UP
FIZ1	1.92747	8.71036	14.3891	6.31e-28	8.77e-26	52.9649	UP
IFFO1	1.43832	10.0662	14.375	6.8e-28	9.37e-26	52.8907	UP
SLC30A5	-1.09429	10.4128	-14.3741	6.84e-28	9.37e-26	52.8857	DOWN
PHRF1	2.15249	8.00381	14.371	6.95e-28	9.47e-26	52.8693	UP
UBE2Z	1.01093	11.2195	14.3675	7.08e-28	9.58e-26	52.8509	UP
DHX36	-2.00933	11.0881	-14.3572	7.48e-28	1e-25	52.7963	DOWN
IGSF8	2.49452	7.59594	14.3552	7.56e-28	1e-25	52.7861	UP
C3orf38	-1.50126	10.737	-14.355	7.57e-28	1e-25	52.785	DOWN
HAUS5	1.44474	9.79991	14.3149	9.37e-28	1.23e-25	52.5731	UP
EIF4G1	1.83911	10.6809	14.2891	1.07e-27	1.41e-25	52.437	UP
ARFIP2	1.03867	10.2024	14.2831	1.11e-27	1.44e-25	52.4054	UP
SPI1	2.71088	7.94126	14.2637	1.23e-27	1.59e-25	52.3028	UP
NPIPA1	2.17365	11.1608	14.2624	1.24e-27	1.59e-25	52.2957	UP
RNH1	1.59472	11.0232	14.2543	1.29e-27	1.65e-25	52.2531	UP
FAM193B	1.71626	9.74308	14.2293	1.48e-27	1.87e-25	52.121	UP
TLN1	3.00164	8.26092	14.2137	1.61e-27	2.02e-25	52.0384	UP
YWHAH	1.25056	10.2465	14.2129	1.61e-27	2.02e-25	52.0342	UP
BSDC1	1.114	9.46747	14.186	1.86e-27	2.32e-25	51.8918	UP
ZNF148	-1.44873	10.2312	-14.1712	2.01e-27	2.49e-25	51.8134	DOWN
GIGYF1	2.4594	8.05038	14.14	2.38e-27	2.93e-25	51.6482	UP
ZRSR2	1.33721	10.0413	14.1351	2.44e-27	2.99e-25	51.622	UP
ACTR2	-1.27734	13.584	-14.1288	2.53e-27	3.07e-25	51.5887	DOWN
INTS3	1.3979	9.61112	14.0923	3.07e-27	3.71e-25	51.3955	UP
ZBTB21	-1.52576	9.57754	-14.0809	3.26e-27	3.92e-25	51.3347	DOWN
HGS	1.6386	10.3844	14.071	3.44e-27	4.11e-25	51.2824	UP
C18orf21	-1.38084	11.1147	-14.0482	3.89e-27	4.61e-25	51.1614	DOWN
CNOT7	-1.37125	12.8602	-14.0223	4.47e-27	5.25e-25	51.0238	DOWN
HEXD	1.44861	8.92123	14.0218	4.48e-27	5.25e-25	51.0213	UP
MAF1	1.50026	10.2302	13.9871	5.39e-27	6.28e-25	50.8369	UP
GBF1	1.44509	9.03417	13.9652	6.06e-27	7.02e-25	50.7207	UP
CBLN3	1.61784	8.70155	13.9497	6.59e-27	7.59e-25	50.6386	UP
PSMG2	-0.963568	13.4422	-13.9365	7.07e-27	8.1e-25	50.5681	DOWN
CEP250	1.45481	9.1624	13.9166	7.87e-27	8.96e-25	50.4621	UP
ING3	-1.20284	10.4923	-13.915	7.93e-27	8.99e-25	50.4537	DOWN
RASEF	-3.38212	9.68546	-13.9131	8.02e-27	9.03e-25	50.4434	DOWN
NDUFA6	-1.40244	12.6936	-13.9015	8.53e-27	9.55e-25	50.3821	DOWN
CDC34	1.19954	9.60234	13.8904	9.05e-27	1.01e-24	50.323	UP
ANAPC2	1.4863	9.20004	13.8854	9.3e-27	1.03e-24	50.2963	UP
MLEC	-1.6707	10.7434	-13.8519	1.11e-26	1.23e-24	50.118	DOWN
SPATS2	-1.84231	9.90457	-13.8501	1.12e-26	1.23e-24	50.1086	DOWN
ARRB2	2.19051	8.4634	13.8329	1.23e-26	1.34e-24	50.0166	UP
ZNF687	2.61745	6.96155	13.8285	1.26e-26	1.37e-24	49.9935	UP
FBXL17	-1.4194	9.90772	-13.8208	1.32e-26	1.42e-24	49.9521	DOWN
DDX11	1.92275	9.9845	13.8117	1.38e-26	1.48e-24	49.9036	UP
NDUFB1	-1.25943	14.0689	-13.8017	1.46e-26	1.55e-24	49.8506	DOWN
TCF25	1.13438	11.5151	13.7815	1.62e-26	1.72e-24	49.7429	UP
KLHDC4	1.6892	9.69875	13.752	1.9e-26	2.01e-24	49.5854	UP
ZNF843	1.72682	8.25717	13.7289	2.16e-26	2.26e-24	49.4622	UP
H1-5	-3.92439	6.62842	-13.7069	2.43e-26	2.53e-24	49.3446	DOWN
CCDC88C	2.12655	9.85437	13.6856	2.72e-26	2.83e-24	49.2311	UP
PPP2R1A	1.37875	10.3257	13.6819	2.78e-26	2.87e-24	49.2114	UP
C11orf54	-1.42304	10.7647	-13.6661	3.02e-26	3.11e-24	49.1269	DOWN
SMIM10L1	-1.08583	11.4134	-13.6651	3.04e-26	3.11e-24	49.1216	DOWN
SRP9	-1.21554	14.1131	-13.6567	3.18e-26	3.24e-24	49.0767	DOWN
ATP5PB	-1.30919	14.329	-13.649	3.31e-26	3.36e-24	49.0357	DOWN
PSD4	1.35625	9.50391	13.6435	3.41e-26	3.44e-24	49.006	UP
MAN2C1	1.79991	8.68342	13.6415	3.45e-26	3.46e-24	48.9955	UP
SH2B1	1.38313	8.92213	13.6347	3.58e-26	3.57e-24	48.9591	UP
ATP5PD	-1.06191	14.0328	-13.6022	4.26e-26	4.24e-24	48.7852	DOWN
BRAT1	1.79233	9.18444	13.5786	4.84e-26	4.79e-24	48.6592	UP
FXYD3	1.42277	8.61544	13.5561	5.47e-26	5.38e-24	48.5388	UP
RRP9	1.90946	8.46867	13.5353	6.12e-26	5.99e-24	48.4272	UP
COPS2	-1.09902	12.4643	-13.503	7.28e-26	7.08e-24	48.2547	DOWN
NSL1	-1.18479	12.1253	-13.5024	7.31e-26	7.08e-24	48.2511	DOWN
GABBR1	2.95265	7.49558	13.5005	7.38e-26	7.12e-24	48.2408	UP
CMBL	1.45041	11.7262	13.4841	8.06e-26	7.74e-24	48.1532	UP
YWHAQ	-0.912658	14.0942	-13.4802	8.23e-26	7.87e-24	48.1325	DOWN
ATP6V0A1	1.71535	9.65505	13.4717	8.62e-26	8.2e-24	48.0866	UP
OGFOD2	0.931756	9.24983	13.466	8.89e-26	8.42e-24	48.0559	UP
MSTO1	1.21598	9.29734	13.4528	9.55e-26	9e-24	47.9854	UP
INO80E	1.2458	9.54249	13.4489	9.75e-26	9.15e-24	47.9645	UP
MAZ	1.53551	10.0718	13.4076	1.22e-25	1.14e-23	47.7431	UP
DOT1L	1.92188	8.42938	13.4033	1.25e-25	1.16e-23	47.7198	UP
RAB5C	1.52564	10.474	13.3884	1.35e-25	1.25e-23	47.6402	UP
STXBP2	1.34488	9.47955	13.3858	1.37e-25	1.26e-23	47.6258	UP
BECN1	0.849387	11.0433	13.3798	1.42e-25	1.3e-23	47.5939	UP
NEU3	1.27108	9.34204	13.373	1.47e-25	1.34e-23	47.5573	UP
TLE5	1.56193	10.026	13.3374	1.78e-25	1.61e-23	47.3662	UP
LMO7	-3.29149	7.98482	-13.3239	1.92e-25	1.73e-23	47.2935	DOWN
SMIM19	-1.73037	12.141	-13.3204	1.95e-25	1.75e-23	47.2749	DOWN
ZDHHC7	1.21698	10.8307	13.3181	1.98e-25	1.76e-23	47.2627	UP
USP19	1.12416	9.78076	13.3178	1.98e-25	1.76e-23	47.261	UP
LIG1	1.6149	9.60035	13.3137	2.03e-25	1.79e-23	47.2387	UP
THRAP3	1.25264	10.4071	13.3037	2.14e-25	1.88e-23	47.185	UP
ODF2	1.89447	8.82641	13.3019	2.16e-25	1.89e-23	47.1756	UP
PNPLA2	1.30982	10.3505	13.2884	2.32e-25	2.03e-23	47.1029	UP
PPP6R3	-0.962056	11.643	-13.2761	2.48e-25	2.15e-23	47.0368	DOWN
SYNCRIP	-2.00845	11.744	-13.2761	2.48e-25	2.15e-23	47.0368	DOWN
CRTC2	1.86861	9.26229	13.2684	2.59e-25	2.23e-23	46.9952	UP
BAG4	-1.24509	10.9021	-13.2673	2.61e-25	2.24e-23	46.9897	DOWN
UBE2K	-1.1473	11.4597	-13.2629	2.67e-25	2.28e-23	46.9657	DOWN
CNBP	-0.868136	13.7238	-13.2606	2.7e-25	2.3e-23	46.9536	DOWN
NSA2	-1.09261	13.877	-13.2596	2.72e-25	2.3e-23	46.9479	DOWN
ARHGAP33	2.52612	7.81765	13.2578	2.74e-25	2.31e-23	46.9386	UP
AGPAT1	1.42141	10.0274	13.2501	2.86e-25	2.4e-23	46.8972	UP
FKBP3	-1.19702	12.8171	-13.2323	3.15e-25	2.64e-23	46.8014	DOWN
LINC02604	2.66743	7.56109	13.2256	3.27e-25	2.72e-23	46.7653	UP
USP7	1.27631	11.5978	13.2245	3.29e-25	2.73e-23	46.7595	UP
PTGES2	1.65995	8.44254	13.2216	3.34e-25	2.76e-23	46.7439	UP
UVSSA	1.96361	8.99845	13.2198	3.37e-25	2.77e-23	46.7338	UP
CETN3	-1.46696	11.9135	-13.2196	3.37e-25	2.77e-23	46.733	DOWN
PFDN4	-1.55706	12.0691	-13.2141	3.48e-25	2.84e-23	46.7032	DOWN
SMIM26	-1.332	12.3392	-13.209	3.57e-25	2.91e-23	46.6759	DOWN
ANKLE2	1.17507	9.41416	13.1945	3.87e-25	3.13e-23	46.5977	UP
MRPL19	-1.37938	10.5981	-13.1807	4.17e-25	3.36e-23	46.5239	DOWN
RHOT2	1.14506	9.6325	13.1495	4.94e-25	3.97e-23	46.3553	UP
MESP2	1.68294	8.25371	13.1456	5.04e-25	4.03e-23	46.3345	UP
TELO2	1.32885	8.81482	13.1447	5.07e-25	4.04e-23	46.3296	UP
UBE2D4	0.883793	9.95569	13.1364	5.3e-25	4.21e-23	46.2848	UP
LOC100130744	3.31105	5.30424	13.1255	5.62e-25	4.45e-23	46.2264	UP
PYROXD1	-1.15344	10.8565	-13.1238	5.67e-25	4.47e-23	46.2174	DOWN
PPP1R9B	2.81337	9.06689	13.1066	6.23e-25	4.89e-23	46.1247	UP
RFK	-1.52274	10.9009	-13.1015	6.41e-25	5.01e-23	46.0971	DOWN
TROAP	1.68012	9.21425	13.0974	6.55e-25	5.1e-23	46.0751	UP
ESCO2	-2.05136	8.27057	-13.0695	7.62e-25	5.91e-23	45.9243	DOWN
HDAC6	1.40675	9.77473	13.0649	7.82e-25	6.04e-23	45.8995	UP
SLC9A8	1.79426	8.40051	13.0468	8.62e-25	6.62e-23	45.802	UP
WDR89	1.19261	9.0992	13.0466	8.63e-25	6.62e-23	45.801	UP
RECQL4	1.48137	9.35867	13.036	9.14e-25	6.98e-23	45.744	UP
TSEN15	-1.56242	10.892	-13.0348	9.2e-25	7e-23	45.7374	DOWN
PTPN9	1.20704	9.08744	13.0253	9.69e-25	7.35e-23	45.6862	UP
FBXL4	-1.72808	8.9208	-13.024	9.76e-25	7.37e-23	45.6789	DOWN
USP49	1.61077	8.66373	13.0087	1.06e-24	7.98e-23	45.5963	UP
FBXO44	2.45463	6.7264	12.9942	1.15e-24	8.6e-23	45.5181	UP
CDK16	1.46955	8.93629	12.9928	1.16e-24	8.64e-23	45.5106	UP
NDUFA4	-1.37829	13.9429	-12.9793	1.25e-24	9.26e-23	45.4377	DOWN
ROGDI	1.41163	8.21834	12.9775	1.26e-24	9.32e-23	45.4279	UP
SLC17A9	2.03073	8.86513	12.9585	1.39e-24	1.03e-22	45.3254	UP
PPM1G	1.9649	9.9206	12.9438	1.51e-24	1.11e-22	45.2462	UP
OCIAD1	-0.957824	12.7158	-12.9433	1.51e-24	1.11e-22	45.2434	DOWN
STK19	0.8172	9.52335	12.9279	1.65e-24	1.2e-22	45.1604	UP
RPL36AL	-0.971216	14.1041	-12.9239	1.68e-24	1.22e-22	45.1386	DOWN
SLC13A5	2.73898	5.75166	12.8958	1.96e-24	1.42e-22	44.9866	UP
MOGS	1.03339	9.04279	12.8832	2.1e-24	1.51e-22	44.9188	UP
ZNF692	1.68422	8.99956	12.8733	2.22e-24	1.59e-22	44.8651	UP
ATP5MD	-1.19629	14.5074	-12.852	2.49e-24	1.78e-22	44.7502	DOWN
ABCA7	1.84611	8.6241	12.8427	2.62e-24	1.87e-22	44.6998	UP
NFU1	-1.27629	11.2749	-12.8345	2.74e-24	1.94e-22	44.6552	DOWN
MDN1	1.30892	9.74027	12.8309	2.79e-24	1.98e-22	44.636	UP
HSPB11	-1.47646	13.0528	-12.8291	2.82e-24	1.99e-22	44.6259	DOWN
URM1	0.901252	9.78711	12.8177	3e-24	2.11e-22	44.5643	UP
LSM3	-1.41308	12.4927	-12.8047	3.22e-24	2.26e-22	44.4938	DOWN
CHMP2B	-1.20106	10.9991	-12.7866	3.56e-24	2.48e-22	44.3959	DOWN
NBEAL2	2.46367	8.90115	12.7814	3.66e-24	2.54e-22	44.368	UP
SLC12A9	1.0797	8.71977	12.7764	3.76e-24	2.61e-22	44.3407	UP
SLC34A3	1.6792	8.9716	12.7748	3.79e-24	2.62e-22	44.3325	UP
PLA2G6	1.23256	8.86555	12.774	3.81e-24	2.62e-22	44.3277	UP
POLDIP2	0.924146	10.7466	12.7693	3.91e-24	2.68e-22	44.3025	UP
C9orf85	-1.67592	9.87887	-12.7633	4.04e-24	2.76e-22	44.2699	DOWN
ENGASE	1.11558	9.69081	12.7437	4.49e-24	3.05e-22	44.164	UP
RP9	-1.48393	10.0039	-12.7436	4.5e-24	3.05e-22	44.1632	DOWN
H3C2	-3.30466	8.00736	-12.7353	4.71e-24	3.18e-22	44.1182	DOWN
SCAF1	2.62902	6.67093	12.681	6.33e-24	4.27e-22	43.8242	UP
PPP4R3A	1.32772	10.1864	12.6774	6.45e-24	4.34e-22	43.8049	UP
MPHOSPH10	-1.24688	10.5181	-12.6695	6.74e-24	4.52e-22	43.7619	DOWN
RAB3IL1	1.57685	8.58088	12.6689	6.76e-24	4.52e-22	43.7584	UP
UBE2V2	-1.3448	11.8494	-12.6654	6.89e-24	4.59e-22	43.7395	DOWN
RAP1B	-0.981983	13.7997	-12.6646	6.92e-24	4.59e-22	43.7355	DOWN
SNRPD2	-1.36467	14.8194	-12.6553	7.29e-24	4.82e-22	43.6848	DOWN
BMS1P1	1.83463	8.00347	12.6476	7.6e-24	5.01e-22	43.6432	UP
OGDH	2.4429	8.531	12.647	7.62e-24	5.01e-22	43.6396	UP
PDHB	-1.10292	12.9485	-12.6183	8.92e-24	5.84e-22	43.4841	DOWN
CDK9	1.34303	8.24473	12.6149	9.08e-24	5.93e-22	43.4659	UP
CLK2	1.3609	10.9676	12.6111	9.28e-24	6.01e-22	43.4452	UP
SLC38A10	1.26139	10.2462	12.6078	9.45e-24	6.1e-22	43.4272	UP
COX11	-1.54798	11.9439	-12.6014	9.78e-24	6.3e-22	43.3928	DOWN
TOMM40	1.19874	9.77635	12.5962	1.01e-23	6.46e-22	43.3643	UP
COPS5	-1.19006	12.2859	-12.5821	1.09e-23	6.96e-22	43.2879	DOWN
PGP	1.15339	10.0858	12.5735	1.14e-23	7.25e-22	43.241	UP
POLR2K	-1.51962	12.1132	-12.5671	1.18e-23	7.48e-22	43.2065	DOWN
ATN1	2.48209	7.33448	12.5626	1.21e-23	7.64e-22	43.1818	UP
NCOA3	-1.92694	11.4832	-12.5575	1.24e-23	7.83e-22	43.1544	DOWN
ATXN2L	2.2661	7.19039	12.5563	1.25e-23	7.86e-22	43.1476	UP
PNPLA6	1.79258	9.36189	12.5488	1.3e-23	8.17e-22	43.1071	UP
ARFGAP1	1.14453	9.32877	12.5459	1.33e-23	8.27e-22	43.0912	UP
OS9	1.29555	11.3476	12.5376	1.39e-23	8.63e-22	43.0463	UP
FLNA	2.08672	10.2708	12.5265	1.47e-23	9.14e-22	42.9861	UP
TIPRL	-1.59696	10.5472	-12.526	1.48e-23	9.14e-22	42.9833	DOWN
KLF16	2.80064	6.75357	12.5174	1.55e-23	9.55e-22	42.9364	UP
DVL3	1.91754	9.44093	12.5025	1.68e-23	1.03e-21	42.8559	UP
NFKB2	2.02454	8.18118	12.5011	1.69e-23	1.04e-21	42.8479	UP
ACTR6	-1.33394	11.1981	-12.5001	1.7e-23	1.04e-21	42.8427	DOWN
DND1	1.30668	9.14251	12.4895	1.8e-23	1.1e-21	42.785	UP
HCFC1	1.35364	9.81201	12.4887	1.81e-23	1.1e-21	42.7805	UP
WDR55	1.00073	9.7396	12.4857	1.84e-23	1.12e-21	42.7644	UP
TRIP10	1.82692	8.43596	12.4692	2.02e-23	1.22e-21	42.6749	UP
CHCHD1	-1.49842	12.3862	-12.4602	2.12e-23	1.27e-21	42.6259	DOWN
PDCD11	1.22373	9.7767	12.4577	2.15e-23	1.29e-21	42.6126	UP
APH1A	0.997229	11.1291	12.4573	2.15e-23	1.29e-21	42.61	UP
MAP2K7	1.41081	8.74726	12.4436	2.32e-23	1.38e-21	42.5359	UP
KDM5C	1.28738	8.90348	12.4388	2.38e-23	1.42e-21	42.5094	UP
GTF2IP20	3.17339	7.13536	12.4379	2.39e-23	1.42e-21	42.5047	UP
LOC100190986	2.03529	9.04742	12.4327	2.46e-23	1.46e-21	42.4764	UP
HAT1	-1.19709	12.1025	-12.4182	2.67e-23	1.57e-21	42.3977	DOWN
NMD3	-1.20608	12.5655	-12.4099	2.79e-23	1.64e-21	42.3524	DOWN
GOLGA1	1.36673	8.30674	12.3951	3.03e-23	1.77e-21	42.272	UP
CBFA2T2	1.80426	9.41388	12.3838	3.22e-23	1.88e-21	42.2107	UP
SEC24C	1.22406	10.6766	12.375	3.38e-23	1.97e-21	42.1626	UP
CTBS	-1.4891	10.0885	-12.3728	3.42e-23	1.99e-21	42.1506	DOWN
TBC1D22B	1.36637	8.96872	12.37	3.47e-23	2.01e-21	42.1353	UP
UNKL	1.60194	8.9748	12.3627	3.61e-23	2.09e-21	42.0959	UP
TRANK1	1.92952	8.95889	12.3622	3.62e-23	2.09e-21	42.0932	UP
FAM161B	1.12051	9.63163	12.3595	3.68e-23	2.11e-21	42.0783	UP
PRR14L	-2.07727	7.40875	-12.3559	3.75e-23	2.15e-21	42.059	DOWN
PPP4R3B	-0.975411	11.6024	-12.3288	4.35e-23	2.49e-21	41.9115	DOWN
AGRN	2.10915	7.688	12.323	4.49e-23	2.56e-21	41.8798	UP
CWC25	0.949334	9.18772	12.3161	4.67e-23	2.65e-21	41.8423	UP
ACAD9	0.92811	10.1913	12.2741	5.87e-23	3.33e-21	41.6139	UP
DHX38	2.08646	8.36392	12.2736	5.89e-23	3.33e-21	41.6108	UP
ZBTB40	1.16277	9.28918	12.2663	6.13e-23	3.45e-21	41.5712	UP
NEURL4	1.58795	7.73097	12.2582	6.41e-23	3.6e-21	41.5273	UP
TRIM21	1.50116	9.37349	12.253	6.6e-23	3.69e-21	41.4987	UP
SLC25A39	1.13832	10.7774	12.2273	7.6e-23	4.24e-21	41.3588	UP
USP36	1.09453	9.69248	12.2226	7.79e-23	4.33e-21	41.3333	UP
BBIP1	-1.30361	11.0255	-12.2224	7.8e-23	4.33e-21	41.3321	DOWN
RNF213	2.12329	10.0803	12.2122	8.25e-23	4.57e-21	41.2767	UP
GPAT4	1.36736	9.93231	12.2041	8.63e-23	4.77e-21	41.2322	UP
KMT2B	1.33256	9.19696	12.2031	8.67e-23	4.78e-21	41.2272	UP
TYMP	1.84269	9.94266	12.1864	9.51e-23	5.22e-21	41.1362	UP
SARS2	1.0768	8.86712	12.1728	1.02e-22	5.61e-21	41.0622	UP
INAFM1	1.19217	9.32676	12.1641	1.07e-22	5.87e-21	41.0148	UP
ZNF346	1.06858	9.20242	12.1538	1.14e-22	6.2e-21	40.9583	UP
ANAPC10	-1.36157	10.1301	-12.146	1.19e-22	6.45e-21	40.9159	DOWN
FAM160A2	1.17085	9.15271	12.1387	1.24e-22	6.7e-21	40.876	UP
GRIPAP1	2.26685	8.15848	12.1376	1.24e-22	6.72e-21	40.87	UP
TNK1	1.14222	8.40979	12.1358	1.26e-22	6.77e-21	40.8604	UP
GON7	-1.61702	10.8351	-12.1304	1.29e-22	6.95e-21	40.8306	DOWN
RBIS	-1.38942	12.7843	-12.1278	1.31e-22	7.04e-21	40.8164	DOWN
SLC1A5	1.33404	8.92056	12.122	1.35e-22	7.24e-21	40.7852	UP
MTMR3	1.17037	9.21093	12.1175	1.39e-22	7.41e-21	40.7602	UP
RBM14	1.39709	10.0729	12.1088	1.46e-22	7.73e-21	40.7129	UP
DAZAP1	1.40161	11.8183	12.1086	1.46e-22	7.73e-21	40.7121	UP
CSNK1A1	-0.759514	12.5508	-12.1075	1.47e-22	7.76e-21	40.7059	DOWN
MCUR1	-1.02814	11.2861	-12.1068	1.47e-22	7.77e-21	40.7022	DOWN
CYGB	1.06654	7.96963	12.1063	1.48e-22	7.77e-21	40.6993	UP
CAPN15	1.41565	8.42386	12.1039	1.5e-22	7.86e-21	40.6863	UP
COPS7B	1.62342	8.80729	12.0934	1.59e-22	8.3e-21	40.6288	UP
HM13	1.00401	9.58394	12.0869	1.64e-22	8.58e-21	40.5934	UP
NACA4P	1.56759	12.195	12.0707	1.8e-22	9.35e-21	40.5052	UP
MAN2A2	1.6363	9.23481	12.0701	1.8e-22	9.36e-21	40.5017	UP
NUP54	-1.10706	11.502	-12.0649	1.85e-22	9.61e-21	40.4734	DOWN
PSENEN	1.50186	9.16993	12.0619	1.88e-22	9.74e-21	40.4573	UP
CXXC1	1.29429	11.3188	12.0606	1.9e-22	9.79e-21	40.4502	UP
SLC25A11	1.12126	10.0841	12.0596	1.91e-22	9.81e-21	40.4449	UP
TRAPPC8	-0.995496	12.061	-12.0593	1.91e-22	9.81e-21	40.4432	DOWN
PPCS	-1.16672	10.7924	-12.0585	1.92e-22	9.83e-21	40.4384	DOWN
VAMP2	1.62844	8.91282	12.0449	2.07e-22	1.05e-20	40.3645	UP
WIPF2	1.16718	10.1455	12.0448	2.07e-22	1.05e-20	40.3638	UP
NDUFA3	-1.18399	12.5536	-12.0296	2.25e-22	1.14e-20	40.2811	DOWN
STRIP1	0.981799	9.53681	12.0105	2.5e-22	1.27e-20	40.1767	UP
ABHD16A	1.08029	9.52723	12.0044	2.59e-22	1.31e-20	40.1433	UP
CYB561D1	1.0736	9.17721	12.0003	2.65e-22	1.33e-20	40.121	UP
PHF8	1.24047	9.15613	12.0001	2.65e-22	1.33e-20	40.1198	UP
TTYH3	1.71023	8.96419	11.9996	2.66e-22	1.33e-20	40.1171	UP
KANSL1L	1.53723	8.03306	11.9973	2.69e-22	1.34e-20	40.105	UP
HINT1	-1.26977	14.6927	-11.996	2.71e-22	1.35e-20	40.0979	DOWN
TRIM26	1.37898	10.1278	11.9943	2.73e-22	1.36e-20	40.0886	UP
CYCS	-1.16841	14.0316	-11.9921	2.77e-22	1.37e-20	40.0763	DOWN
TBC1D25	1.37968	8.69612	11.9868	2.85e-22	1.41e-20	40.0474	UP
COX18	-0.944791	10.5258	-11.9843	2.89e-22	1.43e-20	40.0337	DOWN
STK25	1.0264	9.19103	11.9839	2.89e-22	1.43e-20	40.0318	UP
NSD3	-1.46629	10.8923	-11.9835	2.9e-22	1.43e-20	40.0294	DOWN
UBA1	1.96814	12.4675	11.98	2.96e-22	1.45e-20	40.0105	UP
ASXL2	1.28152	10.757	11.975	3.04e-22	1.49e-20	39.9829	UP
VPS39	1.38837	8.86235	11.9678	3.16e-22	1.54e-20	39.9437	UP
GPR137	1.42142	7.64573	11.9644	3.22e-22	1.57e-20	39.925	UP
GSKIP	-1.33343	11.6011	-11.9616	3.27e-22	1.59e-20	39.9101	DOWN
LGALS9	1.71863	9.09678	11.9551	3.39e-22	1.64e-20	39.8745	UP
OMA1	-1.05089	11.0961	-11.9483	3.52e-22	1.7e-20	39.837	DOWN
KCTD13	1.19669	8.47779	11.9447	3.59e-22	1.73e-20	39.8175	UP
ZNF236	1.28744	8.91781	11.935	3.79e-22	1.82e-20	39.7648	UP
PPP4C	1.11671	10.68	11.9207	4.1e-22	1.97e-20	39.6867	UP
CHMP1A	1.14839	9.92083	11.915	4.23e-22	2.02e-20	39.6556	UP
SORBS1	0.927905	9.78667	11.91	4.35e-22	2.08e-20	39.6282	UP
FNBP4	1.28767	10.8697	11.9038	4.5e-22	2.14e-20	39.594	UP
EDC4	1.61192	9.03489	11.9005	4.58e-22	2.18e-20	39.5764	UP
RETSAT	0.852162	8.9462	11.8763	5.23e-22	2.48e-20	39.4441	UP
TPCN1	1.88197	9.51277	11.8712	5.38e-22	2.54e-20	39.4164	UP
HSP90B1	-2.2558	11.8656	-11.8515	6e-22	2.83e-20	39.3084	DOWN
CAMK2G	1.06367	8.98167	11.846	6.18e-22	2.91e-20	39.2782	UP
TNPO1	-1.15484	13.0635	-11.8441	6.25e-22	2.93e-20	39.2681	DOWN
CCNG1	-1.25692	13.0252	-11.8418	6.33e-22	2.96e-20	39.2554	DOWN
ZFR	-0.869392	12.3757	-11.8412	6.35e-22	2.96e-20	39.252	DOWN
RPL15	-1.03923	15.457	-11.8383	6.45e-22	3e-20	39.2366	DOWN
B3GALT6	1.06844	9.46824	11.8379	6.47e-22	3e-20	39.234	UP
SPCS3	-0.929635	12.7596	-11.8279	6.83e-22	3.17e-20	39.1796	DOWN
BMT2	-1.2759	9.8446	-11.8243	6.97e-22	3.22e-20	39.1597	DOWN
ZDHHC8	1.8378	8.62452	11.8233	7.01e-22	3.23e-20	39.1546	UP
TAPBP	1.83112	11.9128	11.8204	7.12e-22	3.28e-20	39.1386	UP
LMF2	1.00102	10.0041	11.8193	7.16e-22	3.29e-20	39.1328	UP
NCOA5	1.26577	9.61115	11.814	7.38e-22	3.38e-20	39.1033	UP
OR1I1	1.29068	7.81411	11.8066	7.68e-22	3.51e-20	39.0631	UP
HAUS3	-0.951107	10.2978	-11.8057	7.72e-22	3.51e-20	39.0581	DOWN
PIP5K1C	1.55667	8.96481	11.8056	7.72e-22	3.51e-20	39.0579	UP
NLGN2	1.3503	8.18656	11.8043	7.78e-22	3.53e-20	39.0504	UP
EMSY	-1.20253	8.80423	-11.797	8.1e-22	3.67e-20	39.0108	DOWN
DGKZ	1.62341	9.8295	11.7851	8.65e-22	3.91e-20	38.9454	UP
SNRNP40	1.64601	8.81439	11.7741	9.19e-22	4.15e-20	38.8852	UP
UFD1	-1.02143	12.3368	-11.7631	9.77e-22	4.39e-20	38.8251	DOWN
CRIPT	-1.45219	11.0674	-11.7584	1e-21	4.5e-20	38.7997	DOWN
DCK	-1.52082	12.3588	-11.7577	1.01e-21	4.51e-20	38.7956	DOWN
SAMD4B	1.53856	8.77144	11.7571	1.01e-21	4.51e-20	38.7927	UP
CAP1	-0.77564	13.859	-11.7548	1.02e-21	4.56e-20	38.78	DOWN
RAB24	1.20441	9.84864	11.7544	1.02e-21	4.56e-20	38.7778	UP
CCDC59	-1.15287	11.2903	-11.7384	1.12e-21	4.96e-20	38.6902	DOWN
FBXL5	-1.1248	12.136	-11.7383	1.12e-21	4.96e-20	38.6897	DOWN
NOP9	1.1515	8.94092	11.7373	1.13e-21	4.98e-20	38.6842	UP
SREBF2	1.67635	9.33311	11.735	1.14e-21	5.03e-20	38.6717	UP
DMAC2L	-1.43127	10.5154	-11.7346	1.14e-21	5.03e-20	38.6695	DOWN
MAPK8IP3	1.64192	9.08149	11.7283	1.18e-21	5.2e-20	38.635	UP
SLC22A25	1.84852	7.78081	11.7053	1.34e-21	5.88e-20	38.5091	UP
CENPT	2.29679	7.59804	11.7051	1.34e-21	5.88e-20	38.5079	UP
KPNA4	-1.07477	11.581	-11.6935	1.43e-21	6.25e-20	38.4446	DOWN
HDAC10	2.217	7.42091	11.6933	1.43e-21	6.25e-20	38.4436	UP
NCSTN	1.03025	9.89145	11.6917	1.45e-21	6.29e-20	38.4348	UP
CAMTA2	1.04671	8.78771	11.6861	1.49e-21	6.47e-20	38.404	UP
D2HGDH	2.69386	7.86646	11.6846	1.5e-21	6.51e-20	38.3962	UP
MKLN1	1.18015	9.31097	11.6826	1.52e-21	6.57e-20	38.3849	UP
KXD1	0.861855	10.3973	11.6819	1.53e-21	6.58e-20	38.3814	UP
LAMTOR5	-1.1526	13.1159	-11.6811	1.53e-21	6.6e-20	38.377	DOWN
RINT1	-1.16823	10.2842	-11.6771	1.57e-21	6.73e-20	38.3548	DOWN
BOD1L1	1.38926	9.94009	11.6747	1.59e-21	6.81e-20	38.3416	UP
SLFN5	-1.93867	9.80534	-11.6574	1.75e-21	7.47e-20	38.2471	DOWN
NDUFS1	-0.88144	10.9699	-11.6557	1.76e-21	7.52e-20	38.238	DOWN
CDK2	1.15146	10.3623	11.6406	1.92e-21	8.16e-20	38.155	UP
RCE1	1.34988	8.06923	11.6387	1.94e-21	8.23e-20	38.145	UP
COX4I1	-0.784564	14.6409	-11.6322	2.01e-21	8.51e-20	38.1093	DOWN
SAFB	1.28025	9.83366	11.6157	2.2e-21	9.3e-20	38.0189	UP
PPP1R15A	1.45152	8.83968	11.5957	2.46e-21	1.04e-19	37.9094	UP
AMPD2	1.16011	9.52814	11.5896	2.54e-21	1.07e-19	37.8762	UP
NDUFB6	-1.2771	12.6306	-11.582	2.65e-21	1.11e-19	37.8345	DOWN
ANKRD54	0.953905	9.15709	11.5784	2.7e-21	1.13e-19	37.8146	UP
GALNT2	1.7326	10.3189	11.5762	2.74e-21	1.14e-19	37.803	UP
NFRKB	1.01076	8.94763	11.5723	2.8e-21	1.17e-19	37.7816	UP
RAVER1	1.4998	9.2385	11.5591	3.01e-21	1.25e-19	37.7091	UP
SMARCD2	0.992418	10.3387	11.5539	3.09e-21	1.29e-19	37.6809	UP
YTHDF3	-0.866158	11.8249	-11.551	3.15e-21	1.31e-19	37.6647	DOWN
GLYR1	1.05251	10.5854	11.5385	3.37e-21	1.4e-19	37.5961	UP
CDPF1	0.835907	8.38089	11.5315	3.5e-21	1.45e-19	37.5579	UP
DRAP1	1.1407	9.82355	11.5233	3.67e-21	1.51e-19	37.5129	UP
CAMK2B	1.19013	8.02261	11.5218	3.7e-21	1.52e-19	37.5048	UP
WWOX	0.928488	9.08108	11.5065	4.02e-21	1.65e-19	37.4214	UP
NRBF2	-1.18626	10.4415	-11.4891	4.43e-21	1.81e-19	37.3262	DOWN
DIPK2A	-1.19159	10.7799	-11.4877	4.46e-21	1.82e-19	37.318	DOWN
NBPF1	1.31785	11.511	11.4817	4.61e-21	1.88e-19	37.2854	UP
ADRM1	1.05961	10.8759	11.475	4.79e-21	1.95e-19	37.2485	UP
RECQL	-0.865753	11.9254	-11.471	4.89e-21	1.99e-19	37.2268	DOWN
RECK	1.27861	9.34597	11.4642	5.08e-21	2.06e-19	37.1897	UP
PTK2B	2.16147	8.95371	11.4624	5.13e-21	2.08e-19	37.1797	UP
CAAP1	-1.08798	11.2237	-11.4608	5.18e-21	2.09e-19	37.1708	DOWN
MIIP	1.01964	10.2369	11.4592	5.22e-21	2.1e-19	37.1624	UP
SKAP2	-1.42292	12.3098	-11.4582	5.25e-21	2.11e-19	37.1569	DOWN
SMNDC1	-0.939049	12.1727	-11.453	5.4e-21	2.17e-19	37.1284	DOWN
RPS25	-0.777597	15.073	-11.4528	5.41e-21	2.17e-19	37.1268	DOWN
PIGK	-1.08431	9.78584	-11.4502	5.49e-21	2.2e-19	37.1128	DOWN
RANGAP1	1.35963	9.26679	11.447	5.58e-21	2.23e-19	37.0953	UP
RNF40	1.64495	9.27037	11.4444	5.67e-21	2.26e-19	37.0809	UP
DPH3	-1.30145	10.5184	-11.4422	5.74e-21	2.28e-19	37.069	DOWN
IKBKG	0.94127	9.80376	11.4314	6.09e-21	2.42e-19	37.0098	UP
RPRD1B	1.53778	9.82124	11.4203	6.47e-21	2.56e-19	36.9491	UP
DDX18	-1.08538	11.9718	-11.4135	6.72e-21	2.66e-19	36.9116	DOWN
ATP5F1E	-0.820243	14.9324	-11.4128	6.75e-21	2.66e-19	36.9078	DOWN
UBFD1	1.1272	9.83713	11.4112	6.81e-21	2.68e-19	36.8992	UP
SSBP1	-0.972793	13.4529	-11.4097	6.86e-21	2.7e-19	36.8911	DOWN
MFF	-0.897868	12.1754	-11.4062	7e-21	2.74e-19	36.8719	DOWN
LZIC	-1.28071	9.55802	-11.4046	7.06e-21	2.76e-19	36.8632	DOWN
CHKA	1.85744	8.40956	11.4045	7.06e-21	2.76e-19	36.8622	UP
NDUFC1	-0.990887	13.0144	-11.4043	7.07e-21	2.76e-19	36.8612	DOWN
NAA35	-1.41082	9.41909	-11.3993	7.27e-21	2.83e-19	36.8338	DOWN
TUBA1A	-1.50253	13.2499	-11.397	7.36e-21	2.86e-19	36.8216	DOWN
MTDH	-1.28559	12.8242	-11.3957	7.41e-21	2.87e-19	36.8145	DOWN
SURF1	-1.07003	11.9223	-11.3942	7.47e-21	2.89e-19	36.8063	DOWN
CHD2	1.46952	9.52442	11.3941	7.48e-21	2.89e-19	36.8053	UP
TYK2	1.20531	10.4766	11.3935	7.51e-21	2.89e-19	36.8021	UP
RELT	1.48687	8.76634	11.3882	7.73e-21	2.97e-19	36.7734	UP
SUMO1	-0.894458	13.1557	-11.3782	8.17e-21	3.14e-19	36.7181	DOWN
TMEM126B	-1.41374	12.58	-11.3755	8.29e-21	3.18e-19	36.7037	DOWN
TMEM230	-0.856648	13.4077	-11.372	8.45e-21	3.23e-19	36.6847	DOWN
COMMD6	-1.17925	13.8367	-11.3711	8.49e-21	3.24e-19	36.6795	DOWN
PARP14	2.42467	9.39275	11.3671	8.68e-21	3.3e-19	36.6574	UP
DNTTIP2	-0.717784	11.862	-11.3511	9.48e-21	3.6e-19	36.57	DOWN
MRPL40	-0.962046	11.6458	-11.3385	1.02e-20	3.85e-19	36.5009	DOWN
RELB	1.09062	9.81512	11.3316	1.06e-20	4e-19	36.4629	UP
LCE1E	2.09899	7.38739	11.3203	1.12e-20	4.24e-19	36.4013	UP
RNF26	1.29287	9.26244	11.3077	1.21e-20	4.54e-19	36.3319	UP
TAF6	1.23288	10.0778	11.2993	1.26e-20	4.75e-19	36.2862	UP
ARHGAP4	1.517	9.36129	11.2933	1.31e-20	4.9e-19	36.2531	UP
DCUN1D1	-0.932244	11.3922	-11.2885	1.34e-20	5.02e-19	36.2268	DOWN
POLR2C	-0.809024	11.0145	-11.2873	1.35e-20	5.05e-19	36.2205	DOWN
CREB1	-0.925835	10.9656	-11.2831	1.38e-20	5.16e-19	36.197	DOWN
LZTR1	1.1655	9.08497	11.2827	1.38e-20	5.16e-19	36.1953	UP
FANCA	1.52121	9.52435	11.2794	1.41e-20	5.24e-19	36.1769	UP
HDGFL1	1.54816	8.36616	11.2771	1.43e-20	5.3e-19	36.1641	UP
SS18L2	-1.14747	12.4385	-11.2764	1.43e-20	5.31e-19	36.1604	DOWN
CARMIL2	1.85409	7.98681	11.2742	1.45e-20	5.37e-19	36.1485	UP
CLN5	-1.17829	10.4626	-11.2706	1.48e-20	5.46e-19	36.1288	DOWN
PLD2	1.26254	8.45107	11.2698	1.49e-20	5.48e-19	36.1245	UP
ARHGAP30	1.20167	11.4991	11.2689	1.49e-20	5.5e-19	36.1195	UP
STAT5A	1.30683	9.93561	11.2659	1.52e-20	5.58e-19	36.1028	UP
PIM1	2.23816	10.6191	11.2622	1.55e-20	5.68e-19	36.083	UP
TMED9	1.02794	10.8919	11.2605	1.56e-20	5.72e-19	36.0736	UP
FMNL1	1.99821	9.13314	11.2555	1.61e-20	5.88e-19	36.046	UP
DDOST	-0.827716	12.2028	-11.2538	1.62e-20	5.92e-19	36.0365	DOWN
ZNF836	1.27601	8.321	11.2476	1.68e-20	6.11e-19	36.0029	UP
LINC02603	-2.61089	6.09797	-11.2416	1.74e-20	6.31e-19	35.9698	DOWN
NEK7	-1.40925	11.9726	-11.2406	1.75e-20	6.33e-19	35.9643	DOWN
MRPL32	-1.15537	12.3717	-11.2385	1.77e-20	6.4e-19	35.9526	DOWN
DGLUCY	0.916978	9.6642	11.2334	1.82e-20	6.57e-19	35.925	UP
YY1	-0.885783	13.4726	-11.2276	1.88e-20	6.77e-19	35.8931	DOWN
CCDC18-AS1	2.15133	10.4137	11.2134	2.03e-20	7.31e-19	35.815	UP
PPP2R5D	1.11918	9.75964	11.2108	2.06e-20	7.39e-19	35.801	UP
EDNRB	-1.95745	8.93946	-11.2108	2.06e-20	7.39e-19	35.8007	DOWN
SZT2	1.88984	8.04932	11.2099	2.07e-20	7.41e-19	35.7959	UP
PPP4R2	-0.97956	11.5327	-11.2002	2.18e-20	7.81e-19	35.7427	DOWN
NLRC5	1.7598	10.8291	11.199	2.2e-20	7.84e-19	35.7365	UP
FAM53B	1.20487	10.0488	11.1955	2.24e-20	7.98e-19	35.717	UP
TMX1	-1.18029	12.932	-11.1889	2.32e-20	8.26e-19	35.681	DOWN
CDH22	1.38274	8.3785	11.1867	2.35e-20	8.35e-19	35.6688	UP
FBXL3	-1.02169	11.8442	-11.1794	2.45e-20	8.65e-19	35.6289	DOWN
RNF167	1.286	10.1381	11.1793	2.45e-20	8.65e-19	35.6285	UP
TRNT1	-1.14004	10.9194	-11.1793	2.45e-20	8.65e-19	35.6283	DOWN
HECTD3	1.4059	9.42469	11.1786	2.46e-20	8.68e-19	35.6242	UP
SMARCE1	-0.975527	12.3109	-11.1762	2.49e-20	8.78e-19	35.611	DOWN
SLC25A46	-1.04507	12.2171	-11.1749	2.51e-20	8.82e-19	35.604	DOWN
TENT4A	1.05562	10.4284	11.1712	2.56e-20	8.99e-19	35.5839	UP
R3HDM4	1.06451	11.8187	11.169	2.59e-20	9.08e-19	35.572	UP
RAB2A	-1.07892	11.1466	-11.1681	2.61e-20	9.11e-19	35.5666	DOWN
MRPL22	-1.09899	11.3162	-11.1657	2.64e-20	9.22e-19	35.5537	DOWN
LOC100507156	1.83618	6.84921	11.1613	2.71e-20	9.42e-19	35.5296	UP
TTC37	-0.998413	10.9531	-11.1612	2.71e-20	9.42e-19	35.5289	DOWN
SLC23A3	1.77687	7.5376	11.1606	2.72e-20	9.43e-19	35.5257	UP
HIKESHI	-1.39911	12.1241	-11.1493	2.89e-20	1e-18	35.4639	DOWN
GATD1	1.25423	9.22951	11.1301	3.22e-20	1.11e-18	35.3587	UP
MPV17L	1.76226	9.04973	11.1301	3.22e-20	1.11e-18	35.3587	UP
ALDH9A1	-0.892147	12.4005	-11.1297	3.22e-20	1.11e-18	35.3563	DOWN
PSMA4	-0.978033	13.4164	-11.1279	3.26e-20	1.12e-18	35.3463	DOWN
UHRF1BP1L	-1.16477	9.36392	-11.1274	3.27e-20	1.12e-18	35.3436	DOWN
LSM5	-1.25139	13.1538	-11.1272	3.27e-20	1.12e-18	35.3425	DOWN
DNAJB2	1.78024	8.77127	11.1231	3.34e-20	1.14e-18	35.3202	UP
DIS3	-0.995709	10.8361	-11.1227	3.35e-20	1.15e-18	35.3178	DOWN
NUMBL	1.32029	10.1746	11.1223	3.36e-20	1.15e-18	35.3158	UP
ARHGEF17	2.22247	5.16501	11.1196	3.41e-20	1.16e-18	35.301	UP
EIF3K	-0.890812	13.7383	-11.1143	3.51e-20	1.19e-18	35.2716	DOWN
ATXN7L3	1.35316	9.01389	11.1128	3.54e-20	1.2e-18	35.2639	UP
DDX54	1.07272	9.12549	11.1055	3.69e-20	1.25e-18	35.2237	UP
ALG14	-1.13205	9.61898	-11.1051	3.69e-20	1.25e-18	35.2213	DOWN
TMC6	1.40352	10.7177	11.104	3.72e-20	1.26e-18	35.2155	UP
CTDSP2	1.18559	11.507	11.1031	3.74e-20	1.26e-18	35.2104	UP
KLK3	1.40459	9.08677	11.0971	3.86e-20	1.3e-18	35.1776	UP
CAPN1	1.43488	9.2375	11.0954	3.9e-20	1.31e-18	35.1683	UP
LYAR	-1.89185	10.2263	-11.093	3.95e-20	1.33e-18	35.1548	DOWN
RNF13	-1.58852	11.9006	-11.0907	4e-20	1.34e-18	35.1426	DOWN
ARMC1	-1.23791	11.5218	-11.0874	4.08e-20	1.36e-18	35.1241	DOWN
SUPT6H	1.87043	9.00498	11.0848	4.13e-20	1.38e-18	35.1101	UP
FBXO8	-1.12491	9.50983	-11.0765	4.33e-20	1.44e-18	35.0644	DOWN
CIZ1	2.63495	8.45861	11.0763	4.33e-20	1.44e-18	35.0635	UP
PARP6	0.94229	10.347	11.0755	4.35e-20	1.45e-18	35.0588	UP
POFUT2	0.927633	8.78225	11.0729	4.41e-20	1.46e-18	35.0451	UP
PPA1	-1.12346	14.2525	-11.0729	4.41e-20	1.46e-18	35.045	DOWN
EFHC1	1.41456	8.80216	11.0693	4.5e-20	1.49e-18	35.0252	UP
GCLM	-1.20622	9.75377	-11.0546	4.89e-20	1.61e-18	34.9443	DOWN
COCH	1.13311	9.7062	11.0536	4.91e-20	1.62e-18	34.9392	UP
RPE	-1.04855	10.7155	-11.0533	4.92e-20	1.62e-18	34.9372	DOWN
HSBP1	-1.31544	12.4352	-11.0478	5.07e-20	1.66e-18	34.9074	DOWN
LACTB2	-2.01365	9.78481	-11.0472	5.09e-20	1.67e-18	34.904	DOWN
CACTIN	1.51267	8.29323	11.0456	5.13e-20	1.68e-18	34.8949	UP
MCPH1	-1.18583	8.72883	-11.0448	5.16e-20	1.68e-18	34.8908	DOWN
DOLPP1	0.934561	9.39307	11.0352	5.44e-20	1.77e-18	34.838	UP
CYTH1	1.39633	10.8069	11.0315	5.55e-20	1.81e-18	34.8178	UP
DCAF11	0.861695	9.78946	11.0285	5.64e-20	1.84e-18	34.8012	UP
HERPUD2	-0.963929	11.0747	-11.0273	5.68e-20	1.84e-18	34.7949	DOWN
PCGF5	-1.33147	11.2132	-11.0233	5.81e-20	1.88e-18	34.7727	DOWN
PATL1	1.35124	9.97626	11.0182	5.97e-20	1.93e-18	34.7448	UP
ENOPH1	-0.894275	12.0314	-11.0159	6.05e-20	1.96e-18	34.732	DOWN
KCNAB2	1.32729	9.72502	11.0125	6.16e-20	1.99e-18	34.7138	UP
COX5A	-0.941944	14.2357	-11.0086	6.3e-20	2.03e-18	34.6924	DOWN
DNPH1	0.872868	10.5759	11.0008	6.58e-20	2.12e-18	34.6493	UP
SETDB1	1.50979	9.64018	10.9983	6.67e-20	2.14e-18	34.6357	UP
PKM	1.76146	12.8933	10.9947	6.8e-20	2.18e-18	34.6161	UP
NOC2L	1.76452	8.546	10.9947	6.8e-20	2.18e-18	34.6157	UP
C12orf29	-1.43515	10.1319	-10.9941	6.82e-20	2.18e-18	34.6127	DOWN
PRR12	1.64345	8.27212	10.9926	6.88e-20	2.2e-18	34.6042	UP
APOL1	2.06675	8.9796	10.9915	6.93e-20	2.21e-18	34.5982	UP
RBM6	1.55536	10.4284	10.9874	7.08e-20	2.25e-18	34.5757	UP
SELENOF	-1.26905	12.832	-10.9854	7.16e-20	2.27e-18	34.5648	DOWN
PRKCI	-1.64177	10.2023	-10.9848	7.18e-20	2.28e-18	34.5618	DOWN
NCK1	-0.925186	11.3658	-10.9847	7.19e-20	2.28e-18	34.5609	DOWN
UBL3	-1.48374	10.3743	-10.9777	7.47e-20	2.36e-18	34.5228	DOWN
ELK1	1.12382	9.53903	10.9775	7.48e-20	2.36e-18	34.5216	UP
LRRFIP1	0.863422	12.4827	10.9759	7.55e-20	2.38e-18	34.5127	UP
BAZ2A	1.14536	8.9951	10.9717	7.73e-20	2.43e-18	34.4897	UP
ZER1	2.25431	7.4943	10.9703	7.79e-20	2.44e-18	34.4822	UP
WIZ	1.47757	8.5775	10.968	7.88e-20	2.47e-18	34.4696	UP
UBA3	-0.941848	12.3453	-10.9665	7.95e-20	2.49e-18	34.4612	DOWN
FKSG49	1.07427	10.0542	10.962	8.15e-20	2.55e-18	34.4365	UP
IL11RA	1.47033	7.7624	10.9563	8.41e-20	2.63e-18	34.4055	UP
SMG1P5	2.44718	7.76175	10.9555	8.45e-20	2.63e-18	34.4009	UP
MRS2	-1.2557	10.4803	-10.9548	8.48e-20	2.64e-18	34.3969	DOWN
TAOK2	1.91736	7.45904	10.9531	8.56e-20	2.66e-18	34.3877	UP
CNOT3	1.61319	8.79253	10.9525	8.59e-20	2.66e-18	34.3845	UP
EPN1	2.35118	7.5865	10.9467	8.87e-20	2.75e-18	34.3527	UP
SEC62	-1.49736	12.7287	-10.9456	8.93e-20	2.76e-18	34.3464	DOWN
IPO13	0.993251	8.77052	10.9395	9.23e-20	2.85e-18	34.3133	UP
PPP5C	1.67168	8.28517	10.9386	9.28e-20	2.86e-18	34.3081	UP
VPS35	-0.913694	12.4602	-10.9385	9.28e-20	2.86e-18	34.3078	DOWN
COPS9	-1.25623	12.722	-10.9373	9.35e-20	2.87e-18	34.3009	DOWN
SLAMF6	1.74548	9.63072	10.9334	9.55e-20	2.93e-18	34.2796	UP
ZNF875	1.34166	8.15218	10.9326	9.59e-20	2.93e-18	34.2753	UP
MOB2	0.897242	8.6095	10.9324	9.6e-20	2.93e-18	34.2741	UP
TXNDC9	-1.22072	12.3389	-10.9314	9.65e-20	2.94e-18	34.2689	DOWN
FKBP8	1.49582	7.83668	10.926	9.94e-20	3.02e-18	34.2394	UP
GNG11	-2.45141	10.4824	-10.9176	1.04e-19	3.16e-18	34.1929	DOWN
ERCC2	1.07357	8.3429	10.9158	1.05e-19	3.19e-18	34.1832	UP
NRBP1	1.69317	8.27761	10.9145	1.06e-19	3.21e-18	34.1758	UP
CYB5D1	1.1348	8.29814	10.91	1.09e-19	3.28e-18	34.1515	UP
KCNS1	1.96823	7.13575	10.9087	1.09e-19	3.3e-18	34.1443	UP
CC2D1A	1.09255	8.39389	10.8998	1.15e-19	3.46e-18	34.0956	UP
COASY	0.854594	10.6442	10.8992	1.15e-19	3.47e-18	34.092	UP
PTPA	1.12966	9.25814	10.8989	1.16e-19	3.47e-18	34.0906	UP
PIBF1	-1.04485	9.46026	-10.8979	1.16e-19	3.49e-18	34.0853	DOWN
NR1D2	-1.23879	9.1195	-10.8956	1.18e-19	3.53e-18	34.0726	DOWN
TRIM66	1.25445	8.13246	10.8952	1.18e-19	3.53e-18	34.07	UP
SMARCD1	1.16481	9.53508	10.8935	1.19e-19	3.56e-18	34.0612	UP
ACAP3	1.89444	7.89695	10.8805	1.28e-19	3.81e-18	33.9897	UP
SGSM2	1.09685	10.0896	10.8804	1.28e-19	3.81e-18	33.9888	UP
COLGALT1	1.06193	10.5887	10.8759	1.31e-19	3.9e-18	33.9645	UP
B4GALT2	1.10808	8.10065	10.868	1.37e-19	4.07e-18	33.9213	UP
KATNIP	1.13126	8.88699	10.8674	1.38e-19	4.08e-18	33.9179	UP
ST3GAL3	2.30895	8.42937	10.8653	1.39e-19	4.12e-18	33.9062	UP
MTIF3	-0.953868	10.6164	-10.8644	1.4e-19	4.13e-18	33.9014	DOWN
LOC401261	1.66847	7.76649	10.8586	1.44e-19	4.26e-18	33.8694	UP
ITM2B	-1.76467	13.6001	-10.851	1.51e-19	4.44e-18	33.8281	DOWN
SMIM15	-0.926087	12.0374	-10.8478	1.53e-19	4.51e-18	33.8101	DOWN
PKN1	1.9993	8.93632	10.8452	1.56e-19	4.57e-18	33.796	UP
PHYKPL	1.08268	9.78792	10.8445	1.56e-19	4.58e-18	33.7923	UP
R3HDM2	1.27164	10.0983	10.8364	1.63e-19	4.78e-18	33.7479	UP
RMND5B	1.10133	9.69518	10.8362	1.63e-19	4.78e-18	33.7466	UP
UBR4	1.35112	11.0404	10.8359	1.64e-19	4.78e-18	33.7448	UP
TPRA1	1.02031	8.53156	10.8234	1.75e-19	5.12e-18	33.6767	UP
ARHGEF11	2.13602	7.89554	10.8192	1.8e-19	5.23e-18	33.6535	UP
COMMD8	-1.28257	12.6682	-10.8077	1.91e-19	5.57e-18	33.5901	DOWN
RXRB	0.913911	9.9275	10.8044	1.95e-19	5.66e-18	33.5724	UP
DCAF17	1.62527	8.44468	10.8021	1.97e-19	5.73e-18	33.5597	UP
CFAP36	-1.18509	9.4756	-10.7987	2.01e-19	5.83e-18	33.5411	DOWN
MGRN1	1.09409	9.81882	10.7877	2.14e-19	6.17e-18	33.4807	UP
COX6B1	-0.88307	13.5302	-10.7839	2.18e-19	6.3e-18	33.4598	DOWN
ANO9	2.17836	8.26641	10.7827	2.2e-19	6.33e-18	33.453	UP
APPL1	-1.27391	9.99687	-10.7825	2.2e-19	6.33e-18	33.4523	DOWN
UBA2	-1.01175	12.6277	-10.7809	2.22e-19	6.37e-18	33.4436	DOWN
PIF1	1.30811	8.81161	10.7802	2.23e-19	6.38e-18	33.4396	UP
PPP2R3C	-0.957831	11.4444	-10.7802	2.23e-19	6.38e-18	33.4396	DOWN
SELENOK	-1.3912	12.5968	-10.774	2.31e-19	6.59e-18	33.4054	DOWN
ZNF675	-1.40854	8.0145	-10.7739	2.31e-19	6.59e-18	33.4048	DOWN
ZNF124	-1.72354	8.43532	-10.7716	2.34e-19	6.66e-18	33.3925	DOWN
IQGAP3	2.09024	7.49245	10.7709	2.35e-19	6.68e-18	33.3885	UP
CHTF18	1.20552	8.65389	10.7654	2.42e-19	6.87e-18	33.3582	UP
UBE2D3	-0.782169	14.0127	-10.7639	2.44e-19	6.91e-18	33.3501	DOWN
PMF1	1.0863	10.0592	10.7611	2.48e-19	7.01e-18	33.3345	UP
DGCR2	0.876556	9.69067	10.7569	2.53e-19	7.17e-18	33.312	UP
DNAJC11	1.15381	9.38479	10.7548	2.56e-19	7.24e-18	33.3002	UP
YEATS4	-1.48298	10.1904	-10.7488	2.65e-19	7.47e-18	33.2674	DOWN
ADNP2	-1.30754	9.96169	-10.7457	2.7e-19	7.59e-18	33.2505	DOWN
TMEM70	-1.17272	12.1558	-10.7449	2.71e-19	7.62e-18	33.2459	DOWN
DNAJB11	0.993385	11.4248	10.7439	2.72e-19	7.65e-18	33.2403	UP
ARF6	-1.23833	12.4732	-10.7399	2.78e-19	7.8e-18	33.2187	DOWN
SRSF5	0.972797	12.5467	10.7399	2.78e-19	7.8e-18	33.2186	UP
KRT2	2.2889	6.16562	10.7369	2.83e-19	7.91e-18	33.2023	UP
OGA	1.09289	11.4552	10.7357	2.85e-19	7.96e-18	33.1956	UP
RFX1	0.970983	9.41879	10.7308	2.93e-19	8.16e-18	33.1687	UP
TCHP	1.11546	10.0304	10.7274	2.98e-19	8.31e-18	33.1499	UP
MED9	1.15794	8.04523	10.7258	3.01e-19	8.37e-18	33.1409	UP
ATOX1	-1.12011	12.9	-10.7234	3.05e-19	8.47e-18	33.1277	DOWN
SETD5	1.37843	11.1216	10.7171	3.16e-19	8.76e-18	33.0935	UP
FOXK2	1.12358	9.35653	10.7146	3.2e-19	8.87e-18	33.08	UP
TRIO	1.52233	8.74544	10.7139	3.22e-19	8.89e-18	33.0759	UP
C1GALT1	-1.14854	10.2452	-10.7126	3.24e-19	8.94e-18	33.069	DOWN
RTRAF	-0.740379	13.9973	-10.7104	3.28e-19	9.04e-18	33.0569	DOWN
LOC101929172	2.24485	5.23871	10.7061	3.36e-19	9.25e-18	33.0329	UP
ITGAL	1.67452	10.2291	10.701	3.45e-19	9.5e-18	33.005	UP
LOC105374690	1.79158	7.19097	10.6984	3.5e-19	9.62e-18	32.991	UP
PDPR	1.30639	10.169	10.6968	3.53e-19	9.69e-18	32.9822	UP
ITPRIPL1	1.02926	8.08287	10.6724	4.04e-19	1.11e-17	32.8483	UP
PNRC2	-0.856517	13.3414	-10.6684	4.14e-19	1.13e-17	32.8262	DOWN
ELOC	-1.17031	12.9061	-10.6659	4.19e-19	1.15e-17	32.8126	DOWN
PITPNM1	1.95864	8.29996	10.6655	4.2e-19	1.15e-17	32.8107	UP
BAHD1	1.24321	8.27727	10.6619	4.29e-19	1.17e-17	32.7909	UP
ARID1A	1.4876	11.3134	10.6574	4.39e-19	1.2e-17	32.7663	UP
MEX3D	2.37458	6.43752	10.6571	4.4e-19	1.2e-17	32.7642	UP
RNA45SN5	2.45083	8.29439	10.6567	4.41e-19	1.2e-17	32.7621	UP
CENPB	1.23101	8.09339	10.6491	4.6e-19	1.25e-17	32.7205	UP
RNPS1	0.999306	12.3968	10.6483	4.62e-19	1.25e-17	32.7161	UP
RAB2B	0.961026	10.1689	10.6473	4.65e-19	1.26e-17	32.7105	UP
LOC155060	2.15862	8.42696	10.6396	4.85e-19	1.31e-17	32.6685	UP
PRKCSH	0.968697	11.0662	10.6394	4.85e-19	1.31e-17	32.6674	UP
DDX42	1.10958	10.9192	10.6367	4.93e-19	1.33e-17	32.6523	UP
TBC1D15	-0.77165	10.5288	-10.6361	4.94e-19	1.33e-17	32.6492	DOWN
RPL31	-0.85306	15.9396	-10.6296	5.13e-19	1.38e-17	32.6135	DOWN
ZNF277	-1.26744	10.6097	-10.6292	5.14e-19	1.38e-17	32.6113	DOWN
GLT8D1	-0.996342	10.6902	-10.6264	5.22e-19	1.4e-17	32.5961	DOWN
ASB16	2.07874	7.20061	10.6251	5.25e-19	1.4e-17	32.5892	UP
MRPL52	-1.15165	11.5342	-10.6235	5.3e-19	1.42e-17	32.5803	DOWN
DCAF8	1.27448	9.33029	10.6229	5.32e-19	1.42e-17	32.5767	UP
OR51I1	2.38282	5.4134	10.6212	5.37e-19	1.43e-17	32.5677	UP
PKMYT1	1.18936	9.61077	10.6206	5.39e-19	1.43e-17	32.5644	UP
IRF9	1.14746	11.0713	10.6161	5.52e-19	1.47e-17	32.5399	UP
TSPYL2	1.43335	9.67374	10.6157	5.54e-19	1.47e-17	32.5372	UP
RNF139	-0.886474	10.8215	-10.6128	5.62e-19	1.49e-17	32.5214	DOWN
RALB	1.28442	9.65092	10.6075	5.79e-19	1.53e-17	32.4925	UP
ERCC3	0.927588	9.32645	10.6047	5.88e-19	1.55e-17	32.4773	UP
HNRNPA1	0.930588	12.541	10.6015	5.99e-19	1.58e-17	32.4593	UP
TXLNA	1.57778	9.1886	10.5998	6.04e-19	1.59e-17	32.4501	UP
CRK	-0.861948	10.3055	-10.5935	6.26e-19	1.65e-17	32.4155	DOWN
COA8	-1.1077	10.0673	-10.5916	6.32e-19	1.66e-17	32.4054	DOWN
FBRS	1.44494	8.56782	10.5885	6.43e-19	1.69e-17	32.3882	UP
FAM98C	0.775924	8.67962	10.5828	6.64e-19	1.74e-17	32.3571	UP
ZNF335	1.9838	8.37539	10.5812	6.7e-19	1.75e-17	32.348	UP
ATXN7L3B	0.795771	10.941	10.5778	6.83e-19	1.78e-17	32.3296	UP
TNPO2	1.09953	10.5738	10.5777	6.83e-19	1.78e-17	32.3289	UP
FAM193A	1.14699	9.92717	10.5715	7.07e-19	1.84e-17	32.2949	UP
H1-4	-2.61124	7.36165	-10.5703	7.11e-19	1.85e-17	32.2886	DOWN
EHBP1L1	1.88538	8.71542	10.568	7.21e-19	1.87e-17	32.2759	UP
EIF1	-0.731202	15.3737	-10.5654	7.31e-19	1.9e-17	32.2617	DOWN
SMG7	1.36045	10.1384	10.5647	7.34e-19	1.9e-17	32.2576	UP
SDE2	-0.957877	11.5206	-10.5622	7.44e-19	1.93e-17	32.2442	DOWN
GOLGA7	-0.922228	12.2052	-10.5618	7.46e-19	1.93e-17	32.2417	DOWN
HPRT1	-1.15401	13.0002	-10.55	7.96e-19	2.06e-17	32.1772	DOWN
PSMD11	1.07735	11.6475	10.5486	8.02e-19	2.07e-17	32.1698	UP
THTPA	0.910851	9.05002	10.5396	8.43e-19	2.17e-17	32.1204	UP
PTBP1	0.887374	12.7021	10.5379	8.51e-19	2.19e-17	32.1107	UP
COA6	-1.22289	11.3183	-10.5377	8.52e-19	2.19e-17	32.1096	DOWN
ELF2	0.933727	9.69547	10.5343	8.68e-19	2.23e-17	32.0913	UP
ABCC5	1.00015	8.97979	10.5333	8.73e-19	2.24e-17	32.0859	UP
DCT	2.41566	5.6728	10.5324	8.77e-19	2.25e-17	32.0807	UP
RPL37	-0.879145	15.7189	-10.5214	9.32e-19	2.38e-17	32.0207	DOWN
ZNF14	-1.11425	9.26871	-10.5194	9.43e-19	2.41e-17	32.0093	DOWN
STYX	-1.10103	10.4483	-10.5183	9.49e-19	2.42e-17	32.0033	DOWN
MCRS1	0.844966	9.54042	10.5163	9.59e-19	2.44e-17	31.9926	UP
POP4	-0.885717	11.9949	-10.5119	9.83e-19	2.5e-17	31.9684	DOWN
SUPT16H	1.07999	11.2116	10.5085	1e-18	2.55e-17	31.9498	UP
CSNK1G3	-1.06067	9.86229	-10.5061	1.01e-18	2.58e-17	31.9363	DOWN
DPY30	-0.993872	12.1438	-10.5013	1.04e-18	2.64e-17	31.9101	DOWN
ATP6V1G1	-1.10524	13.0179	-10.5001	1.05e-18	2.66e-17	31.9037	DOWN
TWSG1	-1.64021	10.9115	-10.4975	1.06e-18	2.69e-17	31.8892	DOWN
KAT2A	1.09016	9.33886	10.4963	1.07e-18	2.71e-17	31.8828	UP
RALGAPB	0.891018	9.6705	10.4941	1.08e-18	2.74e-17	31.8705	UP
CAPRIN2	1.3746	9.288	10.4895	1.11e-18	2.8e-17	31.8456	UP
MICU2	-0.963121	12.1475	-10.4883	1.12e-18	2.82e-17	31.8391	DOWN
INTS6L	1.27382	9.66162	10.4881	1.12e-18	2.82e-17	31.838	UP
VHL	2.08191	7.40821	10.4847	1.14e-18	2.87e-17	31.819	UP
THAP1	-1.06599	9.25592	-10.4841	1.15e-18	2.87e-17	31.8159	DOWN
HERC1	0.910381	10.2322	10.4783	1.18e-18	2.96e-17	31.7845	UP
MPLKIP	-1.09666	11.6612	-10.4739	1.21e-18	3.03e-17	31.7603	DOWN
CISD1	-1.34925	11.3907	-10.4736	1.21e-18	3.03e-17	31.7582	DOWN
GBA2	1.39899	8.39054	10.4717	1.23e-18	3.06e-17	31.7481	UP
SLC35F5	-1.34769	10.2428	-10.469	1.25e-18	3.1e-17	31.7334	DOWN
SPCS1	-0.952478	13.6224	-10.4667	1.26e-18	3.14e-17	31.7207	DOWN
TSR2	1.05257	9.5155	10.4644	1.28e-18	3.17e-17	31.708	UP
RPL36	-1.05777	14.7549	-10.4636	1.28e-18	3.18e-17	31.7037	DOWN
STK36	1.4172	8.4115	10.4608	1.3e-18	3.23e-17	31.6881	UP
ZBTB17	1.14767	9.3269	10.4526	1.36e-18	3.37e-17	31.6433	UP
ERAL1	0.849594	9.73117	10.4474	1.4e-18	3.47e-17	31.6148	UP
RNMT	1.10789	9.92363	10.4428	1.44e-18	3.55e-17	31.5898	UP
HLA-G	1.47495	13.7609	10.4418	1.45e-18	3.57e-17	31.5841	UP
ELMOD3	2.03989	7.03027	10.4376	1.48e-18	3.65e-17	31.5611	UP
PSME1	-0.874598	13.501	-10.4324	1.52e-18	3.75e-17	31.5326	DOWN
CDC25B	1.22103	10.6571	10.425	1.59e-18	3.9e-17	31.4921	UP
LSP1	1.84173	10.1118	10.425	1.59e-18	3.9e-17	31.492	UP
POU2F2	1.78849	10.9116	10.419	1.64e-18	4.02e-17	31.459	UP
NDUFB5	-1.13807	13.2774	-10.4175	1.66e-18	4.05e-17	31.4512	DOWN
BMS1P2	1.37488	8.55285	10.4142	1.69e-18	4.12e-17	31.4331	UP
ACBD4	1.70983	7.94046	10.412	1.71e-18	4.17e-17	31.4207	UP
TRAPPC9	0.926409	9.64766	10.4108	1.72e-18	4.19e-17	31.4141	UP
TMEM106B	-1.29325	11.4274	-10.4101	1.73e-18	4.2e-17	31.4102	DOWN
CHID1	0.922773	9.09154	10.4071	1.75e-18	4.26e-17	31.3942	UP
YTHDC1	0.726219	11.8449	10.4055	1.77e-18	4.3e-17	31.3853	UP
FLOT2	1.23903	10.5482	10.4024	1.8e-18	4.37e-17	31.368	UP
CRAMP1	1.25245	8.36335	10.4021	1.8e-18	4.37e-17	31.3665	UP
SRP19	-0.842834	12.5778	-10.4003	1.82e-18	4.41e-17	31.3565	DOWN
UNC5B	1.06917	8.27199	10.3959	1.87e-18	4.51e-17	31.3324	UP
TMEM126A	-1.18364	12.2161	-10.3929	1.9e-18	4.58e-17	31.3163	DOWN
KLF13	1.4074	10.9985	10.3917	1.91e-18	4.6e-17	31.3099	UP
MTOR	1.23144	7.69088	10.3897	1.93e-18	4.65e-17	31.2987	UP
CCDC9	0.881054	8.367	10.3816	2.02e-18	4.86e-17	31.2541	UP
ZNF268	-1.47277	8.80072	-10.3801	2.04e-18	4.89e-17	31.246	DOWN
CWC22	-0.765732	10.3181	-10.3769	2.07e-18	4.97e-17	31.2286	DOWN
IKBIP	-1.13817	9.9624	-10.3745	2.1e-18	5.03e-17	31.2152	DOWN
PACS2	1.02474	10.4134	10.3745	2.1e-18	5.03e-17	31.2152	UP
STRADA	0.734663	10.9543	10.3711	2.14e-18	5.12e-17	31.197	UP
MYT1	1.77759	6.42787	10.3631	2.24e-18	5.34e-17	31.1528	UP
ARHGDIA	1.14713	11.4408	10.3618	2.25e-18	5.37e-17	31.146	UP
TEDC1	2.38134	6.42309	10.3616	2.26e-18	5.38e-17	31.1445	UP
TUBG2	1.3669	7.65457	10.3613	2.26e-18	5.38e-17	31.1431	UP
ATP5F1C	-0.787433	13.8624	-10.3553	2.33e-18	5.55e-17	31.1105	DOWN
SPG21	0.80764	11.5424	10.3512	2.39e-18	5.67e-17	31.0876	UP
FXR2	1.13059	9.02671	10.3511	2.39e-18	5.67e-17	31.0872	UP
VPS18	1.01278	8.70715	10.346	2.46e-18	5.83e-17	31.059	UP
TRIM11	1.01966	9.11828	10.3451	2.47e-18	5.85e-17	31.0545	UP
SUGP2	1.20325	9.96926	10.3426	2.51e-18	5.92e-17	31.0407	UP
NOS1	1.76495	6.7938	10.3387	2.56e-18	6.04e-17	31.0191	UP
MRPL13	-1.3119	11.5805	-10.333	2.64e-18	6.23e-17	30.9879	DOWN
PRPF6	1.04393	10.0259	10.3311	2.67e-18	6.29e-17	30.9776	UP
ATP6V1F	0.96409	11.7706	10.3275	2.72e-18	6.41e-17	30.9581	UP
POGZ	1.30494	9.84858	10.3268	2.73e-18	6.42e-17	30.9541	UP
TMEM267	-1.23498	9.7384	-10.3238	2.78e-18	6.52e-17	30.9378	DOWN
GOLGB1	1.09205	10.262	10.3196	2.84e-18	6.67e-17	30.9148	UP
FBXL19	2.23988	7.15097	10.3176	2.88e-18	6.73e-17	30.9039	UP
RPL24	-0.857949	15.5807	-10.3172	2.88e-18	6.74e-17	30.9016	DOWN
FAM219B	1.3267	9.65673	10.3115	2.97e-18	6.95e-17	30.8705	UP
KMT2A	1.08038	10.0365	10.3081	3.03e-18	7.07e-17	30.8517	UP
CCDC14	1.26207	10.2215	10.3056	3.07e-18	7.16e-17	30.8379	UP
MED12	1.28981	9.05475	10.3048	3.09e-18	7.18e-17	30.8338	UP
RPS27A	-0.782844	15.7592	-10.3005	3.16e-18	7.34e-17	30.8101	DOWN
SBF1	1.63385	9.7185	10.3	3.17e-18	7.36e-17	30.8073	UP
TAF6L	1.51271	6.84358	10.2985	3.2e-18	7.41e-17	30.799	UP
PRRC2B	1.65184	9.35684	10.2976	3.21e-18	7.43e-17	30.7944	UP
IQCB1	0.996341	10.0033	10.2968	3.23e-18	7.46e-17	30.7897	UP
ZFP92	2.2184	7.36322	10.2897	3.36e-18	7.75e-17	30.7509	UP
ATG3	-0.816583	12.4865	-10.2772	3.6e-18	8.3e-17	30.6824	DOWN
BCAS2	-0.976693	11.9331	-10.2759	3.62e-18	8.34e-17	30.6756	DOWN
CCDC17	2.44672	6.04516	10.2742	3.66e-18	8.41e-17	30.666	UP
WASHC3	-0.947158	11.3825	-10.2688	3.77e-18	8.66e-17	30.6363	DOWN
ZNF282	1.68286	8.3702	10.2654	3.84e-18	8.81e-17	30.6176	UP
AGPAT2	1.10787	8.94951	10.2617	3.92e-18	8.98e-17	30.5976	UP
TASL	-1.41961	9.0102	-10.2508	4.16e-18	9.53e-17	30.5379	DOWN
FAM160B2	1.34186	8.82171	10.2487	4.21e-18	9.63e-17	30.5264	UP
PHF14	-1.06507	11.0671	-10.2477	4.23e-18	9.68e-17	30.5208	DOWN
PTP4A2	-0.773979	14.0549	-10.2411	4.39e-18	1e-16	30.4847	DOWN
IRAK1BP1	-1.63727	8.04731	-10.2375	4.48e-18	1.02e-16	30.4652	DOWN
C17orf75	-1.11147	9.11448	-10.2318	4.62e-18	1.05e-16	30.4337	DOWN
RASSF7	0.723244	9.78392	10.2276	4.73e-18	1.08e-16	30.4107	UP
BSG	1.11438	10.0092	10.2273	4.74e-18	1.08e-16	30.4093	UP
TMEM214	1.18998	9.80799	10.2273	4.74e-18	1.08e-16	30.4091	UP
CAPZA2	-1.30283	12.5496	-10.2249	4.8e-18	1.09e-16	30.3962	DOWN
SEC31B	2.67771	7.33702	10.2238	4.83e-18	1.09e-16	30.39	UP
CCS	0.958217	9.32014	10.2215	4.89e-18	1.11e-16	30.3773	UP
ATP6V0C	1.0234	12.4137	10.2194	4.95e-18	1.12e-16	30.3662	UP
ADAM15	1.67276	7.98509	10.2181	4.98e-18	1.13e-16	30.359	UP
ZNF598	1.25126	9.03083	10.2134	5.12e-18	1.15e-16	30.3331	UP
PIP4K2B	0.955724	9.00567	10.2113	5.17e-18	1.17e-16	30.3218	UP
FAM162A	-1.36123	12.9494	-10.2101	5.21e-18	1.17e-16	30.3153	DOWN
SC5D	-1.23696	10.4681	-10.2101	5.21e-18	1.17e-16	30.3149	DOWN
TRIM67-AS1	1.14077	7.48013	10.2084	5.26e-18	1.18e-16	30.3058	UP
GABPB2	1.08415	9.07196	10.2055	5.34e-18	1.2e-16	30.2898	UP
UBE2I	0.788759	12.6825	10.2022	5.44e-18	1.22e-16	30.2719	UP
RAB11FIP3	1.08976	8.74632	10.1998	5.51e-18	1.23e-16	30.259	UP
RBM5	1.11558	11.617	10.1992	5.53e-18	1.24e-16	30.2553	UP
BTF3	-0.704332	14.8215	-10.1945	5.68e-18	1.27e-16	30.2299	DOWN
ANKRD40	0.994159	9.78142	10.193	5.73e-18	1.28e-16	30.2213	UP
SMIM30	-1.23792	10.3259	-10.1928	5.73e-18	1.28e-16	30.2202	DOWN
BAP1	1.11865	9.56809	10.1917	5.76e-18	1.28e-16	30.2147	UP
KDELR1	0.762775	11.6337	10.1902	5.81e-18	1.29e-16	30.2061	UP
ETFRF1	-1.32632	10.341	-10.1885	5.87e-18	1.3e-16	30.1967	DOWN
MCM3	1.32287	11.3193	10.186	5.95e-18	1.32e-16	30.1831	UP
ZCCHC9	-1.12173	10.6077	-10.1856	5.96e-18	1.32e-16	30.1813	DOWN
POR	1.18857	8.37994	10.1816	6.1e-18	1.35e-16	30.1589	UP
ZNF767P	1.31207	8.85253	10.1814	6.1e-18	1.35e-16	30.158	UP
TRAPPC10	1.31644	8.79037	10.1812	6.11e-18	1.35e-16	30.1568	UP
INPP5D	1.39675	11.5721	10.1786	6.2e-18	1.37e-16	30.1428	UP
PMPCB	-1.01033	12.4159	-10.178	6.22e-18	1.37e-16	30.1395	DOWN
CHURC1	-1.33898	12.2722	-10.1712	6.46e-18	1.42e-16	30.1021	DOWN
ZNF566	-1.46999	7.02471	-10.1664	6.63e-18	1.46e-16	30.0763	DOWN
KHDC4	1.01975	11.7517	10.1628	6.76e-18	1.49e-16	30.0563	UP
RNF220	0.984924	9.67067	10.1619	6.8e-18	1.49e-16	30.0516	UP
INIP	-0.957435	11.0619	-10.1591	6.9e-18	1.51e-16	30.0362	DOWN
ZC3H14	-1.0263	10.4857	-10.1587	6.92e-18	1.51e-16	30.034	DOWN
AMT	1.56083	8.30036	10.1586	6.92e-18	1.51e-16	30.0332	UP
TJAP1	0.85946	10.2324	10.1579	6.95e-18	1.52e-16	30.0294	UP
ORC4	-1.02588	10.7345	-10.1522	7.17e-18	1.56e-16	29.9983	DOWN
N6AMT1	-2.51044	6.8728	-10.1496	7.27e-18	1.59e-16	29.9844	DOWN
CBLL1	-0.991078	10.0732	-10.1479	7.34e-18	1.6e-16	29.975	DOWN
TNK2	1.66401	8.58996	10.1449	7.47e-18	1.62e-16	29.9582	UP
CHIC2	-0.921834	10.4233	-10.1384	7.74e-18	1.68e-16	29.9227	DOWN
PDIA6	1.03988	12.4173	10.1343	7.92e-18	1.72e-16	29.9003	UP
GNG5	-0.901732	13.7269	-10.1341	7.93e-18	1.72e-16	29.8991	DOWN
NCBP3	0.738238	9.34748	10.1328	7.98e-18	1.73e-16	29.8922	UP
YAE1	-1.09338	9.57388	-10.1313	8.05e-18	1.74e-16	29.884	DOWN
NAPA	0.94594	10.1106	10.1275	8.22e-18	1.77e-16	29.863	UP
GATAD2B	1.49145	9.33445	10.1262	8.28e-18	1.78e-16	29.8562	UP
MBTPS1	1.02424	9.87397	10.1255	8.31e-18	1.79e-16	29.8522	UP
RANBP10	1.07339	8.47258	10.1233	8.41e-18	1.81e-16	29.84	UP
DCTN6	-1.05817	11.0067	-10.1219	8.48e-18	1.82e-16	29.8327	DOWN
ICE2	-0.967897	10.3085	-10.1212	8.51e-18	1.83e-16	29.8287	DOWN
DHRS1	1.15101	9.39998	10.1187	8.63e-18	1.85e-16	29.8153	UP
CCDC88B	1.53311	9.5206	10.1186	8.63e-18	1.85e-16	29.8145	UP
FAM200B	-1.14932	10.2031	-10.1173	8.7e-18	1.86e-16	29.8074	DOWN
KDM3B	0.871147	10.4668	10.1169	8.71e-18	1.86e-16	29.8053	UP
LYRM1	-1.35333	11.9079	-10.1145	8.83e-18	1.89e-16	29.7918	DOWN
LOC101928255	2.00847	5.536	10.1119	8.96e-18	1.91e-16	29.7776	UP
CD47	-1.10346	13.5621	-10.1083	9.14e-18	1.95e-16	29.758	DOWN
AK3	-0.972108	12.6255	-10.1076	9.17e-18	1.95e-16	29.7544	DOWN
ADAMTSL4	1.82035	7.10479	10.1045	9.33e-18	1.98e-16	29.7372	UP
FIP1L1	-0.900051	10.0377	-10.1038	9.37e-18	1.99e-16	29.7334	DOWN
TRMT2B	1.7323	7.79644	10.1034	9.39e-18	1.99e-16	29.7316	UP
RNF32	1.52488	6.88372	10.1012	9.5e-18	2.01e-16	29.7196	UP
ZNF746	1.09995	9.51115	10.0988	9.63e-18	2.04e-16	29.7061	UP
RSL24D1	-1.32744	12.5358	-10.096	9.78e-18	2.07e-16	29.6909	DOWN
TVP23C	1.63155	7.75592	10.0791	1.07e-17	2.27e-16	29.5986	UP
MTA1	1.28218	10.8357	10.079	1.07e-17	2.27e-16	29.5977	UP
TEPSIN	1.03075	8.88517	10.0777	1.08e-17	2.28e-16	29.5905	UP
PIK3R1	-0.977072	10.5678	-10.0742	1.1e-17	2.32e-16	29.5718	DOWN
NDUFA12	-0.854534	13.6552	-10.0679	1.14e-17	2.4e-16	29.5372	DOWN
SLC26A6	1.74061	7.35599	10.0642	1.17e-17	2.45e-16	29.5171	UP
RUSC1	1.24373	9.53217	10.058	1.21e-17	2.53e-16	29.4833	UP
RNASEH2B	1.01109	8.89436	10.0574	1.21e-17	2.54e-16	29.48	UP
CSNK1G2	0.948731	10.5977	10.0569	1.21e-17	2.54e-16	29.4769	UP
ACTR1B	0.769521	10.1208	10.0569	1.21e-17	2.54e-16	29.4769	UP
C1D	-1.23556	11.5637	-10.0497	1.26e-17	2.64e-16	29.4379	DOWN
LCORL	-1.20358	9.57313	-10.0464	1.29e-17	2.69e-16	29.4199	DOWN
HACL1	-1.01485	10.1672	-10.0431	1.31e-17	2.73e-16	29.4016	DOWN
TMED10	-0.737257	13.1746	-10.0421	1.32e-17	2.74e-16	29.3963	DOWN
RAP2C	-0.955012	11.6986	-10.0403	1.33e-17	2.77e-16	29.3863	DOWN
GDPD3	2.23438	6.95187	10.0378	1.35e-17	2.81e-16	29.3727	UP
AMBP	2.21841	5.26439	10.0373	1.35e-17	2.81e-16	29.3696	UP
EIF2AK1	0.928295	11.9627	10.031	1.4e-17	2.91e-16	29.3357	UP
MEAF6	0.713786	10.6498	10.0291	1.41e-17	2.93e-16	29.3249	UP
NPFF	2.17717	7.00808	10.0277	1.43e-17	2.95e-16	29.3172	UP
NHLRC4	1.86185	7.71671	10.0243	1.45e-17	3.01e-16	29.2989	UP
RERE	1.39613	10.3905	10.0204	1.48e-17	3.07e-16	29.2773	UP
TBCA	-0.836434	13.7262	-10.0176	1.51e-17	3.11e-16	29.2625	DOWN
SRP54	0.662487	10.7627	10.0137	1.54e-17	3.18e-16	29.2407	UP
AARS2	1.09999	8.6626	10.0069	1.6e-17	3.29e-16	29.2037	UP
PIK3CD	1.55278	11.857	10.0063	1.6e-17	3.3e-16	29.2007	UP
CEP57	-0.910372	11.407	-10.0062	1.6e-17	3.3e-16	29.2	DOWN
OGT	0.989035	12.6463	9.99603	1.7e-17	3.49e-16	29.1444	UP
ATP5PF	-0.819756	13.7606	-9.99345	1.72e-17	3.53e-16	29.1303	DOWN
FAM220A	-1.06561	11.0096	-9.993	1.73e-17	3.54e-16	29.1278	DOWN
EIF6	0.739692	11.4057	9.9911	1.74e-17	3.57e-16	29.1174	UP
VPS26B	1.06635	8.36924	9.98876	1.77e-17	3.61e-16	29.1046	UP
MRPS36	-0.993131	11.9202	-9.98771	1.78e-17	3.63e-16	29.0989	DOWN
CACYBP	-0.924756	12.8686	-9.98497	1.8e-17	3.68e-16	29.0839	DOWN
ZBED6	-2.01649	7.09772	-9.98369	1.82e-17	3.7e-16	29.0769	DOWN
VAT1	1.32462	10.0002	9.98346	1.82e-17	3.71e-16	29.0757	UP
BET1L	0.930768	9.85329	9.98244	1.83e-17	3.72e-16	29.0701	UP
NBEAL1	-1.48564	7.18956	-9.98242	1.83e-17	3.72e-16	29.07	DOWN
ATP1B1	-2.48919	10.6591	-9.98143	1.84e-17	3.74e-16	29.0646	DOWN
MED15	1.1134	9.82512	9.97855	1.87e-17	3.79e-16	29.0488	UP
SNAPC4	1.78873	8.69298	9.9754	1.9e-17	3.85e-16	29.0316	UP
MTHFD2L	-1.46543	9.24613	-9.97529	1.9e-17	3.85e-16	29.031	DOWN
OTUD3	1.81307	7.57902	9.97247	1.93e-17	3.91e-16	29.0156	UP
SRGAP2C	-1.29099	8.88161	-9.97107	1.95e-17	3.94e-16	29.008	DOWN
AKT1	1.91269	9.34219	9.97036	1.96e-17	3.95e-16	29.0041	UP
ERGIC2	-1.24469	11.4337	-9.96747	1.99e-17	4.01e-16	28.9883	DOWN
SEC16A	1.00357	10.9893	9.96528	2.01e-17	4.05e-16	28.9763	UP
HNRNPUL1	1.10785	11.7118	9.96247	2.04e-17	4.11e-16	28.961	UP
SFR1	-1.12647	10.4803	-9.95808	2.09e-17	4.21e-16	28.937	DOWN
BRMS1	0.713479	10.3121	9.94831	2.21e-17	4.43e-16	28.8836	UP
LETMD1	0.90531	10.9286	9.94826	2.21e-17	4.43e-16	28.8834	UP
KCNIP2	1.89408	8.0065	9.94654	2.23e-17	4.47e-16	28.874	UP
UQCRB	-0.769419	14.2756	-9.94651	2.23e-17	4.47e-16	28.8738	DOWN
FUS	1.00366	11.78	9.9413	2.3e-17	4.59e-16	28.8453	UP
C11orf1	-1.34668	10.5964	-9.94088	2.3e-17	4.6e-16	28.843	DOWN
MRPL1	-1.21164	11.3026	-9.93287	2.41e-17	4.8e-16	28.7993	DOWN
AP2A2	0.79955	10.6693	9.92096	2.57e-17	5.12e-16	28.7343	UP
TPR	0.98239	11.0322	9.91915	2.59e-17	5.17e-16	28.7244	UP
CYBC1	0.830392	11.5709	9.91755	2.62e-17	5.21e-16	28.7156	UP
ARFRP1	1.06834	8.49687	9.91521	2.65e-17	5.27e-16	28.7029	UP
XDH	1.19027	7.46682	9.91393	2.67e-17	5.3e-16	28.6959	UP
CCDC157	1.73954	6.3853	9.91018	2.73e-17	5.41e-16	28.6754	UP
EIF4EBP2	0.860519	10.4996	9.90688	2.78e-17	5.5e-16	28.6574	UP
CD46	-0.962947	11.9023	-9.90669	2.78e-17	5.5e-16	28.6563	DOWN
SESTD1	-0.9787	8.92123	-9.90559	2.8e-17	5.53e-16	28.6503	DOWN
SOGA1	1.92439	8.26647	9.9041	2.82e-17	5.57e-16	28.6422	UP
LOC114224	1.94588	7.93961	9.90083	2.87e-17	5.67e-16	28.6243	UP
TMEM238L	1.14397	7.72771	9.89797	2.92e-17	5.75e-16	28.6087	UP
PLXNA3	1.79139	8.00977	9.89239	3.01e-17	5.92e-16	28.5783	UP
AK8	1.54036	7.36297	9.8885	3.07e-17	6.05e-16	28.557	UP
QRICH1	0.881863	10.03	9.88722	3.09e-17	6.08e-16	28.55	UP
ABCB6	1.84791	7.37043	9.88663	3.1e-17	6.1e-16	28.5468	UP
VBP1	-1.04532	13.1051	-9.87854	3.24e-17	6.37e-16	28.5026	DOWN
MAP1LC3B	-0.956022	11.7784	-9.8774	3.27e-17	6.4e-16	28.4964	DOWN
ITGB3BP	-1.35505	11.634	-9.8766	3.28e-17	6.42e-16	28.492	DOWN
TIMMDC1	-0.877508	12.2734	-9.87659	3.28e-17	6.42e-16	28.492	DOWN
TBC1D2B	1.15731	10.1477	9.87639	3.28e-17	6.42e-16	28.4909	UP
UBN1	-1.50833	9.49169	-9.86664	3.46e-17	6.77e-16	28.4377	DOWN
TPRKB	-1.25479	11.8877	-9.86521	3.49e-17	6.82e-16	28.4299	DOWN
GOLGA8A	2.20176	10.9642	9.86263	3.54e-17	6.91e-16	28.4158	UP
FLJ42627	1.18107	8.10452	9.86102	3.57e-17	6.96e-16	28.407	UP
INPP5B	1.28061	8.70187	9.86075	3.58e-17	6.96e-16	28.4055	UP
GPR107	0.951644	8.54448	9.85977	3.6e-17	7e-16	28.4002	UP
HSPB6	2.5627	5.93949	9.85687	3.66e-17	7.1e-16	28.3844	UP
CRBN	-1.05906	11.3502	-9.85482	3.7e-17	7.18e-16	28.3732	DOWN
SLC35A3	-1.17183	9.51616	-9.85411	3.71e-17	7.2e-16	28.3693	DOWN
HDAC2	-0.864247	11.3935	-9.85245	3.75e-17	7.26e-16	28.3603	DOWN
TUBB4A	2.41356	6.49222	9.85192	3.76e-17	7.27e-16	28.3573	UP
AK6	-1.04258	11.7186	-9.85156	3.76e-17	7.28e-16	28.3554	DOWN
LRP1	1.63191	8.21745	9.84998	3.8e-17	7.33e-16	28.3468	UP
SLC25A22	1.09275	8.57029	9.84385	3.93e-17	7.58e-16	28.3133	UP
NAA40	1.3011	9.43176	9.84184	3.97e-17	7.66e-16	28.3023	UP
RCC2	1.0907	11.8799	9.83783	4.06e-17	7.82e-16	28.2804	UP
ATXN3	-0.82425	9.12033	-9.83461	4.13e-17	7.95e-16	28.2629	DOWN
FHAD1	1.3656	8.05508	9.83331	4.16e-17	8e-16	28.2558	UP
LOC101929398	2.11008	6.3801	9.83207	4.19e-17	8.05e-16	28.249	UP
CER1	1.83263	6.2897	9.83147	4.21e-17	8.07e-16	28.2458	UP
UAP1L1	1.33006	8.74947	9.82994	4.24e-17	8.13e-16	28.2374	UP
THOC7	-1.09617	12.4437	-9.82661	4.32e-17	8.27e-16	28.2192	DOWN
GPN3	-1.05564	11.0458	-9.81819	4.52e-17	8.65e-16	28.1733	DOWN
PDCD10	-1.18932	13.2096	-9.81589	4.58e-17	8.75e-16	28.1607	DOWN
RPL14	-0.832082	14.9351	-9.81163	4.69e-17	8.95e-16	28.1375	DOWN
PNMA3	2.58373	7.17693	9.80981	4.74e-17	9.03e-16	28.1276	UP
SEC22B	0.799306	11.2601	9.80813	4.78e-17	9.1e-16	28.1184	UP
NOP2	0.944579	10.5817	9.80576	4.85e-17	9.22e-16	28.1055	UP
C1orf50	-1.09401	9.47809	-9.80429	4.88e-17	9.28e-16	28.0975	DOWN
SLC23A2	1.60073	9.33439	9.80385	4.9e-17	9.29e-16	28.0951	UP
SLC4A8	1.67001	7.87228	9.80376	4.9e-17	9.29e-16	28.0946	UP
UBL5	-1.03635	13.0173	-9.80268	4.93e-17	9.34e-16	28.0887	DOWN
RAPGEF1	1.49087	10.6603	9.79914	5.02e-17	9.51e-16	28.0694	UP
TRABD	1.24484	9.60549	9.79794	5.06e-17	9.57e-16	28.0629	UP
YME1L1	-0.784236	12.4855	-9.79467	5.15e-17	9.73e-16	28.045	DOWN
KLHL8	-0.9615	9.97133	-9.78966	5.29e-17	9.99e-16	28.0177	DOWN
TOX4	0.614112	10.342	9.78762	5.35e-17	1.01e-15	28.0066	UP
TSNAX	-0.952347	11.5511	-9.78139	5.54e-17	1.04e-15	27.9726	DOWN
SZRD1	0.803071	10.182	9.77611	5.7e-17	1.07e-15	27.9438	UP
CEBPZ	-0.925848	11.1537	-9.77512	5.74e-17	1.08e-15	27.9384	DOWN
CAVIN1	2.0339	8.76308	9.77478	5.75e-17	1.08e-15	27.9365	UP
ABL1	1.12796	9.86151	9.774	5.77e-17	1.08e-15	27.9323	UP
FAM83A	1.24998	8.09734	9.77381	5.78e-17	1.08e-15	27.9313	UP
TMSB4X	-0.786857	15.7659	-9.77368	5.78e-17	1.08e-15	27.9305	DOWN
COX6A1	-0.887095	14.4474	-9.76923	5.92e-17	1.11e-15	27.9063	DOWN
COL9A2	1.68188	8.53824	9.768	5.96e-17	1.12e-15	27.8996	UP
PWP2	1.07564	9.4637	9.76783	5.97e-17	1.12e-15	27.8986	UP
NIFK	-0.903176	12.2681	-9.75301	6.48e-17	1.21e-15	27.8179	DOWN
CYP2C9	1.89484	6.56271	9.75013	6.58e-17	1.23e-15	27.8021	UP
GTF3C6	-0.739855	12.5415	-9.74842	6.64e-17	1.24e-15	27.7928	DOWN
SLC35G1	1.07676	7.50908	9.74675	6.7e-17	1.25e-15	27.7837	UP
ZNF740	1.50202	8.02568	9.74615	6.73e-17	1.25e-15	27.7804	UP
SLC30A1	-1.2579	10.5602	-9.74587	6.74e-17	1.25e-15	27.7789	DOWN
ZNF589	1.70376	8.93492	9.74546	6.75e-17	1.25e-15	27.7767	UP
SPOUT1	0.933619	9.06832	9.74012	6.95e-17	1.29e-15	27.7476	UP
SETD9	-1.31217	8.85492	-9.7389	7e-17	1.29e-15	27.741	DOWN
COX5B	-0.800148	13.4862	-9.73737	7.06e-17	1.3e-15	27.7326	DOWN
NCAPD3	0.961941	10.0664	9.72968	7.36e-17	1.36e-15	27.6907	UP
TCP11L2	1.64783	7.6246	9.72936	7.38e-17	1.36e-15	27.6889	UP
DAGLB	0.841067	8.02727	9.72713	7.47e-17	1.38e-15	27.6768	UP
TAF1C	1.12545	8.90323	9.72598	7.52e-17	1.38e-15	27.6705	UP
RAB28	-0.836513	10.6649	-9.72382	7.61e-17	1.4e-15	27.6587	DOWN
INTS1	0.94089	9.61281	9.72346	7.62e-17	1.4e-15	27.6568	UP
FBXL6	1.37344	8.08595	9.72178	7.69e-17	1.41e-15	27.6476	UP
ZNF514	1.35853	8.1329	9.72004	7.77e-17	1.42e-15	27.6381	UP
COL11A2	1.14117	7.79085	9.71723	7.89e-17	1.45e-15	27.6228	UP
NECAP2	0.929108	11.2459	9.71711	7.89e-17	1.45e-15	27.6222	UP
NPLOC4	1.01077	10.1875	9.71545	7.96e-17	1.46e-15	27.6131	UP
EIF3F	-0.787983	14.416	-9.71541	7.97e-17	1.46e-15	27.6129	DOWN
TTC7A	1.28605	9.08036	9.70784	8.31e-17	1.52e-15	27.5717	UP
BEST1	1.92982	8.36453	9.70557	8.41e-17	1.53e-15	27.5593	UP
KLHL7	-0.848216	10.28	-9.69713	8.81e-17	1.61e-15	27.5133	DOWN
TMEM161A	0.973914	10.044	9.69595	8.87e-17	1.61e-15	27.5069	UP
ZNF611	0.990302	9.45739	9.68823	9.25e-17	1.68e-15	27.4648	UP
THOC6	1.5439	8.26471	9.68765	9.28e-17	1.69e-15	27.4617	UP
TRPC4AP	0.943714	8.73823	9.68202	9.57e-17	1.74e-15	27.431	UP
MDH1	-0.996024	13.8736	-9.67994	9.68e-17	1.76e-15	27.4197	DOWN
ZNHIT3	-0.972574	11.5024	-9.67695	9.84e-17	1.78e-15	27.4034	DOWN
LAMTOR3	-0.99673	11.5472	-9.67621	9.88e-17	1.79e-15	27.3993	DOWN
PTMS	2.46584	6.09828	9.67561	9.92e-17	1.79e-15	27.3961	UP
ABRAXAS1	-1.2363	9.2024	-9.67064	1.02e-16	1.84e-15	27.369	DOWN
ADCK1	1.29315	8.07103	9.66964	1.02e-16	1.85e-15	27.3635	UP
CTSD	1.55682	11.0865	9.66825	1.03e-16	1.86e-15	27.356	UP
CEP170B	1.28519	7.87428	9.6672	1.04e-16	1.87e-15	27.3503	UP
SCAMP4	1.87969	7.96055	9.66282	1.06e-16	1.92e-15	27.3264	UP
ZCCHC10	-1.11387	10.9969	-9.66156	1.07e-16	1.93e-15	27.3196	DOWN
RNF207	1.42921	7.81302	9.65994	1.08e-16	1.94e-15	27.3108	UP
ATF1	-1.13264	10.831	-9.65722	1.1e-16	1.97e-15	27.2959	DOWN
GET4	1.14957	8.95752	9.65548	1.11e-16	1.99e-15	27.2865	UP
MIGA2	1.25078	8.196	9.65486	1.11e-16	1.99e-15	27.2831	UP
SLC4A2	2.06523	7.7209	9.65375	1.12e-16	2e-15	27.277	UP
HSCB	-1.15726	10.6449	-9.65371	1.12e-16	2e-15	27.2768	DOWN
CDC42SE2	-0.761719	13.421	-9.65353	1.12e-16	2e-15	27.2758	DOWN
ABCA2	1.66573	7.72806	9.64997	1.14e-16	2.04e-15	27.2565	UP
SGSH	1.08772	9.6852	9.64844	1.15e-16	2.05e-15	27.2481	UP
ZNF316	1.15181	7.9314	9.64808	1.15e-16	2.06e-15	27.2462	UP
SETX	1.08072	10.3586	9.64428	1.18e-16	2.1e-15	27.2255	UP
ZNF592	0.82249	9.29451	9.6433	1.18e-16	2.11e-15	27.2202	UP
ATMIN	-0.893961	10.4994	-9.64063	1.2e-16	2.14e-15	27.2056	DOWN
POLM	2.51687	7.50365	9.6402	1.2e-16	2.14e-15	27.2033	UP
CWC15	-0.893465	12.584	-9.64005	1.21e-16	2.14e-15	27.2024	DOWN
EXOC3	0.916725	9.66912	9.63963	1.21e-16	2.14e-15	27.2002	UP
CORO7	1.50645	8.36753	9.63113	1.27e-16	2.24e-15	27.1539	UP
CABIN1	1.23154	9.52721	9.62962	1.28e-16	2.26e-15	27.1457	UP
EMC8	-0.86687	11.2569	-9.62759	1.29e-16	2.28e-15	27.1346	DOWN
RNFT1	-1.31597	10.0072	-9.62658	1.3e-16	2.29e-15	27.1291	DOWN
SF3B3	1.1355	10.965	9.62632	1.3e-16	2.3e-15	27.1277	UP
LOC100652768	2.3676	5.81382	9.62516	1.31e-16	2.31e-15	27.1214	UP
ARMC8	0.802425	9.62702	9.62289	1.33e-16	2.33e-15	27.109	UP
TGFB3	1.10497	8.24997	9.62277	1.33e-16	2.33e-15	27.1084	UP
CLASRP	1.08834	10.0258	9.62274	1.33e-16	2.33e-15	27.1082	UP
CAPN10	2.06751	7.53267	9.62208	1.33e-16	2.34e-15	27.1046	UP
COG3	0.758042	8.78424	9.61771	1.36e-16	2.39e-15	27.0808	UP
TNFAIP2	1.92865	10.3867	9.61714	1.37e-16	2.4e-15	27.0777	UP
IGFBP4	2.44293	9.19407	9.61671	1.37e-16	2.4e-15	27.0754	UP
PRRC2A	1.67707	9.50925	9.60948	1.43e-16	2.5e-15	27.036	UP
DEGS1	-1.12943	12.0373	-9.60664	1.45e-16	2.53e-15	27.0206	DOWN
ARF1	2.07103	7.2491	9.60574	1.46e-16	2.54e-15	27.0157	UP
BTN2A1	0.952044	9.85228	9.6031	1.48e-16	2.58e-15	27.0013	UP
STAT6	0.972184	12.2776	9.59762	1.52e-16	2.66e-15	26.9715	UP
RPS6KA4	1.16415	8.74177	9.59667	1.53e-16	2.67e-15	26.9663	UP
ZNF333	1.12804	7.04992	9.5963	1.53e-16	2.67e-15	26.9643	UP
TMEM205	0.837294	10.231	9.59501	1.54e-16	2.69e-15	26.9573	UP
ACOX1	-0.925733	9.46213	-9.59441	1.55e-16	2.69e-15	26.954	DOWN
ZNF419	0.764118	9.58328	9.59316	1.56e-16	2.71e-15	26.9472	UP
VPS26A	-0.65313	12.2044	-9.58812	1.6e-16	2.78e-15	26.9198	DOWN
LOC100129129	1.36191	7.84578	9.5853	1.63e-16	2.82e-15	26.9045	UP
HGH1	0.927143	9.91149	9.58278	1.65e-16	2.86e-15	26.8908	UP
AP2A1	1.9325	7.24865	9.5826	1.65e-16	2.86e-15	26.8898	UP
MYBBP1A	0.925942	9.40405	9.58179	1.66e-16	2.87e-15	26.8854	UP
ANAPC11	-1.11101	12.5029	-9.58099	1.67e-16	2.88e-15	26.881	DOWN
NAXD	0.971228	10.1757	9.58078	1.67e-16	2.88e-15	26.8799	UP
PPP1R12C	1.292	8.93836	9.57925	1.68e-16	2.9e-15	26.8716	UP
HRH2	2.01387	5.68156	9.57863	1.69e-16	2.91e-15	26.8682	UP
BRSK1	1.83004	7.54563	9.57851	1.69e-16	2.91e-15	26.8675	UP
SBNO2	2.41427	8.09026	9.57222	1.75e-16	3.01e-15	26.8334	UP
KCTD6	-1.60513	10.5437	-9.56764	1.79e-16	3.09e-15	26.8084	DOWN
FBXL20	0.929963	9.12534	9.56593	1.81e-16	3.11e-15	26.7991	UP
ITGB1BP1	-1.01922	11.3732	-9.56382	1.83e-16	3.14e-15	26.7877	DOWN
TWF1	-0.941107	10.8484	-9.56376	1.83e-16	3.14e-15	26.7873	DOWN
TMEM223	-0.995023	10.5938	-9.56369	1.83e-16	3.14e-15	26.7869	DOWN
IFNA17	1.95317	7.05356	9.56032	1.87e-16	3.2e-15	26.7686	UP
PGM2L1	-1.40826	8.36426	-9.55852	1.89e-16	3.22e-15	26.7588	DOWN
BTF3L4	-0.998084	11.4601	-9.55801	1.89e-16	3.23e-15	26.756	DOWN
PFN1	1.01556	14.0481	9.55681	1.9e-16	3.25e-15	26.7495	UP
AKT1S1	2.34674	7.30323	9.5562	1.91e-16	3.26e-15	26.7462	UP
SNAPC1	-1.47308	10.4868	-9.55468	1.93e-16	3.28e-15	26.7379	DOWN
OR1J2	2.04433	6.09892	9.54859	1.99e-16	3.39e-15	26.7048	UP
CEPT1	-1.00372	10.9553	-9.54372	2.05e-16	3.48e-15	26.6783	DOWN
ECE1	1.39462	8.79804	9.54272	2.06e-16	3.49e-15	26.6729	UP
CMC1	-1.41289	11.5235	-9.54227	2.06e-16	3.5e-15	26.6705	DOWN
LTO1	1.79742	6.73821	9.53934	2.1e-16	3.55e-15	26.6545	UP
NXF1	0.9993	10.7192	9.53562	2.14e-16	3.62e-15	26.6343	UP
NLRP8	2.08719	6.11091	9.53542	2.14e-16	3.62e-15	26.6332	UP
KIFC2	2.18142	7.91006	9.53437	2.15e-16	3.64e-15	26.6275	UP
WDR6	1.03255	10.2932	9.53122	2.19e-16	3.7e-15	26.6104	UP
ATG2B	0.886063	9.48447	9.52607	2.26e-16	3.8e-15	26.5824	UP
MTHFSD	1.22416	7.54913	9.52506	2.27e-16	3.81e-15	26.5769	UP
USP5	1.75629	7.59248	9.52344	2.29e-16	3.84e-15	26.5681	UP
KMT5A	0.969136	10.3042	9.52103	2.32e-16	3.89e-15	26.555	UP
OR51B6	1.58075	6.44999	9.52	2.33e-16	3.91e-15	26.5494	UP
ITPR3	1.78581	9.68337	9.51926	2.34e-16	3.92e-15	26.5454	UP
DTNBP1	0.938417	11.0153	9.51904	2.34e-16	3.92e-15	26.5442	UP
SERPINB10	2.50526	5.20312	9.51872	2.35e-16	3.93e-15	26.5424	UP
HELZ2	1.71771	6.94454	9.51677	2.37e-16	3.97e-15	26.5319	UP
ZNF573	-1.46754	8.57776	-9.51142	2.44e-16	4.08e-15	26.5028	DOWN
BANF1	0.871397	12.1734	9.51107	2.45e-16	4.09e-15	26.5008	UP
CASP8	0.979186	10.1261	9.5109	2.45e-16	4.09e-15	26.4999	UP
C20orf181	1.99066	6.56373	9.50764	2.5e-16	4.16e-15	26.4822	UP
ARR3	2.08195	6.23129	9.5075	2.5e-16	4.16e-15	26.4814	UP
LINC02591	2.13887	7.11597	9.50689	2.51e-16	4.17e-15	26.4781	UP
NIT1	0.90574	10.2414	9.50666	2.51e-16	4.17e-15	26.4769	UP
RUSF1	1.14424	8.61453	9.50443	2.54e-16	4.21e-15	26.4648	UP
TMC2	1.81003	5.66287	9.50433	2.54e-16	4.21e-15	26.4642	UP
MYG1	0.766781	10.2776	9.50259	2.57e-16	4.25e-15	26.4548	UP
OXER1	1.48879	7.9274	9.49968	2.61e-16	4.31e-15	26.439	UP
DCTN4	-0.697151	11.1787	-9.49869	2.62e-16	4.33e-15	26.4336	DOWN
MTFR1	-1.12035	10.0234	-9.49765	2.64e-16	4.36e-15	26.4279	DOWN
PI4KA	0.885462	9.86062	9.49717	2.64e-16	4.36e-15	26.4253	UP
IL18	-1.73066	11.0069	-9.49577	2.66e-16	4.39e-15	26.4177	DOWN
CD4	1.47468	10.0318	9.49503	2.67e-16	4.41e-15	26.4137	UP
FANCG	0.930886	9.69013	9.49424	2.69e-16	4.42e-15	26.4094	UP
UPF1	1.07253	10.0208	9.4902	2.75e-16	4.52e-15	26.3875	UP
DHX37	1.39384	8.65648	9.48596	2.81e-16	4.62e-15	26.3644	UP
MAP7D1	0.953996	10.1999	9.48216	2.87e-16	4.72e-15	26.3438	UP
CCDC15	-1.28256	7.70985	-9.48147	2.88e-16	4.73e-15	26.34	DOWN
NDUFV2	-1.02845	13.0158	-9.48102	2.89e-16	4.74e-15	26.3376	DOWN
SNX1	0.789564	10.7383	9.47919	2.92e-16	4.78e-15	26.3277	UP
GIT1	1.16881	8.96304	9.47864	2.93e-16	4.79e-15	26.3247	UP
MMADHC	-0.813873	13.4261	-9.4783	2.93e-16	4.8e-15	26.3228	DOWN
ZNF585B	1.17149	8.13224	9.47767	2.94e-16	4.81e-15	26.3194	UP
TOMM20	-1.22071	12.8355	-9.47693	2.95e-16	4.83e-15	26.3154	DOWN
ATF2	-0.946054	10.9082	-9.47497	2.99e-16	4.87e-15	26.3047	DOWN
SAR1B	-1.10069	11.3387	-9.46804	3.1e-16	5.06e-15	26.2671	DOWN
TMEM167A	-1.0645	12.505	-9.46764	3.11e-16	5.07e-15	26.2649	DOWN
ULK3	1.0913	8.71992	9.46581	3.14e-16	5.11e-15	26.255	UP
MRPL2	0.86342	9.30051	9.46508	3.15e-16	5.13e-15	26.251	UP
HCLS1	1.079	12.9199	9.46239	3.2e-16	5.2e-15	26.2364	UP
HAUS2	-1.20972	10.0019	-9.46156	3.21e-16	5.22e-15	26.2319	DOWN
JUNB	1.3891	9.99947	9.45524	3.33e-16	5.4e-15	26.1976	UP
PSG6	1.89297	6.51294	9.45483	3.33e-16	5.4e-15	26.1953	UP
MCM3AP	1.15471	10.4338	9.4481	3.46e-16	5.6e-15	26.1588	UP
NPM1	-0.657149	15.3135	-9.44774	3.47e-16	5.61e-15	26.1568	DOWN
RGS10	-1.10766	12.7769	-9.44734	3.47e-16	5.62e-15	26.1547	DOWN
PRPS2	-0.923055	11.4516	-9.4471	3.48e-16	5.62e-15	26.1533	DOWN
RPS7	-0.789587	15.4658	-9.44173	3.58e-16	5.78e-15	26.1242	DOWN
ZNRF2	-1.26282	9.47913	-9.43803	3.66e-16	5.9e-15	26.1041	DOWN
POLR2A	1.64236	9.84387	9.43688	3.68e-16	5.93e-15	26.0979	UP
MKS1	0.976084	7.73801	9.43664	3.68e-16	5.93e-15	26.0966	UP
NOMO3	2.03738	7.66279	9.43419	3.73e-16	6.01e-15	26.0833	UP
ASF1A	-1.25733	10.1572	-9.43393	3.74e-16	6.01e-15	26.0818	DOWN
ANKZF1	1.36269	8.86482	9.42734	3.88e-16	6.23e-15	26.0461	UP
SH3BP1	1.15282	8.58546	9.42587	3.91e-16	6.27e-15	26.0381	UP
KIAA0100	1.10424	10.3039	9.42163	4e-16	6.42e-15	26.0151	UP
FBXO30-DT	-1.61211	6.41231	-9.42133	4.01e-16	6.42e-15	26.0135	DOWN
C2orf76	-1.25201	9.59593	-9.41865	4.07e-16	6.51e-15	25.9989	DOWN
STK4	0.896099	12.0529	9.41507	4.15e-16	6.63e-15	25.9795	UP
ERLEC1	-0.883827	11.8168	-9.41142	4.23e-16	6.76e-15	25.9597	DOWN
AGAP6	2.26428	5.98897	9.40702	4.33e-16	6.92e-15	25.9358	UP
EDEM3	-1.13524	10.1167	-9.40613	4.35e-16	6.95e-15	25.931	DOWN
ZNF585A	-1.73709	9.35985	-9.40488	4.38e-16	6.99e-15	25.9242	DOWN
NKAPD1	0.768155	9.35598	9.40467	4.39e-16	6.99e-15	25.9231	UP
COX7A2	-1.16774	13.8855	-9.40379	4.41e-16	7.02e-15	25.9183	DOWN
SPSB3	0.720508	10.8709	9.40218	4.45e-16	7.07e-15	25.9096	UP
CD34	1.61215	7.74869	9.39933	4.52e-16	7.18e-15	25.8941	UP
EFNB3	1.46577	7.09961	9.39712	4.57e-16	7.26e-15	25.8821	UP
ENY2	-1.06491	12.5952	-9.39443	4.64e-16	7.36e-15	25.8675	DOWN
TBC1D17	2.06644	7.3817	9.39383	4.66e-16	7.38e-15	25.8642	UP
SS18L1	0.948695	9.33809	9.3936	4.66e-16	7.39e-15	25.863	UP
NADSYN1	0.902621	10.0134	9.39234	4.7e-16	7.43e-15	25.8561	UP
BCAN	1.68001	7.41214	9.39173	4.71e-16	7.45e-15	25.8528	UP
DERA	-0.805116	11.0964	-9.38285	4.95e-16	7.82e-15	25.8047	DOWN
NFS1	0.808403	9.52344	9.38111	4.99e-16	7.88e-15	25.7953	UP
HSPA13	-1.00599	10.2881	-9.38033	5.02e-16	7.91e-15	25.791	DOWN
HSPE1	-1.11322	13.2831	-9.38031	5.02e-16	7.91e-15	25.7909	DOWN
ZMYM3	0.927348	9.7321	9.37431	5.18e-16	8.17e-15	25.7583	UP
PCSK7	1.14547	9.31266	9.37383	5.2e-16	8.18e-15	25.7558	UP
CT69	-2.49097	4.19081	-9.37367	5.2e-16	8.18e-15	25.7549	DOWN
TMEM198	1.40594	7.52427	9.37357	5.21e-16	8.18e-15	25.7543	UP
ZSWIM8	1.17408	9.7332	9.37249	5.24e-16	8.22e-15	25.7485	UP
H3C7	-2.2285	7.41798	-9.37117	5.27e-16	8.27e-15	25.7413	DOWN
SLC25A34	1.54354	7.58747	9.37104	5.28e-16	8.27e-15	25.7407	UP
SPDYE2	1.84848	7.3581	9.37084	5.28e-16	8.28e-15	25.7396	UP
CPNE1	1.17059	10.4018	9.3703	5.3e-16	8.29e-15	25.7366	UP
ANKRD36	-1.68738	8.3572	-9.36877	5.34e-16	8.36e-15	25.7283	DOWN
DNM2	1.14631	9.222	9.3683	5.36e-16	8.37e-15	25.7258	UP
DYNLL2	0.987806	10.38	9.36742	5.38e-16	8.41e-15	25.721	UP
CCNC	-1.10646	12.4379	-9.36485	5.46e-16	8.52e-15	25.7071	DOWN
MRPS22	-0.765791	11.497	-9.36347	5.5e-16	8.58e-15	25.6996	DOWN
SDHD	-0.881299	12.687	-9.35797	5.67e-16	8.83e-15	25.6697	DOWN
RBM38	1.40872	10.434	9.35595	5.73e-16	8.92e-15	25.6588	UP
KCTD2	0.802223	9.08145	9.35558	5.74e-16	8.94e-15	25.6568	UP
TMA7	-0.769017	14.8384	-9.35029	5.91e-16	9.19e-15	25.6281	DOWN
TBCD	1.15808	9.1765	9.34943	5.94e-16	9.23e-15	25.6235	UP
MRPS30	-0.858152	11.1255	-9.34882	5.96e-16	9.25e-15	25.6202	DOWN
BOLA3	-1.24111	12.2701	-9.34783	5.99e-16	9.29e-15	25.6148	DOWN
B3GAT3	1.38521	8.40529	9.34719	6.01e-16	9.32e-15	25.6113	UP
RNF8	0.962255	9.38973	9.34577	6.06e-16	9.39e-15	25.6036	UP
CLCN6	1.58926	7.9546	9.34522	6.08e-16	9.41e-15	25.6006	UP
PFKL	1.14352	10.058	9.3427	6.16e-16	9.53e-15	25.587	UP
MED31	-1.28241	10.7188	-9.33376	6.47e-16	1e-14	25.5385	DOWN
PI4KB	0.736466	10.8132	9.33346	6.48e-16	1e-14	25.5369	UP
EIF5B	-1.51825	11.4703	-9.32523	6.78e-16	1.05e-14	25.4923	DOWN
ASH1L	-1.41	10.2667	-9.3242	6.82e-16	1.05e-14	25.4867	DOWN
NAT1	-0.826802	10.4228	-9.32102	6.94e-16	1.07e-14	25.4695	DOWN
KMT2E	-1.26963	10.8753	-9.32102	6.94e-16	1.07e-14	25.4695	DOWN
PHF12	1.18197	9.17129	9.31855	7.04e-16	1.08e-14	25.4561	UP
PCYT2	0.994586	8.71957	9.3096	7.39e-16	1.13e-14	25.4076	UP
RRN3P1	1.5259	9.11008	9.3062	7.53e-16	1.15e-14	25.3892	UP
ESD	-0.897612	13.0075	-9.30568	7.55e-16	1.16e-14	25.3863	DOWN
MAFK	1.04799	9.76394	9.30393	7.62e-16	1.17e-14	25.3769	UP
TRMT1L	-0.98287	10.0232	-9.30175	7.71e-16	1.18e-14	25.3651	DOWN
CDC5L	-0.751144	11.1759	-9.29884	7.84e-16	1.2e-14	25.3493	DOWN
PSMB4	-0.663717	14.0267	-9.29005	8.22e-16	1.26e-14	25.3017	DOWN
RAF1	0.67453	10.759	9.28994	8.23e-16	1.26e-14	25.3011	UP
MPI	0.960447	8.80647	9.28906	8.27e-16	1.26e-14	25.2963	UP
USH1G	1.60448	7.32455	9.28842	8.3e-16	1.26e-14	25.2929	UP
SNRPE	-0.801627	14.1574	-9.28786	8.32e-16	1.27e-14	25.2898	DOWN
DHX16	0.808256	10.2837	9.28281	8.55e-16	1.3e-14	25.2625	UP
RIDA	-1.40443	10.0171	-9.2737	8.99e-16	1.37e-14	25.2132	DOWN
ATP7A	-0.999823	8.43318	-9.27166	9.09e-16	1.38e-14	25.2021	DOWN
ATP13A2	1.32331	8.24218	9.26562	9.4e-16	1.43e-14	25.1694	UP
GCN1	0.855719	10.7693	9.26356	9.51e-16	1.44e-14	25.1582	UP
DIMT1	-0.841642	12.1487	-9.25937	9.73e-16	1.47e-14	25.1356	DOWN
NEK9	0.802548	10.8787	9.25588	9.91e-16	1.5e-14	25.1167	UP
AGL	-0.900325	11.0625	-9.25409	1e-15	1.51e-14	25.107	DOWN
PSMD6	-0.6915	12.7647	-9.25336	1.01e-15	1.52e-14	25.1031	DOWN
KATNBL1	-1.23352	10.1594	-9.25303	1.01e-15	1.52e-14	25.1012	DOWN
SVBP	-0.975632	9.90171	-9.2492	1.03e-15	1.55e-14	25.0805	DOWN
WDTC1	0.893968	9.79151	9.24799	1.03e-15	1.56e-14	25.074	UP
BNIP3L	-1.07642	12.1771	-9.24577	1.05e-15	1.58e-14	25.062	DOWN
LRRC57	-1.10821	9.58167	-9.24562	1.05e-15	1.58e-14	25.0612	DOWN
TIMELESS	1.13146	10.2959	9.24483	1.05e-15	1.58e-14	25.0569	UP
CAPNS1	1.12544	12.1448	9.24419	1.06e-15	1.59e-14	25.0534	UP
GPATCH11	-1.10351	9.87683	-9.24375	1.06e-15	1.59e-14	25.051	DOWN
GGA1	0.989038	12.1896	9.24235	1.07e-15	1.6e-14	25.0434	UP
HLA-F	1.00509	13.76	9.24048	1.08e-15	1.62e-14	25.0334	UP
RFPL3	1.0751	7.15224	9.23865	1.09e-15	1.63e-14	25.0234	UP
SLC7A4	2.19451	5.41392	9.23704	1.1e-15	1.65e-14	25.0148	UP
SMIM29	1.94256	7.65974	9.23496	1.11e-15	1.66e-14	25.0035	UP
COA5	-1.06403	11.3617	-9.23151	1.13e-15	1.69e-14	24.9848	DOWN
EWSR1	0.763857	12.0848	9.23146	1.13e-15	1.69e-14	24.9845	UP
CCDC91	-0.831765	10.311	-9.22309	1.19e-15	1.77e-14	24.9392	DOWN
ANXA7	-0.698453	12.0132	-9.22056	1.2e-15	1.79e-14	24.9256	DOWN
PTER	-1.55446	9.8826	-9.21435	1.24e-15	1.85e-14	24.892	DOWN
SLC38A5	2.17796	7.7275	9.2049	1.31e-15	1.95e-14	24.8409	UP
XPO7	0.900792	9.83674	9.20317	1.32e-15	1.97e-14	24.8315	UP
MFN2	0.90585	9.86457	9.19879	1.35e-15	2.02e-14	24.8078	UP
CCAR2	1.59513	8.56697	9.18711	1.44e-15	2.15e-14	24.7447	UP
ADAM21	2.17575	5.7028	9.18476	1.46e-15	2.17e-14	24.732	UP
PROSER3	1.1657	8.14424	9.18171	1.49e-15	2.21e-14	24.7155	UP
SLC46A1	1.14196	7.87914	9.17741	1.52e-15	2.26e-14	24.6922	UP
RORC	1.86282	6.46692	9.17666	1.53e-15	2.27e-14	24.6882	UP
SRM	1.19355	10.8136	9.17503	1.54e-15	2.28e-14	24.6794	UP
TBCEL	-0.727696	9.14108	-9.17499	1.54e-15	2.28e-14	24.6792	DOWN
SMU1	-0.824598	9.4283	-9.17496	1.54e-15	2.28e-14	24.679	DOWN
ASNSD1	-0.798161	11.4779	-9.17441	1.55e-15	2.29e-14	24.676	DOWN
LYSMD3	-0.901967	10.2369	-9.16984	1.59e-15	2.34e-14	24.6513	DOWN
C1QTNF1	1.26942	7.74128	9.16842	1.6e-15	2.36e-14	24.6436	UP
RPL39	-0.804223	15.9758	-9.16818	1.6e-15	2.36e-14	24.6424	DOWN
HDAC7	1.63335	9.12327	9.16791	1.6e-15	2.36e-14	24.6409	UP
WDR90	1.05572	8.8887	9.16613	1.62e-15	2.38e-14	24.6313	UP
LTB4R	2.14909	7.39963	9.16085	1.67e-15	2.45e-14	24.6028	UP
ATP8B1	1.44443	9.07609	9.15782	1.69e-15	2.49e-14	24.5864	UP
CCT6A	-0.813091	12.4479	-9.15773	1.69e-15	2.49e-14	24.5859	DOWN
BCL9	1.3482	7.60167	9.1564	1.71e-15	2.51e-14	24.5787	UP
ACAD8	0.912913	9.00252	9.15416	1.73e-15	2.54e-14	24.5666	UP
ATRX	0.864394	11.0398	9.15366	1.73e-15	2.54e-14	24.5639	UP
TERF1	-0.803425	10.2606	-9.15357	1.73e-15	2.54e-14	24.5634	DOWN
ZKSCAN2	1.58615	7.04346	9.15274	1.74e-15	2.55e-14	24.5589	UP
PPP1R12B	1.20867	8.39687	9.15188	1.75e-15	2.56e-14	24.5543	UP
CLUH	1.10829	9.81484	9.14907	1.78e-15	2.6e-14	24.5391	UP
BICRA	1.11405	8.46542	9.14736	1.79e-15	2.62e-14	24.5299	UP
NIP7	-1.05185	10.1757	-9.14388	1.83e-15	2.67e-14	24.5111	DOWN
RABGAP1	0.923094	10.9723	9.14141	1.85e-15	2.7e-14	24.4977	UP
CLOCK	0.942101	9.12042	9.139	1.88e-15	2.74e-14	24.4847	UP
AKT2	0.829897	10.3704	9.1371	1.9e-15	2.76e-14	24.4744	UP
ZFAND3	0.875686	9.79071	9.13674	1.9e-15	2.77e-14	24.4725	UP
EXOSC3	-0.97739	11.083	-9.13183	1.95e-15	2.84e-14	24.446	DOWN
BRAF	1.00961	9.18483	9.12765	2e-15	2.9e-14	24.4234	UP
ZNF444	0.89612	9.40798	9.12711	2e-15	2.91e-14	24.4205	UP
FAM118A	1.56409	8.26917	9.12625	2.01e-15	2.92e-14	24.4159	UP
RMDN3	0.677412	9.8676	9.12529	2.02e-15	2.93e-14	24.4107	UP
CIAO2A	-0.849133	13.2124	-9.12402	2.04e-15	2.95e-14	24.4038	DOWN
SLC25A51	0.896318	8.07209	9.1192	2.09e-15	3.03e-14	24.3778	UP
LIAS	-1.33344	8.26295	-9.11727	2.11e-15	3.06e-14	24.3674	DOWN
SPRTN	-0.845257	8.27608	-9.11565	2.13e-15	3.08e-14	24.3586	DOWN
MMP14	1.42248	9.48065	9.1145	2.15e-15	3.1e-14	24.3524	UP
ATG16L2	1.14655	8.50676	9.10816	2.22e-15	3.2e-14	24.3182	UP
HMGB2	-0.860219	14.4323	-9.10809	2.22e-15	3.2e-14	24.3178	DOWN
LOC101927513	1.25486	7.60354	9.10675	2.24e-15	3.23e-14	24.3106	UP
GPRC5D	2.11086	6.59835	9.10394	2.27e-15	3.27e-14	24.2954	UP
RAB6B	1.78975	7.12789	9.10263	2.29e-15	3.29e-14	24.2883	UP
MROH6	1.88683	7.0451	9.1008	2.31e-15	3.33e-14	24.2785	UP
SLC35A5	-0.861501	10.5205	-9.09917	2.33e-15	3.35e-14	24.2696	DOWN
MRPS33	-1.2261	12.0228	-9.09879	2.34e-15	3.36e-14	24.2676	DOWN
NME9	1.80389	6.02071	9.09775	2.35e-15	3.37e-14	24.262	UP
TFPI	-1.55506	9.48351	-9.09553	2.38e-15	3.41e-14	24.25	DOWN
RBM10	0.983611	10.4863	9.0955	2.38e-15	3.41e-14	24.2499	UP
RPL19	-0.733788	15.6424	-9.09368	2.4e-15	3.44e-14	24.2401	DOWN
C16orf70	0.758063	9.00362	9.08972	2.46e-15	3.51e-14	24.2187	UP
ZFYVE26	0.980385	9.34011	9.08861	2.47e-15	3.53e-14	24.2127	UP
POLDIP3	0.759507	10.6083	9.08837	2.47e-15	3.53e-14	24.2114	UP
STAT2	1.07514	12.0407	9.08759	2.49e-15	3.55e-14	24.2072	UP
XAGE-4	1.06279	8.44884	9.0821	2.56e-15	3.65e-14	24.1776	UP
DPAGT1	0.77508	9.97049	9.08209	2.56e-15	3.65e-14	24.1775	UP
PLCXD1	1.30381	9.75519	9.07559	2.65e-15	3.77e-14	24.1424	UP
SLC49A4	-0.928536	8.79319	-9.07375	2.68e-15	3.81e-14	24.1325	DOWN
RPAP1	1.06835	8.76676	9.07003	2.73e-15	3.88e-14	24.1125	UP
GATAD2A	1.17219	10.979	9.06926	2.75e-15	3.9e-14	24.1083	UP
ARF5	0.907076	10.8053	9.06854	2.76e-15	3.91e-14	24.1044	UP
XRCC4	-1.21682	8.61619	-9.06639	2.79e-15	3.95e-14	24.0928	DOWN
MAMDC4	2.43806	6.85636	9.06575	2.8e-15	3.96e-14	24.0894	UP
SPARCL1	-1.48329	11.7283	-9.06557	2.8e-15	3.96e-14	24.0884	DOWN
ATP23	-1.02902	9.85331	-9.06508	2.81e-15	3.97e-14	24.0858	DOWN
SMDT1	-0.885302	13.0545	-9.06461	2.82e-15	3.98e-14	24.0832	DOWN
NKTR	-1.52119	10.7528	-9.06452	2.82e-15	3.98e-14	24.0827	DOWN
LEMD2	1.50723	8.03081	9.0644	2.82e-15	3.98e-14	24.0821	UP
FAM135B	1.92507	6.66097	9.06421	2.82e-15	3.98e-14	24.0811	UP
CHCHD4	0.77466	10.0388	9.06333	2.84e-15	4e-14	24.0763	UP
UBQLN2	-0.909842	11.8149	-9.06319	2.84e-15	4e-14	24.0755	DOWN
GGN	-2.10851	4.25578	-9.06259	2.85e-15	4.01e-14	24.0723	DOWN
HIGD1A	-1.00694	13.1952	-9.05043	3.04e-15	4.27e-14	24.0067	DOWN
HNMT	-1.40707	11.6341	-9.05037	3.04e-15	4.27e-14	24.0064	DOWN
ABCC10	1.08219	9.46453	9.04601	3.12e-15	4.37e-14	23.9829	UP
VIPAS39	0.66806	9.79053	9.04144	3.2e-15	4.48e-14	23.9583	UP
HMG20B	0.949522	9.48304	9.03985	3.22e-15	4.52e-14	23.9497	UP
GGCX	-1.17051	10.3008	-9.03885	3.24e-15	4.54e-14	23.9443	DOWN
FBXW9	0.858027	8.32876	9.0382	3.25e-15	4.55e-14	23.9408	UP
SERINC1	-1.10878	11.7017	-9.03811	3.25e-15	4.55e-14	23.9403	DOWN
TAZ	0.96827	9.16119	9.03726	3.27e-15	4.57e-14	23.9358	UP
EFCAB7	-0.974532	8.6685	-9.0346	3.32e-15	4.63e-14	23.9214	DOWN
RNF185	0.796114	9.57371	9.033	3.35e-15	4.67e-14	23.9128	UP
LRP8	1.07239	9.0638	9.02925	3.42e-15	4.76e-14	23.8926	UP
PTCD2	-0.956023	9.25029	-9.02833	3.43e-15	4.78e-14	23.8876	DOWN
TBRG1	1.15114	10.4666	9.0281	3.44e-15	4.79e-14	23.8864	UP
SLC31A1	-1.6375	9.91356	-9.02615	3.47e-15	4.83e-14	23.8759	DOWN
KANSL3	0.91687	10.4311	9.02498	3.5e-15	4.86e-14	23.8696	UP
CCDC58	-1.89094	9.78029	-9.02335	3.53e-15	4.9e-14	23.8608	DOWN
MLST8	0.782302	9.12136	9.02329	3.53e-15	4.9e-14	23.8604	UP
WDSUB1	-1.01319	9.25436	-9.02204	3.55e-15	4.93e-14	23.8537	DOWN
COIL	-0.66213	10.261	-9.02178	3.56e-15	4.93e-14	23.8523	DOWN
GPR153	1.35607	8.80035	9.0202	3.59e-15	4.97e-14	23.8438	UP
EIF3M	-0.83608	13.6269	-9.01224	3.75e-15	5.18e-14	23.8009	DOWN
STX10	0.759529	9.85172	9.0113	3.77e-15	5.21e-14	23.7959	UP
MYH9	1.34143	10.534	9.01124	3.77e-15	5.21e-14	23.7955	UP
RHOT1	-0.81885	10.7654	-9.01036	3.79e-15	5.23e-14	23.7908	DOWN
TERF2IP	0.882441	11.3637	9.00938	3.81e-15	5.25e-14	23.7855	UP
MTRES1	-0.821118	9.78543	-9.00871	3.82e-15	5.27e-14	23.7819	DOWN
ATG2A	0.787771	9.33931	9.00686	3.86e-15	5.32e-14	23.7719	UP
PLIN5	1.73832	7.22268	9.00443	3.91e-15	5.38e-14	23.7588	UP
ATAT1	2.14675	7.30719	9.00358	3.93e-15	5.41e-14	23.7543	UP
CAMLG	-0.903734	11.6167	-9.00256	3.95e-15	5.43e-14	23.7488	DOWN
UBXN11	1.71121	7.8985	9.00175	3.97e-15	5.45e-14	23.7444	UP
C6orf120	-1.00258	10.3349	-9.00159	3.97e-15	5.45e-14	23.7436	DOWN
CNTROB	1.41131	8.54945	9.00044	4e-15	5.48e-14	23.7374	UP
AREL1	1.04489	9.6203	8.99937	4.02e-15	5.51e-14	23.7316	UP
ALS2	0.706924	8.75695	8.9981	4.05e-15	5.54e-14	23.7248	UP
FAM230B	2.10513	5.70157	8.99608	4.09e-15	5.6e-14	23.7139	UP
ZNF414	2.19134	6.12673	8.99257	4.17e-15	5.7e-14	23.6949	UP
ANKRD36B	-2.0682	9.34334	-8.99245	4.17e-15	5.7e-14	23.6943	DOWN
C1orf35	0.784752	9.10082	8.99191	4.19e-15	5.71e-14	23.6914	UP
TOLLIP	0.783867	8.77134	8.99183	4.19e-15	5.71e-14	23.691	UP
USP21	1.00896	9.3485	8.99175	4.19e-15	5.71e-14	23.6906	UP
YJEFN3	2.1494	5.29596	8.99107	4.2e-15	5.73e-14	23.6869	UP
PGF	1.00821	10.3485	8.98901	4.25e-15	5.79e-14	23.6758	UP
DMPK	1.14233	8.00346	8.9844	4.36e-15	5.94e-14	23.651	UP
BTBD2	1.51195	7.91822	8.9825	4.41e-15	5.99e-14	23.6408	UP
TUBGCP2	0.938538	9.99119	8.98155	4.43e-15	6.02e-14	23.6357	UP
SDR39U1	0.729414	10.6578	8.97934	4.48e-15	6.09e-14	23.6237	UP
CCDC90B	-0.823239	11.523	-8.97784	4.52e-15	6.13e-14	23.6156	DOWN
UBB	-0.671419	15.5149	-8.97085	4.69e-15	6.37e-14	23.578	DOWN
FPGS	0.844731	9.79615	8.96996	4.72e-15	6.39e-14	23.5733	UP
RSAD1	0.841104	9.48705	8.96986	4.72e-15	6.39e-14	23.5727	UP
OR51M1	2.01913	5.20024	8.96913	4.74e-15	6.41e-14	23.5688	UP
PDCD7	-0.849477	10.4112	-8.96895	4.74e-15	6.42e-14	23.5678	DOWN
MIA3	0.936311	9.67443	8.96663	4.8e-15	6.49e-14	23.5553	UP
SCAF11	-0.882129	11.8348	-8.96617	4.81e-15	6.51e-14	23.5528	DOWN
BAZ1B	1.08253	10.2544	8.96153	4.94e-15	6.67e-14	23.5279	UP
FAM160A1	1.38895	7.55763	8.95892	5.01e-15	6.76e-14	23.5138	UP
CHPF	1.32842	8.00893	8.95846	5.02e-15	6.77e-14	23.5114	UP
EED	-0.946486	12.4021	-8.95321	5.17e-15	6.96e-14	23.4831	DOWN
GARS1-DT	1.05902	8.5494	8.95173	5.21e-15	7.01e-14	23.4751	UP
DENND4B	1.08263	11.1351	8.9516	5.21e-15	7.01e-14	23.4745	UP
ZSCAN9	1.6158	7.82284	8.95148	5.22e-15	7.01e-14	23.4738	UP
ARV1	-0.89123	10.6557	-8.94932	5.28e-15	7.09e-14	23.4622	DOWN
ZSCAN30	1.00296	8.69644	8.94884	5.29e-15	7.11e-14	23.4596	UP
MAN2B1	1.06548	11.7669	8.94649	5.36e-15	7.19e-14	23.4469	UP
ELAVL1	1.04757	12.1542	8.94198	5.49e-15	7.37e-14	23.4227	UP
TIRAP	1.0918	7.67448	8.93965	5.56e-15	7.46e-14	23.4102	UP
BLZF1	-1.30786	8.53578	-8.9395	5.57e-15	7.46e-14	23.4093	DOWN
SUGP1	1.14384	8.22606	8.93771	5.62e-15	7.52e-14	23.3997	UP
SPATA32	1.80549	8.24654	8.93564	5.68e-15	7.6e-14	23.3886	UP
ADH5	-0.862169	12.2014	-8.93555	5.69e-15	7.6e-14	23.3881	DOWN
DDA1	0.973937	9.05552	8.93548	5.69e-15	7.6e-14	23.3877	UP
PCBP4	1.21704	8.1767	8.93525	5.7e-15	7.61e-14	23.3865	UP
SLC30A9	-0.670511	10.9451	-8.93066	5.84e-15	7.79e-14	23.3618	DOWN
JTB	-0.812795	14.285	-8.92763	5.94e-15	7.92e-14	23.3455	DOWN
CNOT2	-0.815975	11.7189	-8.92608	5.99e-15	7.98e-14	23.3372	DOWN
NECAP1	0.667061	9.51403	8.92346	6.07e-15	8.09e-14	23.3231	UP
ERC1	0.932194	9.22182	8.9225	6.11e-15	8.12e-14	23.3179	UP
TPCN2	1.2274	8.85491	8.92221	6.11e-15	8.13e-14	23.3164	UP
NELFB	0.758672	10.5292	8.92042	6.17e-15	8.21e-14	23.3068	UP
LYG1	2.33329	6.31852	8.91981	6.2e-15	8.23e-14	23.3034	UP
RCCD1	1.04599	10.4768	8.91707	6.29e-15	8.35e-14	23.2887	UP
TCOF1	0.962326	9.37036	8.9162	6.32e-15	8.38e-14	23.284	UP
ANP32A-IT1	1.88707	6.27947	8.91558	6.34e-15	8.4e-14	23.2807	UP
SEC11A	-0.654901	13.2344	-8.91528	6.35e-15	8.41e-14	23.2791	DOWN
RHEB	-0.83121	12.6828	-8.9145	6.38e-15	8.44e-14	23.2749	DOWN
PSME3IP1	0.805146	10.652	8.91158	6.48e-15	8.57e-14	23.2592	UP
CYRIB	-0.816775	12.641	-8.91156	6.48e-15	8.57e-14	23.2591	DOWN
UBE3B	0.764214	9.33511	8.90636	6.66e-15	8.81e-14	23.2312	UP
WHRN	2.69901	6.36907	8.90299	6.79e-15	8.96e-14	23.213	UP
LRRC52	2.40901	6.56464	8.89939	6.92e-15	9.13e-14	23.1937	UP
KAZALD1	1.81762	5.65886	8.89809	6.97e-15	9.19e-14	23.1867	UP
IRF6	1.8946	6.6364	8.89513	7.08e-15	9.33e-14	23.1708	UP
MBD3	0.904496	10.5002	8.89373	7.14e-15	9.4e-14	23.1633	UP
RPS27	-0.773888	15.9498	-8.89356	7.15e-15	9.4e-14	23.1624	DOWN
PDLIM7	1.58191	7.9723	8.89327	7.16e-15	9.41e-14	23.1608	UP
RETREG3	0.690003	11.192	8.8932	7.16e-15	9.41e-14	23.1604	UP
IL2RG	1.45146	11.8366	8.89258	7.18e-15	9.43e-14	23.1571	UP
RHBDD2	0.870786	9.55417	8.88934	7.31e-15	9.6e-14	23.1397	UP
BPIFA3	1.78059	6.91971	8.88742	7.39e-15	9.69e-14	23.1294	UP
EHMT2	1.49822	8.89025	8.88395	7.53e-15	9.87e-14	23.1107	UP
RPL26L1	-1.41842	11.8625	-8.88124	7.64e-15	1e-13	23.0962	DOWN
MFSD4B	1.54654	7.35882	8.87801	7.77e-15	1.02e-13	23.0788	UP
GTF3A	-0.941545	14.2613	-8.87447	7.93e-15	1.04e-13	23.0598	DOWN
RNPEP	0.984758	10.441	8.8723	8.02e-15	1.05e-13	23.0481	UP
COPB1	-0.831106	13.8408	-8.87042	8.1e-15	1.06e-13	23.0381	DOWN
PIP5K1A	0.807053	10.0245	8.87018	8.11e-15	1.06e-13	23.0367	UP
ATP6AP1	1.02988	11.3991	8.86854	8.18e-15	1.07e-13	23.028	UP
SEZ6	2.15969	6.11224	8.86836	8.19e-15	1.07e-13	23.027	UP
FARSA	0.792214	10.0463	8.86823	8.2e-15	1.07e-13	23.0263	UP
MKRN1	1.02988	11.2528	8.86819	8.2e-15	1.07e-13	23.026	UP
SHARPIN	1.66419	8.04726	8.86691	8.26e-15	1.07e-13	23.0192	UP
ALMS1	0.938331	9.0038	8.86594	8.3e-15	1.08e-13	23.014	UP
ARL1	-0.831592	10.9488	-8.86398	8.39e-15	1.09e-13	23.0034	DOWN
GAU1	2.00512	6.3534	8.86179	8.49e-15	1.1e-13	22.9917	UP
ETFA	-0.847972	12.4358	-8.85993	8.58e-15	1.11e-13	22.9817	DOWN
KBTBD3	-1.28373	8.48793	-8.8563	8.75e-15	1.13e-13	22.9622	DOWN
GRM6	1.39106	6.54997	8.85629	8.75e-15	1.13e-13	22.9621	UP
EIF3E	-0.731972	14.6363	-8.85453	8.83e-15	1.14e-13	22.9527	DOWN
GALNT7	-0.938964	10.7477	-8.85367	8.87e-15	1.15e-13	22.9481	DOWN
NLN	1.1562	10.4016	8.85279	8.92e-15	1.15e-13	22.9434	UP
IQSEC2	1.28424	7.06843	8.84946	9.08e-15	1.17e-13	22.9255	UP
ARSA	1.52314	7.83087	8.84901	9.1e-15	1.18e-13	22.9231	UP
TRIM56	1.08099	9.50137	8.84813	9.14e-15	1.18e-13	22.9184	UP
LOC101928516	2.19983	5.54309	8.84754	9.17e-15	1.18e-13	22.9152	UP
WDR61	-0.903194	12.2663	-8.84335	9.38e-15	1.21e-13	22.8927	DOWN
FICD	0.70329	8.49424	8.84201	9.45e-15	1.22e-13	22.8855	UP
ZNF548	0.788348	9.943	8.83879	9.62e-15	1.24e-13	22.8683	UP
KDM6A	0.906705	8.93065	8.83864	9.63e-15	1.24e-13	22.8674	UP
NDUFAF4	-0.895707	11.1238	-8.8372	9.7e-15	1.25e-13	22.8597	DOWN
STX5	1.28466	8.02469	8.83697	9.72e-15	1.25e-13	22.8585	UP
TMEM63B	1.18988	7.97231	8.83252	9.95e-15	1.28e-13	22.8346	UP
TUBB	1.05035	13.737	8.82991	1.01e-14	1.29e-13	22.8206	UP
FKBP1A	0.998226	12.4811	8.82842	1.02e-14	1.3e-13	22.8126	UP
CA2	-1.79204	8.60614	-8.82778	1.02e-14	1.31e-13	22.8092	DOWN
TAGLN3	2.21453	5.97635	8.82545	1.03e-14	1.32e-13	22.7967	UP
DBI	-0.731298	14.2609	-8.82446	1.04e-14	1.33e-13	22.7913	DOWN
FANCC	0.767479	8.32919	8.82364	1.04e-14	1.33e-13	22.787	UP
TDRD3	-0.954549	8.83504	-8.82082	1.06e-14	1.35e-13	22.7718	DOWN
UBTF	0.849873	9.87908	8.81724	1.08e-14	1.38e-13	22.7526	UP
GTF3C1	0.840419	10.0665	8.817	1.08e-14	1.38e-13	22.7513	UP
PAQR6	1.97617	7.17844	8.81108	1.12e-14	1.42e-13	22.7196	UP
TECPR1	1.26621	10.1238	8.81089	1.12e-14	1.43e-13	22.7185	UP
NPSR1-AS1	2.30375	5.48706	8.8094	1.13e-14	1.44e-13	22.7106	UP
ARL6IP5	-0.890356	13.6004	-8.80412	1.16e-14	1.48e-13	22.6822	DOWN
PLK3	1.14237	8.507	8.8039	1.16e-14	1.48e-13	22.6811	UP
ZNF92	-1.08435	10.4572	-8.80315	1.17e-14	1.48e-13	22.6771	DOWN
LOC283045	0.858053	8.07922	8.80066	1.18e-14	1.5e-13	22.6637	UP
UBN2	1.12206	8.72411	8.8004	1.18e-14	1.5e-13	22.6623	UP
CNIH1	-0.981619	12.8549	-8.7962	1.21e-14	1.54e-13	22.6398	DOWN
CES2	0.777999	9.54648	8.79505	1.22e-14	1.55e-13	22.6336	UP
FLOT1	0.845227	11.5785	8.7946	1.22e-14	1.55e-13	22.6312	UP
ARL4A	-1.70795	8.95069	-8.79344	1.23e-14	1.56e-13	22.625	DOWN
NUP214	0.835086	9.37629	8.79193	1.24e-14	1.57e-13	22.6169	UP
HSF1	1.1519	9.14166	8.78933	1.26e-14	1.59e-13	22.6029	UP
YTHDF2	-0.830832	12.2379	-8.78816	1.27e-14	1.6e-13	22.5967	DOWN
MOSPD3	0.901633	8.49583	8.7852	1.29e-14	1.62e-13	22.5808	UP
TTLL10	1.22443	7.49634	8.78177	1.31e-14	1.65e-13	22.5624	UP
ZFP90	-1.26029	9.75344	-8.7814	1.31e-14	1.66e-13	22.5604	DOWN
SLC25A32	-0.692979	11.2892	-8.78087	1.32e-14	1.66e-13	22.5576	DOWN
SFT2D1	-0.948508	12.846	-8.77954	1.33e-14	1.67e-13	22.5505	DOWN
CD40	1.03047	11.2268	8.77841	1.33e-14	1.68e-13	22.5444	UP
GET1	-0.973606	11.019	-8.7771	1.34e-14	1.69e-13	22.5374	DOWN
LMF1	1.50907	8.17797	8.77633	1.35e-14	1.7e-13	22.5333	UP
RIF1	-0.878796	9.39157	-8.77588	1.35e-14	1.7e-13	22.5309	DOWN
GOLGA2P5	1.24116	8.63101	8.77535	1.36e-14	1.7e-13	22.528	UP
ADAMTS4	1.86695	6.2096	8.7745	1.36e-14	1.71e-13	22.5235	UP
FBXO46	0.923861	9.88585	8.77423	1.37e-14	1.71e-13	22.522	UP
POLRMT	1.14874	9.47446	8.77027	1.39e-14	1.75e-13	22.5008	UP
C11orf58	-0.653044	13.2277	-8.76591	1.43e-14	1.79e-13	22.4774	DOWN
CCNL2	1.05366	11.4314	8.76519	1.43e-14	1.79e-13	22.4736	UP
ATG14	0.732042	9.34019	8.76404	1.44e-14	1.8e-13	22.4674	UP
ZBTB9	0.827663	8.62299	8.76299	1.45e-14	1.81e-13	22.4618	UP
CCDC134	1.28262	8.27449	8.76244	1.46e-14	1.82e-13	22.4589	UP
AGPAT3	1.27414	10.0659	8.76129	1.46e-14	1.83e-13	22.4527	UP
ATG16L1	1.33978	7.56938	8.76034	1.47e-14	1.84e-13	22.4476	UP
EEF1AKMT3	1.21109	8.456	8.75932	1.48e-14	1.85e-13	22.4421	UP
RB1CC1	-0.707351	10.2669	-8.75799	1.49e-14	1.86e-13	22.435	DOWN
TP53RK	-0.751003	10.041	-8.75264	1.53e-14	1.91e-13	22.4064	DOWN
TFAP2E	1.14305	7.58956	8.75263	1.53e-14	1.91e-13	22.4063	UP
C1orf159	1.80885	6.74982	8.75184	1.54e-14	1.92e-13	22.4021	UP
MFSD10	1.18106	9.38024	8.75055	1.55e-14	1.93e-13	22.3952	UP
FOXP4	1.13959	8.60401	8.74951	1.56e-14	1.94e-13	22.3896	UP
SRFBP1	-0.766534	8.45449	-8.74871	1.57e-14	1.94e-13	22.3853	DOWN
TTC30B	-1.30597	7.13299	-8.74353	1.61e-14	2e-13	22.3576	DOWN
ALS2CL	1.09943	8.55647	8.74251	1.62e-14	2.01e-13	22.3521	UP
PWWP3A	1.27084	8.67767	8.74048	1.64e-14	2.03e-13	22.3413	UP
APEX2	1.04695	9.30932	8.74003	1.64e-14	2.03e-13	22.3388	UP
NPTN	-0.714219	12.7191	-8.7383	1.66e-14	2.05e-13	22.3296	DOWN
CLIC2	-1.28163	10.1483	-8.73629	1.68e-14	2.07e-13	22.3188	DOWN
TXNDC17	-0.951524	12.5015	-8.73521	1.69e-14	2.08e-13	22.3131	DOWN
NCDN	1.2776	7.79904	8.73434	1.69e-14	2.09e-13	22.3084	UP
PCED1A	1.07802	9.02993	8.73367	1.7e-14	2.1e-13	22.3048	UP
FITM2	0.722181	8.46629	8.73352	1.7e-14	2.1e-13	22.304	UP
LRR1	-1.01943	11.5676	-8.73251	1.71e-14	2.11e-13	22.2986	DOWN
CTNNB1	-0.893924	11.8981	-8.73125	1.72e-14	2.12e-13	22.2918	DOWN
MYO9B	0.929948	9.71783	8.73073	1.73e-14	2.13e-13	22.289	UP
THAP6	-0.709044	8.74503	-8.72978	1.74e-14	2.14e-13	22.284	DOWN
PTRHD1	-1.10911	12.0269	-8.72598	1.77e-14	2.18e-13	22.2636	DOWN
RBM7	-0.975598	11.0762	-8.72314	1.8e-14	2.21e-13	22.2485	DOWN
KRT1	1.95183	5.42938	8.72258	1.81e-14	2.22e-13	22.2455	UP
PLEKHG2	0.974747	8.96818	8.72221	1.81e-14	2.22e-13	22.2434	UP
COG6	-0.890412	10.1773	-8.72193	1.81e-14	2.22e-13	22.242	DOWN
RTN4	-0.695615	13.4372	-8.72138	1.82e-14	2.23e-13	22.239	DOWN
KIF3C	1.80547	7.47608	8.72081	1.82e-14	2.23e-13	22.236	UP
PPP2R1B	0.982881	9.92251	8.71753	1.86e-14	2.27e-13	22.2184	UP
PNPLA8	-0.949383	11.5093	-8.71747	1.86e-14	2.27e-13	22.2181	DOWN
ATP5MF	1.80059	4.73592	8.71568	1.87e-14	2.29e-13	22.2085	UP
NIPSNAP3A	-1.20168	10.2651	-8.71549	1.88e-14	2.29e-13	22.2075	DOWN
NT5C	1.47095	7.39204	8.71424	1.89e-14	2.31e-13	22.2008	UP
TALDO1	-0.743897	13.3901	-8.71302	1.9e-14	2.32e-13	22.1943	DOWN
XPO1	-0.709488	13.6476	-8.71294	1.9e-14	2.32e-13	22.1938	DOWN
ADAD1	1.19079	7.03691	8.71213	1.91e-14	2.33e-13	22.1895	UP
GAA	1.19181	9.542	8.70907	1.94e-14	2.37e-13	22.1732	UP
ILF3	0.783155	11.715	8.70724	1.96e-14	2.39e-13	22.1634	UP
BUB3	-0.906039	13.1668	-8.70636	1.97e-14	2.4e-13	22.1586	DOWN
DENND5A	1.1127	9.93816	8.70449	1.99e-14	2.42e-13	22.1486	UP
GTPBP6	0.92754	9.82961	8.70398	2e-14	2.43e-13	22.1459	UP
SLC35E1	0.986115	10.7228	8.69938	2.05e-14	2.49e-13	22.1213	UP
ASXL3	1.96779	6.35226	8.69904	2.05e-14	2.49e-13	22.1195	UP
PPP1R37	1.71641	6.38638	8.69398	2.11e-14	2.56e-13	22.0924	UP
NCL	0.921677	13.4342	8.69355	2.11e-14	2.56e-13	22.0901	UP
LEMD3	-0.748142	10.8089	-8.69352	2.11e-14	2.56e-13	22.09	DOWN
DCTN1	1.17351	9.80883	8.69272	2.12e-14	2.57e-13	22.0857	UP
ANHX	1.72964	7.60257	8.69083	2.14e-14	2.59e-13	22.0756	UP
ERF	1.16256	7.97253	8.69021	2.15e-14	2.6e-13	22.0723	UP
ZMIZ2	1.18612	11.489	8.68973	2.16e-14	2.61e-13	22.0697	UP
ACTN2	1.69851	6.73584	8.68942	2.16e-14	2.61e-13	22.068	UP
ENTR1	0.889543	9.57423	8.68279	2.24e-14	2.7e-13	22.0326	UP
SKP1	-0.725072	14.5992	-8.67874	2.29e-14	2.76e-13	22.0109	DOWN
FASTKD3	-1.01848	10.8481	-8.67748	2.3e-14	2.78e-13	22.0042	DOWN
THNSL2	1.26322	6.9845	8.67109	2.39e-14	2.87e-13	21.9701	UP
PLK1	1.16	9.10573	8.66629	2.45e-14	2.94e-13	21.9444	UP
RPF1	-0.860458	12.4279	-8.66616	2.45e-14	2.94e-13	21.9437	DOWN
ADIRF-AS1	1.29165	7.18517	8.66357	2.48e-14	2.98e-13	21.9299	UP
MISP	1.79129	6.06219	8.66178	2.51e-14	3.01e-13	21.9203	UP
VIT	1.90736	6.60005	8.6617	2.51e-14	3.01e-13	21.9199	UP
EIF2A	-0.779749	12.4848	-8.6604	2.53e-14	3.03e-13	21.9129	DOWN
GSX2	1.90308	6.30523	8.65956	2.54e-14	3.04e-13	21.9085	UP
PIEZO1	2.15847	9.11065	8.65854	2.55e-14	3.06e-13	21.903	UP
BAIAP2	1.01185	7.16272	8.65852	2.55e-14	3.06e-13	21.9029	UP
ZNF839	1.20258	8.00837	8.65693	2.58e-14	3.08e-13	21.8944	UP
BTN2A2	1.15638	10.2765	8.65613	2.59e-14	3.09e-13	21.8901	UP
RAC1	-0.784043	13.5299	-8.65423	2.61e-14	3.12e-13	21.8799	DOWN
C2orf49-DT	1.65057	7.83503	8.6541	2.62e-14	3.12e-13	21.8793	UP
RAB26	1.08039	6.90129	8.65409	2.62e-14	3.12e-13	21.8792	UP
VPS13A	1.19213	9.03082	8.65311	2.63e-14	3.13e-13	21.874	UP
RGL2	0.965973	10.1017	8.65056	2.67e-14	3.18e-13	21.8604	UP
CLPTM1	1.35101	9.50388	8.6496	2.68e-14	3.19e-13	21.8552	UP
FDX1	-0.933151	11.7488	-8.64779	2.71e-14	3.22e-13	21.8456	DOWN
ATP10B	1.90318	6.38837	8.64656	2.72e-14	3.24e-13	21.839	UP
RAB1B	0.940867	10.6294	8.64224	2.79e-14	3.31e-13	21.8159	UP
RAD17	-0.889315	10.9725	-8.6414	2.8e-14	3.33e-13	21.8115	DOWN
POLR2I	-0.841049	11.9152	-8.64139	2.8e-14	3.33e-13	21.8114	DOWN
SLC6A16	1.83832	8.17946	8.63929	2.83e-14	3.36e-13	21.8002	UP
DNAH1	2.54665	6.71682	8.63807	2.85e-14	3.38e-13	21.7937	UP
IRGQ	0.928527	9.33301	8.63738	2.86e-14	3.39e-13	21.79	UP
ACOT13	-0.903286	11.1316	-8.63733	2.86e-14	3.39e-13	21.7897	DOWN
CDKN2AIP	-0.881256	9.64406	-8.63564	2.89e-14	3.42e-13	21.7807	DOWN
ASB1	1.02618	9.01582	8.63548	2.89e-14	3.42e-13	21.7798	UP
KDM6B	1.0558	9.53834	8.63467	2.9e-14	3.43e-13	21.7755	UP
UMAD1	-0.96823	9.60389	-8.633	2.93e-14	3.46e-13	21.7666	DOWN
WDR24	1.44356	7.71697	8.63082	2.97e-14	3.5e-13	21.755	UP
SFI1	0.978659	9.5538	8.63071	2.97e-14	3.5e-13	21.7544	UP
EFCAB11	-0.951545	9.82339	-8.63068	2.97e-14	3.5e-13	21.7542	DOWN
SHKBP1	1.60254	9.23095	8.62841	3e-14	3.54e-13	21.7421	UP
PDHX	-0.821938	10.752	-8.62643	3.04e-14	3.58e-13	21.7315	DOWN
HELZ	0.984058	9.79427	8.62601	3.04e-14	3.58e-13	21.7293	UP
CMTM5	2.09851	5.73944	8.62576	3.05e-14	3.59e-13	21.728	UP
SPECC1L	1.14313	9.41273	8.62497	3.06e-14	3.6e-13	21.7237	UP
VAMP8	-0.904883	13.2919	-8.6206	3.13e-14	3.68e-13	21.7004	DOWN
RPUSD1	0.767775	8.46703	8.61819	3.18e-14	3.73e-13	21.6875	UP
PIP4P1	0.760242	9.86918	8.61741	3.19e-14	3.74e-13	21.6833	UP
BUD31	-0.910195	12.087	-8.61539	3.22e-14	3.78e-13	21.6726	DOWN
NSMCE1-DT	1.94479	6.47363	8.61457	3.24e-14	3.8e-13	21.6682	UP
LOC100288570	1.98082	5.43902	8.61295	3.27e-14	3.83e-13	21.6596	UP
CENPN	-1.41878	10.3789	-8.61135	3.29e-14	3.86e-13	21.651	DOWN
WDR45B	0.647462	10.8536	8.61107	3.3e-14	3.86e-13	21.6495	UP
SPAAR	1.35271	7.45471	8.608	3.35e-14	3.93e-13	21.6331	UP
TMEFF2	-1.35453	9.6488	-8.60597	3.39e-14	3.97e-13	21.6223	DOWN
SMIM20	-1.07796	11.3802	-8.60485	3.41e-14	3.99e-13	21.6163	DOWN
LRRC40	-0.914254	11.6255	-8.60367	3.43e-14	4.01e-13	21.61	DOWN
HTT	0.992441	9.20087	8.60189	3.47e-14	4.05e-13	21.6006	UP
CHCHD7	-0.937209	11.864	-8.60126	3.48e-14	4.06e-13	21.5972	DOWN
PRELID3B	-0.864549	11.4202	-8.59868	3.53e-14	4.11e-13	21.5834	DOWN
PIRT	1.85569	5.28439	8.59866	3.53e-14	4.11e-13	21.5833	UP
BTG2	1.23592	11.7448	8.5982	3.54e-14	4.12e-13	21.5809	UP
FBXO28	-0.811607	10.6767	-8.59536	3.59e-14	4.18e-13	21.5657	DOWN
KLHL17	1.75127	6.82919	8.59514	3.6e-14	4.18e-13	21.5646	UP
WARS2-AS1	1.09261	7.46018	8.59459	3.61e-14	4.19e-13	21.5616	UP
NASP	1.07644	11.9201	8.59194	3.66e-14	4.25e-13	21.5475	UP
RPL30	-0.725352	15.8702	-8.59177	3.66e-14	4.25e-13	21.5466	DOWN
RELL2	0.971042	8.88821	8.58856	3.73e-14	4.32e-13	21.5295	UP
PPP3R1	-0.819408	9.0806	-8.58722	3.75e-14	4.35e-13	21.5223	DOWN
PSMA5	-0.945718	12.8832	-8.58527	3.79e-14	4.39e-13	21.5119	DOWN
TUBB3	0.946811	11.5775	8.58524	3.79e-14	4.39e-13	21.5118	UP
MVD	2.04437	6.12789	8.58362	3.83e-14	4.43e-13	21.5031	UP
PSMD13	0.786074	11.4505	8.58247	3.85e-14	4.45e-13	21.497	UP
RPL27	-0.673811	15.5977	-8.5798	3.91e-14	4.51e-13	21.4828	DOWN
CHST10	1.0784	8.81898	8.57901	3.92e-14	4.53e-13	21.4785	UP
STIP1	0.965955	10.4266	8.57701	3.97e-14	4.57e-13	21.4679	UP
VPS52	0.736275	10.7092	8.57667	3.97e-14	4.58e-13	21.466	UP
L3MBTL2	0.878413	10.1406	8.57608	3.99e-14	4.59e-13	21.4629	UP
WDR83	0.942123	8.1568	8.57219	4.07e-14	4.69e-13	21.4422	UP
ZNF37A	-1.2833	8.42969	-8.57178	4.08e-14	4.69e-13	21.44	DOWN
PLAGL2	0.734848	9.28906	8.57153	4.08e-14	4.7e-13	21.4387	UP
GPS1	0.8491	9.09295	8.57144	4.09e-14	4.7e-13	21.4382	UP
B3GNT6	-2.18916	5.53134	-8.56832	4.16e-14	4.77e-13	21.4216	DOWN
STMP1	-0.646373	11.9552	-8.56273	4.28e-14	4.92e-13	21.3918	DOWN
SIPA1L3	1.27968	8.6792	8.55297	4.51e-14	5.18e-13	21.3397	UP
ARPC3	-0.79199	14.134	-8.55109	4.56e-14	5.23e-13	21.3297	DOWN
DERL1	-0.603426	11.975	-8.54968	4.59e-14	5.27e-13	21.3223	DOWN
GINM1	-0.971887	10.5121	-8.54844	4.63e-14	5.3e-13	21.3156	DOWN
STARD3	0.72287	8.58132	8.54833	4.63e-14	5.3e-13	21.315	UP
DEPDC5	1.82141	7.71325	8.54812	4.63e-14	5.3e-13	21.3139	UP
INTS9	0.885473	9.66294	8.54684	4.67e-14	5.34e-13	21.3071	UP
DCAF4	0.781133	9.02025	8.54597	4.69e-14	5.36e-13	21.3025	UP
C1QTNF6	1.74328	5.91457	8.54216	4.78e-14	5.46e-13	21.2822	UP
ITGA10	1.01417	7.60691	8.54208	4.79e-14	5.46e-13	21.2817	UP
RSPRY1	-0.782631	10.7916	-8.54022	4.84e-14	5.52e-13	21.2718	DOWN
PIM3	0.859725	11.0645	8.53874	4.87e-14	5.56e-13	21.264	UP
LOC100507477	2.2576	5.43578	8.53807	4.89e-14	5.57e-13	21.2604	UP
DXO	0.958306	9.19596	8.53679	4.93e-14	5.61e-13	21.2536	UP
IKBKE	1.04725	9.81087	8.53233	5.05e-14	5.74e-13	21.2298	UP
TAB1	1.5669	7.08086	8.5318	5.06e-14	5.76e-13	21.227	UP
CMC2	-0.899571	11.6597	-8.53074	5.09e-14	5.79e-13	21.2214	DOWN
TBC1D20	0.661029	9.11602	8.53019	5.1e-14	5.8e-13	21.2184	UP
DHX35	1.75953	7.04758	8.52782	5.17e-14	5.87e-13	21.2058	UP
CD3E	1.68251	8.66813	8.52639	5.21e-14	5.91e-13	21.1982	UP
RCHY1	-0.887467	10.8473	-8.52385	5.28e-14	5.99e-13	21.1847	DOWN
UTP23	-0.769451	10.6332	-8.52244	5.32e-14	6.03e-13	21.1772	DOWN
CCDC177	2.04971	5.29802	8.52233	5.32e-14	6.03e-13	21.1766	UP
NFKBID	1.50149	9.75929	8.52069	5.37e-14	6.08e-13	21.1678	UP
RBFA	1.30172	8.80682	8.52058	5.37e-14	6.08e-13	21.1673	UP
EXOC3L2	0.918837	8.66624	8.51962	5.4e-14	6.11e-13	21.1622	UP
GSTA1	0.738876	8.03922	8.51791	5.45e-14	6.17e-13	21.1531	UP
MRPL30	-0.736898	11.3057	-8.51767	5.46e-14	6.17e-13	21.1518	DOWN
DUS4L	-0.851132	9.06521	-8.51749	5.46e-14	6.17e-13	21.1508	DOWN
EGFR	1.58793	7.50585	8.51656	5.49e-14	6.2e-13	21.1459	UP
PSMG4	-1.03208	11.1657	-8.51652	5.49e-14	6.2e-13	21.1456	DOWN
PLCB2	1.54047	7.99275	8.51234	5.62e-14	6.34e-13	21.1234	UP
GTSE1	0.835668	10.6741	8.51116	5.65e-14	6.37e-13	21.1171	UP
SUPT5H	0.652457	10.3211	8.51094	5.66e-14	6.38e-13	21.116	UP
VPS9D1	1.55044	7.35185	8.50841	5.74e-14	6.46e-13	21.1025	UP
SGCE	-1.37614	9.60625	-8.49726	6.09e-14	6.86e-13	21.0432	DOWN
OR5P2	2.07454	5.53144	8.49564	6.15e-14	6.91e-13	21.0346	UP
ATP6V0D2	1.48064	7.8204	8.49505	6.17e-14	6.93e-13	21.0314	UP
SLC6A13	1.66724	6.6823	8.49276	6.24e-14	7.01e-13	21.0192	UP
DYNLL1	-0.67419	14.247	-8.49255	6.25e-14	7.02e-13	21.0181	DOWN
PHLDA3	1.60821	7.84502	8.4894	6.36e-14	7.13e-13	21.0014	UP
SCFD1	-0.592624	10.8302	-8.48939	6.36e-14	7.13e-13	21.0013	DOWN
HDAC8	-1.20056	8.1767	-8.4831	6.58e-14	7.37e-13	20.9679	DOWN
MRPL10	-0.635203	10.8361	-8.47894	6.73e-14	7.53e-13	20.9458	DOWN
MRPL57	-0.848529	13.1976	-8.47614	6.83e-14	7.64e-13	20.9309	DOWN
EML2	0.853369	8.85024	8.47545	6.85e-14	7.67e-13	20.9272	UP
MYO19	0.881055	9.51615	8.47379	6.91e-14	7.73e-13	20.9184	UP
DNAAF2	-1.35717	9.74227	-8.47359	6.92e-14	7.73e-13	20.9173	DOWN
MRPL50	-0.991911	10.9084	-8.47353	6.92e-14	7.73e-13	20.917	DOWN
RPA3	-1.12384	12.7841	-8.4734	6.93e-14	7.73e-13	20.9163	DOWN
PRADC1	-0.988424	9.33498	-8.46991	7.06e-14	7.88e-13	20.8978	DOWN
TCF20	0.724032	9.40356	8.46634	7.2e-14	8.02e-13	20.8788	UP
EMD	0.848444	9.47987	8.46554	7.23e-14	8.06e-13	20.8746	UP
NDUFAF2	-1.05099	10.8521	-8.46514	7.24e-14	8.07e-13	20.8724	DOWN
LBP	2.07044	6.03735	8.46146	7.39e-14	8.22e-13	20.8529	UP
TMEM135	-0.81787	10.1166	-8.46111	7.4e-14	8.24e-13	20.851	DOWN
MOBP	2.03547	5.6604	8.4599	7.45e-14	8.28e-13	20.8446	UP
RANBP1	0.997949	12.0984	8.45893	7.49e-14	8.32e-13	20.8394	UP
TOR1AIP1	-0.848447	11.9128	-8.45744	7.55e-14	8.39e-13	20.8315	DOWN
WBP2	1.43061	9.57309	8.45419	7.68e-14	8.53e-13	20.8142	UP
CENATAC	0.919648	10.262	8.45183	7.78e-14	8.63e-13	20.8017	UP
LINC00689	0.992445	7.71243	8.44999	7.86e-14	8.71e-13	20.7919	UP
CALR	0.805431	12.3385	8.44914	7.89e-14	8.74e-13	20.7874	UP
EME2	1.47973	8.22105	8.44853	7.92e-14	8.77e-13	20.7842	UP
EBAG9	-0.733588	11.6839	-8.44837	7.93e-14	8.77e-13	20.7833	DOWN
CRACR2A	1.01899	9.19229	8.44817	7.94e-14	8.78e-13	20.7822	UP
CABP4	1.26205	7.67908	8.44666	8e-14	8.84e-13	20.7742	UP
NT5C3A	-1.15818	11.7626	-8.44458	8.09e-14	8.94e-13	20.7632	DOWN
ATAD3A	0.953819	9.54558	8.44401	8.11e-14	8.96e-13	20.7602	UP
NTAQ1	-0.897564	10.2489	-8.44316	8.15e-14	9e-13	20.7557	DOWN
SHFL	0.905295	10.136	8.43927	8.32e-14	9.18e-13	20.735	UP
FANCF	-0.793246	9.48587	-8.43707	8.42e-14	9.28e-13	20.7233	DOWN
RECQL5	1.37084	8.6197	8.43705	8.42e-14	9.28e-13	20.7232	UP
CLUHP3	1.07275	8.78819	8.43496	8.52e-14	9.38e-13	20.7121	UP
ACSS2	1.07995	8.42486	8.43486	8.52e-14	9.38e-13	20.7116	UP
ESS2	1.64445	6.71563	8.43167	8.67e-14	9.54e-13	20.6946	UP
LYPD4	2.08357	5.25908	8.43026	8.74e-14	9.6e-13	20.6872	UP
TFAM	-0.940568	11.3727	-8.43024	8.74e-14	9.6e-13	20.687	DOWN
CPA4	1.31467	6.83063	8.42945	8.78e-14	9.64e-13	20.6828	UP
LPCAT4	1.42741	8.29114	8.42927	8.78e-14	9.64e-13	20.6819	UP
SNRPG	-1.11024	14.5541	-8.42769	8.86e-14	9.72e-13	20.6735	DOWN
RSKR	1.98744	7.55879	8.42734	8.87e-14	9.73e-13	20.6717	UP
BCL2L2	0.985834	8.82872	8.42546	8.97e-14	9.82e-13	20.6617	UP
SULT1A2	0.814739	9.33668	8.42474	9e-14	9.86e-13	20.6578	UP
SPA17	-1.11089	8.5618	-8.42368	9.05e-14	9.91e-13	20.6523	DOWN
FGF4	1.30201	6.9665	8.42352	9.06e-14	9.91e-13	20.6514	UP
MOB1A	-1.05937	12.8982	-8.42277	9.1e-14	9.94e-13	20.6474	DOWN
CPT2	-0.795829	9.5407	-8.42236	9.12e-14	9.96e-13	20.6453	DOWN
P4HA1	1.15821	10.015	8.4221	9.13e-14	9.97e-13	20.6438	UP
H6PD	1.32304	8.64369	8.41889	9.29e-14	1.01e-12	20.6268	UP
ESPL1	1.11193	10.2565	8.41856	9.3e-14	1.02e-12	20.6251	UP
PPA2	-1.07904	11.7067	-8.4123	9.62e-14	1.05e-12	20.5918	DOWN
CD164	-0.838923	13.1649	-8.41188	9.64e-14	1.05e-12	20.5896	DOWN
NCR2	1.02554	7.90954	8.41165	9.66e-14	1.05e-12	20.5884	UP
WDFY4	1.08202	10.7437	8.40497	1e-13	1.09e-12	20.553	UP
WDR74	0.80127	9.80564	8.403	1.01e-13	1.1e-12	20.5425	UP
URGCP	1.06783	9.16514	8.40298	1.01e-13	1.1e-12	20.5424	UP
LOC101928894	1.46905	7.38047	8.40248	1.01e-13	1.1e-12	20.5398	UP
MAG	2.06068	5.27525	8.40134	1.02e-13	1.11e-12	20.5337	UP
CPSF3	-0.6993	11.6371	-8.40064	1.02e-13	1.11e-12	20.53	DOWN
GYG2	1.50938	6.63243	8.396	1.05e-13	1.14e-12	20.5054	UP
GON4L	0.732519	9.72786	8.39441	1.06e-13	1.15e-12	20.4969	UP
CDC37	0.967187	10.3736	8.39237	1.07e-13	1.16e-12	20.4862	UP
DOCK1	1.09913	7.56109	8.3896	1.09e-13	1.18e-12	20.4715	UP
ELOF1	0.718262	9.91954	8.38945	1.09e-13	1.18e-12	20.4706	UP
MRPL35	-1.1158	11.1679	-8.38752	1.1e-13	1.19e-12	20.4604	DOWN
C15orf61	-0.995361	10.3115	-8.38658	1.1e-13	1.19e-12	20.4554	DOWN
GIGYF2	0.674273	9.76785	8.38097	1.14e-13	1.23e-12	20.4257	UP
MRPL42	-1.1407	11.5378	-8.37931	1.15e-13	1.24e-12	20.4169	DOWN
TCF19	1.11005	9.70139	8.37906	1.15e-13	1.24e-12	20.4156	UP
NIPSNAP1	0.771403	10.4188	8.37815	1.16e-13	1.25e-12	20.4108	UP
TLR4	-1.34447	9.21313	-8.37557	1.17e-13	1.26e-12	20.3971	DOWN
BPIFB6	1.70538	4.4025	8.37552	1.17e-13	1.26e-12	20.3968	UP
GET3	0.95687	10.0038	8.37516	1.17e-13	1.27e-12	20.3949	UP
ARL8A	1.62747	8.73002	8.37409	1.18e-13	1.27e-12	20.3892	UP
TSPAN14	0.916501	9.25917	8.37224	1.19e-13	1.28e-12	20.3794	UP
BFAR	-0.651627	10.7407	-8.37193	1.19e-13	1.28e-12	20.3778	DOWN
RXYLT1	-0.795066	10.5551	-8.37135	1.2e-13	1.29e-12	20.3747	DOWN
G6PD	1.26832	9.36534	8.36912	1.21e-13	1.3e-12	20.3629	UP
MIDEAS	1.2822	9.6849	8.36825	1.22e-13	1.31e-12	20.3583	UP
ZNF202	0.663107	9.12455	8.3649	1.24e-13	1.33e-12	20.3405	UP
AIF1	-1.41681	12.2431	-8.36461	1.24e-13	1.33e-12	20.339	DOWN
SAFB2	0.734087	10.6304	8.36382	1.25e-13	1.34e-12	20.3348	UP
ARHGAP45	1.04381	11.3015	8.3634	1.25e-13	1.34e-12	20.3326	UP
SNRNP27	-0.594912	11.4816	-8.36182	1.26e-13	1.35e-12	20.3242	DOWN
BCL2L1	1.12983	9.80335	8.36119	1.27e-13	1.35e-12	20.3209	UP
RTL9	1.70391	5.93942	8.36111	1.27e-13	1.35e-12	20.3205	UP
ALKBH6	0.60823	9.66121	8.35935	1.28e-13	1.37e-12	20.3111	UP
DYNLT3	-0.90891	11.1676	-8.35871	1.28e-13	1.37e-12	20.3078	DOWN
FUT6	1.0333	8.6048	8.35789	1.29e-13	1.38e-12	20.3034	UP
JAK3	1.13839	11.5362	8.35277	1.32e-13	1.41e-12	20.2763	UP
NMUR2	1.84956	6.49624	8.35152	1.33e-13	1.42e-12	20.2697	UP
NOL6	1.19647	8.36831	8.3502	1.34e-13	1.43e-12	20.2627	UP
SCOC	-1.21165	11.5294	-8.34953	1.35e-13	1.43e-12	20.2591	DOWN
BCL2L12	0.918493	9.41019	8.34951	1.35e-13	1.43e-12	20.259	UP
ZNF644	-0.615235	11.194	-8.34903	1.35e-13	1.44e-12	20.2565	DOWN
LIN7C	-0.627269	10.9145	-8.34744	1.36e-13	1.45e-12	20.248	DOWN
PGLYRP4	1.74157	6.68612	8.34517	1.38e-13	1.47e-12	20.236	UP
FASTK	0.694126	10.4575	8.34294	1.4e-13	1.48e-12	20.2242	UP
KCTD12	-0.993633	12.3122	-8.34201	1.4e-13	1.49e-12	20.2193	DOWN
OR51I2	1.64816	6.69316	8.34133	1.41e-13	1.49e-12	20.2157	UP
TBC1D9B	0.833305	10.5827	8.34021	1.42e-13	1.5e-12	20.2098	UP
CETN1	1.85768	6.0804	8.33864	1.43e-13	1.51e-12	20.2014	UP
OPN5	0.846136	7.39868	8.33815	1.43e-13	1.52e-12	20.1989	UP
KMT2D	1.25013	10.563	8.33785	1.43e-13	1.52e-12	20.1973	UP
CLEC16A	0.74053	8.84053	8.33688	1.44e-13	1.53e-12	20.1921	UP
IFNGR1	-1.02317	12.8012	-8.33638	1.45e-13	1.53e-12	20.1895	DOWN
PHF7	1.02304	7.4499	8.33542	1.45e-13	1.54e-12	20.1844	UP
COX7C	-0.780267	14.7568	-8.33322	1.47e-13	1.55e-12	20.1728	DOWN
SERTAD3	1.41955	8.11427	8.33094	1.49e-13	1.57e-12	20.1607	UP
IDUA	1.15416	8.54801	8.32907	1.5e-13	1.59e-12	20.1508	UP
WDR59	0.615906	9.99396	8.32717	1.52e-13	1.6e-12	20.1408	UP
INTS14	0.615016	9.79077	8.3256	1.53e-13	1.61e-12	20.1324	UP
TUT4	0.829856	10.0724	8.32462	1.54e-13	1.62e-12	20.1272	UP
DTX4	1.22319	9.47764	8.32403	1.54e-13	1.63e-12	20.1241	UP
UBE2Q2	-0.902433	10.9836	-8.32298	1.55e-13	1.63e-12	20.1186	DOWN
TMEM174	1.26319	7.21884	8.32161	1.56e-13	1.65e-12	20.1113	UP
CERS2	0.809345	10.8158	8.32158	1.57e-13	1.65e-12	20.1112	UP
BPNT2	0.774965	9.82247	8.3212	1.57e-13	1.65e-12	20.1092	UP
PRPF3	0.846575	9.70604	8.32114	1.57e-13	1.65e-12	20.1088	UP
SLC7A6	1.16324	10.6645	8.31847	1.59e-13	1.67e-12	20.0947	UP
CYHR1	1.15217	8.14814	8.31796	1.6e-13	1.67e-12	20.092	UP
FUNDC1	-0.956427	10.5687	-8.31779	1.6e-13	1.67e-12	20.0911	DOWN
MRPL39	-1.02288	11.9634	-8.31764	1.6e-13	1.68e-12	20.0903	DOWN
CD99L2	1.0157	8.77151	8.31746	1.6e-13	1.68e-12	20.0894	UP
TMEM38B	-1.3044	9.62268	-8.31208	1.65e-13	1.72e-12	20.0609	DOWN
EIF4E2	-0.795911	11.6941	-8.30908	1.67e-13	1.75e-12	20.045	DOWN
NPHP4	1.23713	7.37185	8.307	1.69e-13	1.77e-12	20.0341	UP
SUCLG1	-0.733513	12.2931	-8.30683	1.69e-13	1.77e-12	20.0331	DOWN
KIAA1614	1.21934	4.13389	8.30613	1.7e-13	1.78e-12	20.0295	UP
ARSK	2.18605	7.28544	8.3049	1.71e-13	1.79e-12	20.023	UP
DPP8	-0.620104	11.5814	-8.30423	1.72e-13	1.79e-12	20.0194	DOWN
BRD1	0.836368	9.42578	8.30289	1.73e-13	1.8e-12	20.0123	UP
H1-3	-1.82317	7.96722	-8.3023	1.74e-13	1.81e-12	20.0092	DOWN
RYR3-DT	1.77047	5.66174	8.30109	1.75e-13	1.82e-12	20.0028	UP
PRXL2C	-1.20146	9.9876	-8.29996	1.76e-13	1.83e-12	19.9969	DOWN
PTPRA	0.765638	9.61234	8.29863	1.77e-13	1.84e-12	19.9898	UP
BNIP2	-0.727623	10.9621	-8.29375	1.82e-13	1.89e-12	19.964	DOWN
PGGHG	1.80434	9.05864	8.29347	1.82e-13	1.89e-12	19.9625	UP
SBNO1	1.14504	9.52025	8.29035	1.85e-13	1.92e-12	19.946	UP
MMP24OS	0.656734	10.0905	8.28953	1.86e-13	1.93e-12	19.9417	UP
MKNK1	0.691477	10.3938	8.28835	1.87e-13	1.94e-12	19.9355	UP
ATAD3B	0.821337	9.30255	8.28816	1.87e-13	1.94e-12	19.9345	UP
UCN	2.02039	5.70036	8.28676	1.89e-13	1.95e-12	19.927	UP
POMGNT1	0.782198	8.44677	8.28494	1.9e-13	1.97e-12	19.9174	UP
POLD2	0.902141	10.2804	8.28435	1.91e-13	1.98e-12	19.9143	UP
UBQLN4	0.801781	9.91915	8.28335	1.92e-13	1.99e-12	19.909	UP
LRRC37A2	1.06995	10.7911	8.28232	1.93e-13	2e-12	19.9036	UP
ALG3	0.727035	9.5534	8.28228	1.93e-13	2e-12	19.9034	UP
NAPB	0.900543	8.43185	8.28065	1.95e-13	2.01e-12	19.8948	UP
BCS1L	0.818277	9.97434	8.28055	1.95e-13	2.01e-12	19.8943	UP
PRMT8	1.51789	6.00608	8.27976	1.96e-13	2.02e-12	19.8901	UP
ANKRD10	1.19541	10.7445	8.27962	1.96e-13	2.02e-12	19.8893	UP
JMJD8	0.659878	9.05698	8.27904	1.97e-13	2.03e-12	19.8863	UP
CLK1	0.862369	10.4801	8.27746	1.98e-13	2.04e-12	19.8779	UP
NSUN5P1	1.09602	10.6432	8.2759	2e-13	2.06e-12	19.8697	UP
KIFC1	1.02049	9.77913	8.27418	2.02e-13	2.08e-12	19.8606	UP
ODF3B	0.954982	8.79834	8.27329	2.03e-13	2.09e-12	19.8559	UP
COPB2	-0.661569	11.9897	-8.27125	2.05e-13	2.11e-12	19.8451	DOWN
TXNL1	-0.771758	13.5157	-8.27024	2.06e-13	2.12e-12	19.8398	DOWN
SMARCB1	1.20051	11.0322	8.26979	2.07e-13	2.12e-12	19.8374	UP
ITSN1	0.905471	8.40626	8.26851	2.08e-13	2.14e-12	19.8306	UP
WWTR1	-1.55001	9.14578	-8.26265	2.15e-13	2.2e-12	19.7997	DOWN
FMO4	0.972358	8.92892	8.26194	2.15e-13	2.21e-12	19.796	UP
RAD9A	0.809367	9.65519	8.26041	2.17e-13	2.23e-12	19.7879	UP
STAM2	-0.975898	10.1029	-8.26027	2.17e-13	2.23e-12	19.7871	DOWN
PVR	0.754187	8.35026	8.25959	2.18e-13	2.23e-12	19.7835	UP
CLSTN3	1.52668	7.42955	8.25815	2.2e-13	2.25e-12	19.7759	UP
DGKA	1.28498	10.1161	8.25618	2.22e-13	2.27e-12	19.7655	UP
CCNL1	0.973203	11.1806	8.25516	2.23e-13	2.28e-12	19.7601	UP
APOBEC4	1.67262	6.23435	8.25183	2.27e-13	2.32e-12	19.7426	UP
PSMA7	-0.837021	13.149	-8.24872	2.31e-13	2.36e-12	19.7261	DOWN
ARL14EP	-0.750359	10.2576	-8.24712	2.33e-13	2.38e-12	19.7177	DOWN
MAP3K14	0.922437	9.03924	8.24215	2.39e-13	2.44e-12	19.6915	UP
SYN1	1.74359	5.6804	8.24202	2.4e-13	2.44e-12	19.6908	UP
HMGXB4	-0.704353	10.415	-8.2402	2.42e-13	2.46e-12	19.6812	DOWN
LEPR	1.38877	6.85422	8.23581	2.48e-13	2.52e-12	19.658	UP
SRPRB	-0.854232	11.8383	-8.23364	2.51e-13	2.55e-12	19.6466	DOWN
PPIL1	-1.04867	11.3218	-8.23307	2.51e-13	2.55e-12	19.6436	DOWN
SRCAP	1.61055	7.17173	8.23104	2.54e-13	2.58e-12	19.6328	UP
ANAPC16	-0.719983	13.058	-8.22786	2.58e-13	2.62e-12	19.6161	DOWN
MTX3	0.863215	9.78301	8.2274	2.59e-13	2.63e-12	19.6136	UP
CCDC85B	0.95866	10.224	8.22739	2.59e-13	2.63e-12	19.6136	UP
COX10-AS1	1.33867	7.3931	8.22379	2.64e-13	2.68e-12	19.5946	UP
TEX48	1.82002	6.58582	8.22258	2.66e-13	2.69e-12	19.5882	UP
FURIN	1.77904	7.34861	8.22243	2.66e-13	2.69e-12	19.5874	UP
SCYL1	0.803787	9.32816	8.22218	2.66e-13	2.7e-12	19.5861	UP
FAM234A	0.750624	9.08056	8.22195	2.67e-13	2.7e-12	19.5849	UP
POLR1D	-1.01412	12.7797	-8.22085	2.68e-13	2.71e-12	19.5791	DOWN
C2CD2L	1.49433	7.74827	8.21997	2.7e-13	2.72e-12	19.5744	UP
OAT	-1.22268	11.8389	-8.21884	2.71e-13	2.74e-12	19.5685	DOWN
KCNAB3	2.01181	5.74539	8.21485	2.77e-13	2.8e-12	19.5474	UP
ZNF431	1.01059	8.0715	8.2138	2.79e-13	2.81e-12	19.5419	UP
SLC7A9	1.73453	6.44639	8.21336	2.79e-13	2.82e-12	19.5396	UP
NFYC	0.759278	9.96842	8.20976	2.85e-13	2.87e-12	19.5206	UP
ZNF536	1.93639	5.71126	8.2077	2.88e-13	2.9e-12	19.5098	UP
AKR7A3	0.968747	8.34223	8.2069	2.89e-13	2.91e-12	19.5055	UP
RALA	-0.695526	12.1403	-8.20518	2.92e-13	2.94e-12	19.4965	DOWN
WHAMMP2	1.33863	8.45556	8.20469	2.92e-13	2.94e-12	19.4939	UP
MDC1	0.89377	9.56277	8.20195	2.97e-13	2.98e-12	19.4795	UP
ZSCAN10	1.79797	5.6567	8.19971	3e-13	3.02e-12	19.4677	UP
CEP95	0.771514	9.41722	8.19796	3.03e-13	3.04e-12	19.4584	UP
MANBA	0.664273	9.37298	8.19754	3.04e-13	3.05e-12	19.4562	UP
CYB561	0.752108	8.7151	8.19594	3.06e-13	3.07e-12	19.4478	UP
LOC100505918	1.18923	7.62676	8.19096	3.15e-13	3.16e-12	19.4215	UP
UBE2W	-0.890329	10.3162	-8.1887	3.18e-13	3.19e-12	19.4096	DOWN
ORC3	-0.693949	9.84313	-8.1838	3.27e-13	3.27e-12	19.3838	DOWN
DNHD1	1.66957	7.19639	8.18287	3.29e-13	3.29e-12	19.3789	UP
ZNF180	-0.750797	8.2709	-8.17821	3.37e-13	3.37e-12	19.3544	DOWN
LMNB2	1.33085	9.24908	8.17609	3.41e-13	3.41e-12	19.3432	UP
FRAT2	1.02042	8.78616	8.1738	3.45e-13	3.45e-12	19.3312	UP
SLC2A1	0.749949	9.44614	8.17274	3.47e-13	3.46e-12	19.3256	UP
KRTAP8-1	1.31445	7.10561	8.17216	3.48e-13	3.47e-12	19.3225	UP
SCMH1	0.979711	8.78222	8.17205	3.48e-13	3.47e-12	19.322	UP
MUC17	2.00969	6.11299	8.17125	3.5e-13	3.49e-12	19.3177	UP
DUSP28	-0.787378	10.0886	-8.17013	3.52e-13	3.51e-12	19.3119	DOWN
NEK8	0.994261	9.0156	8.16839	3.55e-13	3.54e-12	19.3027	UP
RAB39B	-1.27912	8.66208	-8.16717	3.57e-13	3.56e-12	19.2963	DOWN
ZGLP1	1.79168	6.87927	8.16333	3.65e-13	3.63e-12	19.2761	UP
EMC2	-0.669943	11.0358	-8.15957	3.72e-13	3.7e-12	19.2563	DOWN
DDX59	0.762599	9.80536	8.15644	3.78e-13	3.76e-12	19.2398	UP
UPF2	0.92436	10.2212	8.15563	3.8e-13	3.78e-12	19.2355	UP
STIM1	0.848065	8.26382	8.15291	3.85e-13	3.83e-12	19.2212	UP
CCDC137	0.98158	9.43068	8.15277	3.86e-13	3.83e-12	19.2205	UP
LINC00260	1.94817	5.27721	8.15165	3.88e-13	3.85e-12	19.2146	UP
PARP10	0.855714	9.59885	8.15113	3.89e-13	3.86e-12	19.2119	UP
USP16	-0.594397	11.7639	-8.14979	3.92e-13	3.89e-12	19.2048	DOWN
UNC45A	0.730438	9.45192	8.14953	3.92e-13	3.89e-12	19.2034	UP
IDI1	-1.046	12.2603	-8.14862	3.94e-13	3.91e-12	19.1987	DOWN
NEDD8	-0.799059	12.8267	-8.14458	4.03e-13	3.99e-12	19.1774	DOWN
CHKB	0.913493	10.431	8.14438	4.03e-13	3.99e-12	19.1764	UP
PPP1R3E	1.32348	8.56412	8.14301	4.06e-13	4.02e-12	19.1691	UP
TNFRSF1A	1.24809	9.15017	8.14197	4.09e-13	4.04e-12	19.1637	UP
POGK	1.00611	10.33	8.14072	4.11e-13	4.06e-12	19.1571	UP
PRMT3	-0.936133	10.2445	-8.14072	4.11e-13	4.06e-12	19.1571	DOWN
SUV39H1	0.938267	9.34356	8.13919	4.15e-13	4.09e-12	19.1491	UP
FBXW12	1.09341	9.66177	8.13914	4.15e-13	4.09e-12	19.1488	UP
NRDC	0.736462	11.373	8.13479	4.24e-13	4.18e-12	19.126	UP
RPS21	-0.678689	15.7485	-8.13462	4.25e-13	4.19e-12	19.125	DOWN
WFDC8	1.60707	6.13482	8.13252	4.3e-13	4.23e-12	19.114	UP
KRTAP4-8	1.05784	7.13564	8.13094	4.33e-13	4.27e-12	19.1057	UP
ZSCAN22	0.799113	7.94372	8.12955	4.36e-13	4.29e-12	19.0984	UP
JOSD2	1.3615	8.0121	8.12723	4.42e-13	4.35e-12	19.0862	UP
STX12	-0.702087	11.0606	-8.12568	4.46e-13	4.38e-12	19.0781	DOWN
IFT74	-1.54009	7.463	-8.12519	4.47e-13	4.39e-12	19.0754	DOWN
GTF2H5	-0.934877	11.7329	-8.12326	4.51e-13	4.43e-12	19.0653	DOWN
DPP6	1.90002	6.03446	8.12097	4.57e-13	4.48e-12	19.0533	UP
ZC3H7B	1.46252	8.22171	8.12088	4.57e-13	4.48e-12	19.0528	UP
HPS6	0.727259	9.30871	8.12013	4.59e-13	4.5e-12	19.0489	UP
FAM174C	0.865851	9.11026	8.11628	4.68e-13	4.59e-12	19.0287	UP
NDST2	0.814196	9.84399	8.11571	4.7e-13	4.6e-12	19.0256	UP
[truncated: 6,247 more rows]
