# Supplementary material for: Prediction significance of autophagy-related genes in survival probability and drug resistance in diffuse large B-cell lymphoma
Source: Aging (Albany NY). 2024 Jan 17;16(2):1049–76. doi: 10.18632/aging.205282 (PMC10866451; doi:10.18632/aging.205282)
Supplement: Supplementary Table 3 [file aging-16-205282-s004.xls]

Supplementary Table 3. The genes significantly associated with survival.
Code	uni_cox_sig_genes	Hazard_Ratio	lower.95..CI	upper.95..CI	p.value
1	CCL5	0.800023464	0.660683452	0.968750678	0.022305469
2	SLC39A13	1.361957065	1.011544274	1.833757646	0.041790796
3	TMEM106A	1.950277569	1.138995835	3.339417476	0.014922626
4	ALMS1P1	1.397460564	1.064819157	1.834016618	0.015831903
5	MYO3B	0.815130666	0.704908495	0.942587596	0.005822156
6	IFNL1	1.292774033	1.030248515	1.622195689	0.026604327
7	ASB11	0.824177086	0.680910558	0.997587512	0.04717165
8	RASEF	0.84649009	0.724180181	0.989457447	0.036342664
9	ZNF441	0.806478991	0.659212164	0.986644966	0.036558913
10	KRT78	1.349142896	1.009958981	1.802238098	0.042658261
11	BRWD3	0.669658586	0.473441949	0.947196638	0.023414204
12	ZNF718	0.781517841	0.631235487	0.967578894	0.023670049
13	POU5F2	1.433981895	1.10954484	1.853286141	0.005882717
14	SLC18A2	1.327481043	1.05783237	1.665864998	0.014474614
15	ERVW.1	1.299534641	1.056012478	1.599214325	0.013333534
16	FLJ40288	1.289611461	1.001570405	1.660490077	0.048594634
17	A2ML1	1.27259975	1.027840183	1.57564391	0.026971658
18	NLRP13	1.361608561	1.049587227	1.766387611	0.020103113
19	NLRP8	1.245982841	1.006834632	1.541934685	0.04311368
20	VN1R5	1.342057214	1.065037272	1.691131018	0.012626472
21	ND2	1.657729726	1.094239411	2.51139542	0.017083826
22	GPR26	1.333581509	1.01538639	1.751490524	0.038475911
23	SLC22A24	1.327399311	1.014653783	1.73654202	0.038820275
24	B3GALT6	1.849473047	1.184161363	2.888584831	0.006871318
25	CCDC60	1.283315245	1.018894954	1.616357027	0.034092729
26	MCPH1	0.590771386	0.398142948	0.87659679	0.008945662
27	BTG4	1.257379221	1.0345116	1.528259814	0.021401979
28	DNAJC14	1.425702123	1.019768273	1.993223947	0.038036399
29	TMEM37	1.561169764	1.063770134	2.291144444	0.022857376
30	SYMPK	1.431819506	1.060160075	1.933771274	0.019233941
31	S100Z	0.793860118	0.686532889	0.917966055	0.001839868
32	TSPEAR.AS2	1.310803072	1.042580342	1.648030972	0.020506645
33	TLL1	1.326923435	1.04192479	1.689878022	0.021855297
34	ST3GAL3	1.24861771	1.017982167	1.531506382	0.033087854
35	PP2672	1.245937831	1.006179334	1.542827433	0.043752282
36	CWC27	0.694355009	0.487330971	0.989325341	0.043448097
37	STH	1.434935765	1.091513907	1.886408076	0.0096716
38	KLF6	1.808766734	1.244937495	2.627952896	0.001874404
39	PSMB8.AS1	0.648153518	0.437272782	0.960734351	0.030815439
40	SPIN3	1.455029999	1.04479779	2.026336883	0.026466463
41	C22orf42	1.262674139	1.028869399	1.54960968	0.025590298
42	RAB11B.AS1	0.739092501	0.593345206	0.920640665	0.006980194
43	POM121L12	1.215015541	1.022165831	1.444249768	0.027203603
44	MIF.AS1	0.750258167	0.59109769	0.9522746	0.01817953
45	C20orf203	1.569065673	1.128782766	2.18108139	0.007342689
46	DLEU2	1.314458254	1.001364331	1.72544642	0.04886289
47	NPHP3.AS1	1.336916254	1.045095589	1.710221619	0.020831598
48	KCP	1.528115468	1.089795824	2.142728787	0.013950676
49	BTBD19	1.234134839	1.008671079	1.509995509	0.040968919
50	FAM111B	0.841313245	0.742303288	0.953529358	0.006833409
51	MIR570HG	1.341861159	1.049973425	1.714892327	0.018793085
52	NT5C	1.448391534	1.063701163	1.972206205	0.018670273
53	TMEM272	1.263878916	1.026909326	1.555531606	0.027062163
54	NANOS2	1.315245505	1.042254028	1.659740036	0.020963729
55	MAP3K14.AS1	1.543976449	1.140347373	2.090471141	0.004963155
56	ATP5MF	1.255191205	1.021471551	1.542387507	0.03061451
57	TONSL	1.281846474	1.029521243	1.596014064	0.026412247
58	DRAXIN	1.263866336	1.001980174	1.59420132	0.04807985
59	GARS1.DT	1.539956512	1.037521317	2.285703455	0.032131441
60	TMCC1.AS1	1.476245338	1.064365948	2.047510353	0.01961086
61	NALT1	1.609573849	1.073225101	2.413965136	0.021351935
62	FAM53B.AS1	1.327170633	1.059179547	1.662968184	0.013910557
63	GRIK1.AS2	0.768402543	0.624079321	0.946101638	0.013066503
64	GAS5	1.55090413	1.069493646	2.249011603	0.020652625
65	ARHGEF1	1.59776135	1.153531118	2.213066721	0.004813473
66	TMPRSS11B	1.347639176	1.028607282	1.765621711	0.030418304
67	CASC11	1.335061441	1.017972946	1.750919864	0.036733096
68	TMEM105	1.302485706	1.016953173	1.668187936	0.03633922
69	HOXC.AS3	1.570418288	1.158956947	2.127959634	0.003595558
70	NPSR1.AS1	1.209050562	1.004337365	1.455490268	0.044889228
71	C10orf90	1.50782415	1.067144405	2.130483613	0.019889439
72	ERBB3	1.47200954	1.094919309	1.978969653	0.010451809
73	AK9	0.865353109	0.753382568	0.993965132	0.040797271
74	RELL2	1.672503225	1.134068926	2.46657586	0.009468343
75	SLC24A3.AS1	1.445029178	1.040999818	2.005869058	0.027799278
76	IFITM10	0.809041367	0.655874452	0.997977481	0.047830607
77	TAS1R1	1.219256104	1.017022966	1.461702927	0.032162734
78	SNHG4	1.410560862	1.050361618	1.8942828	0.022220711
79	TNK2.AS1	1.406203251	1.023132192	1.932699995	0.035649552
80	SNORA71A	1.349685112	1.076341208	1.692446491	0.009401045
81	SNORD8	0.671831101	0.484073933	0.932413416	0.017387118
82	PER3P1	1.336224655	1.046106349	1.706801924	0.020292686
83	STPG3	0.779979952	0.631225615	0.963789667	0.021358825
84	OR5J2	1.289356323	1.009247411	1.647207325	0.04198987
85	OR5H1	0.80617735	0.677252519	0.95964489	0.015381665
86	CECR9	1.31724588	1.015606632	1.708473196	0.037831323
87	ZNF519	1.455468582	1.044166737	2.028784025	0.026758336
88	SLC44A3.AS1	0.765241269	0.615106642	0.95202061	0.016340439
89	PPARGC1A	1.309144666	1.053601609	1.626667748	0.015047965
90	GRIN2C	1.596347379	1.086751475	2.344901308	0.017125281
91	FOXR2	1.450826795	1.096520841	1.919615488	0.009188278
92	TMEM150B	1.362635982	1.062440058	1.747653249	0.014809724
93	CYGB	1.582738716	1.016902794	2.463423109	0.041929079
94	ABCF1	1.728454	1.063729905	2.80856373	0.027146566
95	HSP90AB1	1.662823875	1.010683824	2.735754915	0.04530644
96	AP2M1	1.494432824	1.062320458	2.102312396	0.021046566
97	PTPRF	0.770208456	0.608229945	0.975323676	0.030206272
98	NUCB1	1.248849112	1.00393269	1.553514614	0.046020631
99	LAPTM4A	0.53013597	0.315501502	0.890785449	0.016541705
100	ACADVL	1.520584346	1.13074849	2.044819669	0.005553833
101	ACTR2	0.596811206	0.407839964	0.873341622	0.007880553
102	NFE2L1	1.838323416	1.07528367	3.142829261	0.026064682
103	LAMP2	0.712825451	0.522406051	0.972653593	0.032775527
104	HYOU1	1.39566181	1.055375776	1.845666663	0.019389931
105	FKBP4	1.66770376	1.168767296	2.379631806	0.004805968
106	PALLD	0.646661452	0.464948783	0.899391608	0.009599111
107	DEK	0.517376756	0.308653059	0.867247868	0.012405691
108	HSBP1	0.631939702	0.434204455	0.919722915	0.016529306
109	ABLIM1	0.811046525	0.658235437	0.999333109	0.049272376
110	MDH1	0.630418345	0.401213229	0.990563774	0.045383165
111	HIF1A	0.35430204	0.198035287	0.633876607	0.000472196
112	TRIM28	1.591470369	1.033588022	2.450471447	0.034860146
113	AARS1	1.821538153	1.080794965	3.069963638	0.024341071
114	ANXA1	0.7534193	0.568456636	0.998564543	0.04884311
115	ADD3	0.425127687	0.275839921	0.655211724	0.00010634
116	PFKP	1.589668898	1.008789694	2.50502877	0.04575138
117	GOLGB1	1.71905513	1.131373953	2.61200157	0.011140649
118	SNU13	2.031222433	1.161123411	3.553338545	0.013009332
119	ARF4	0.608584046	0.376333566	0.984165577	0.042862434
120	CPE	0.779305231	0.633628162	0.958474826	0.018193609
121	PGD	1.715543639	1.144917404	2.570569692	0.00890004
122	MFN2	1.793332362	1.07970714	2.978623406	0.024057689
123	IGFBP7	0.579506646	0.416966039	0.805408405	0.001160188
124	PLS3	0.692439041	0.531618744	0.901909181	0.006418708
125	PSMD13	1.897834725	1.144406953	3.147286578	0.013042068
126	SRP9	0.689323269	0.477975196	0.994123907	0.046424763
127	SH3BGRL	0.60088353	0.361413484	0.999024756	0.04956191
128	LAMB1	0.786819419	0.620452343	0.997795891	0.047909577
129	SRM	1.505249018	1.072090398	2.113417497	0.018176101
130	APOD	1.207429721	1.024931408	1.42242351	0.024164586
131	ATP6V1F	1.589388406	1.012220878	2.495656391	0.044143241
132	UBL3	0.710570647	0.530440257	0.9518709	0.021984217
133	IRAK1	1.622399233	1.10982004	2.371717195	0.012496357
134	OAT	0.736710134	0.547196476	0.991859133	0.044026651
135	SND1	1.610168297	1.018280929	2.546096927	0.041604851
136	DARS1	0.686916314	0.496573579	0.950219752	0.02330519
137	BST2	1.595102238	1.117373985	2.277081071	0.010139132
138	IFNGR2	1.499091827	1.018964592	2.20545083	0.039846226
139	KDM3B	1.753556688	1.027297479	2.993252802	0.039524909
140	CNIH1	0.664920217	0.448947679	0.984789355	0.041705017
141	ITGA6	0.746631011	0.560079587	0.995319022	0.046376407
142	ARL1	0.543420307	0.317886747	0.928964901	0.025793466
143	TIMP1	0.674949183	0.53036945	0.858941628	0.001392315
144	GJA1	0.714210394	0.571688502	0.89226298	0.003039203
145	PNP	1.532352308	1.03875622	2.260495341	0.031424506
146	ENTPD6	2.306606838	1.415741076	3.758056607	0.000791088
147	ELAVL1	1.61629049	1.042761645	2.505265669	0.031775443
148	TWF1	0.575735588	0.382304918	0.867034276	0.00821834
149	ADAR	1.970091187	1.110427586	3.49528356	0.02044721
150	DHCR7	1.425247878	1.012462927	2.00632681	0.042259605
151	EFEMP1	0.759732266	0.611317607	0.944178786	0.013214674
152	NR3C1	0.403463753	0.232304842	0.700730123	0.00127028
153	FAM3C	0.696376355	0.503661499	0.962829259	0.028588448
154	DVL3	1.395921912	1.058673403	1.840603514	0.018075456
155	COASY	1.850071952	1.100151072	3.111178379	0.020347619
156	CCNC	0.649551721	0.449583194	0.938463546	0.021547016
157	PPP5C	1.410770419	1.05475375	1.886955295	0.020383388
158	TJP1	0.594378867	0.40169933	0.879479282	0.009257789
159	ALDOC	0.748787269	0.566729493	0.989329798	0.041806613
160	EFNA1	0.785577066	0.646582346	0.954451246	0.015131689
161	MAN2A2	1.41538697	1.070467965	1.871443463	0.014776575
162	PLTP	1.236059557	1.002487568	1.524052044	0.047343578
163	RALB	1.428558579	1.011810931	2.016957468	0.042694736
164	SLC4A2	1.280059781	1.01592668	1.612865451	0.036262574
165	CPNE3	0.654916591	0.473351066	0.906126069	0.010617242
166	ABL1	1.540868988	1.034175499	2.295816562	0.03357473
167	WWTR1	0.781920968	0.642921559	0.950972	0.013764457
168	MMS19	1.876975985	1.047224849	3.364166587	0.034433808
169	KAT2A	1.628071607	1.084089205	2.445017574	0.018818436
170	MTMR3	1.584669247	1.02001775	2.461895021	0.040546261
171	KHDC4	1.734039556	1.107014469	2.716218501	0.016218202
172	CRK	0.606597268	0.36814977	0.999485199	0.049764229
173	NNMT	0.707825287	0.561801322	0.891803949	0.003375128
174	PRPF3	1.854811805	1.139073819	3.020284353	0.01301295
175	TOMM40	1.668325598	1.138909907	2.443837114	0.008594568
176	BCR	1.627985588	1.14438402	2.315950791	0.006730442
177	EHMT2	1.369178435	1.016203424	1.844758187	0.038863241
178	ITGAV	0.611439369	0.464922721	0.804129558	0.000432149
179	SEC24C	1.485321389	1.007840085	2.189017544	0.045561686
180	TCOF1	1.515921418	1.005419341	2.28563113	0.047059788
181	KLF10	0.5648944	0.372462883	0.856744921	0.007197868
182	TENT4A	1.898299821	1.23735642	2.912291197	0.003332207
183	HCFC1	1.477560565	1.015682551	2.149475957	0.041217997
184	PPP2R5D	1.588252263	1.021769444	2.468800832	0.039815697
185	VAMP8	0.617806124	0.387969145	0.983800935	0.042482241
186	GSTM3	0.627346789	0.437381684	0.899818187	0.011290453
187	SLC30A9	0.504557133	0.284767646	0.893984637	0.01908039
188	RNMT	1.82930514	1.165935044	2.87010611	0.008588386
189	STK17A	0.726310601	0.538092225	0.980365566	0.036659274
190	TMEM63A	1.652414658	1.080857437	2.526211237	0.020396106
191	IFNGR1	0.688141398	0.490308916	0.965796393	0.030679794
192	GET1	0.645122006	0.425872483	0.977246524	0.038584837
193	FBN1	0.661810649	0.514480809	0.851330756	0.001314943
194	CCNG2	0.564751016	0.395529336	0.806371818	0.001664984
195	PPP6R2	2.399842709	1.370524175	4.202220678	0.002193449
196	INTS3	1.70006002	1.167965945	2.474561936	0.005595371
197	OGFR	1.498822908	1.05063484	2.138202566	0.025584996
198	RALBP1	2.073466608	1.189311967	3.614916771	0.010131782
199	MAP7	0.806119978	0.704337848	0.922610394	0.001750415
200	BTBD3	0.715826897	0.539523147	0.949742655	0.020482333
201	KIF13B	1.564510616	1.072360323	2.282528936	0.020206963
202	BAHD1	1.604375378	1.073819535	2.397069778	0.021019698
203	BCAS2	0.611699698	0.386820427	0.967313242	0.035545076
204	MDC1	1.592583365	1.003545755	2.527360372	0.04826978
205	FOXK2	1.704038511	1.160069919	2.503079514	0.006591806
206	KLHL21	1.275849434	1.008902212	1.613428693	0.041955503
207	HAT1	0.66776226	0.458479408	0.972576801	0.03529982
208	AP3B1	1.739094347	1.200875911	2.518535945	0.003402705
209	SETDB1	1.430779138	1.019918829	2.007148887	0.038064028
210	RNF8	1.650859089	1.105313527	2.465667582	0.014318973
211	ARFRP1	1.512291146	1.002737614	2.280780614	0.048495035
212	GALT	1.821144432	1.036700231	3.199157233	0.03703797
213	ABCC4	0.69924974	0.501838245	0.974318327	0.034542466
214	CDK9	1.494878723	1.035499671	2.158052252	0.031858558
215	CLK2	1.584035883	1.095019914	2.291437485	0.014612548
216	LGALS9	1.370659728	1.048160856	1.792385281	0.021243258
217	TLN1	1.247193578	1.042353253	1.492288546	0.015817074
218	DRAP1	1.527744132	1.003808509	2.325146791	0.047962185
219	FAM50A	1.820139026	1.171634692	2.827593017	0.007705034
220	TUSC2	1.897737368	1.224830342	2.940331401	0.004133957
221	GBE1	0.590877968	0.405968941	0.860008581	0.006005164
222	JARID2	1.831184435	1.198919529	2.796881986	0.005118212
223	DCK	0.6688995	0.492669703	0.908167355	0.009955805
224	GTPBP6	1.518535635	1.039666284	2.217971776	0.030678962
225	ZNF148	0.718395591	0.518490272	0.995374945	0.046830873
226	ITGB1BP1	0.597180344	0.393841686	0.905501821	0.015209683
227	MTF2	0.540112986	0.337567151	0.864189647	0.01021009
228	CAPN7	0.55528652	0.33275532	0.926636183	0.024347812
229	CRELD1	1.786204284	1.089302559	2.928961949	0.02150739
230	DGKA	1.374309101	1.008240914	1.873287901	0.044230876
231	HES1	0.663506218	0.508560715	0.865659671	0.0025018
232	KCNAB2	1.501580494	1.048951192	2.1495223	0.026345775
233	RNF6	0.685865316	0.475502444	0.989292984	0.043636945
234	LZTR1	1.606576485	1.058573322	2.438270404	0.025921296
235	KMT2B	1.602853073	1.083756222	2.370586596	0.018138081
236	ASF1A	0.701987986	0.50233268	0.980997559	0.038235008
237	EML3	1.27551287	1.009044168	1.612350712	0.041824147
238	CEP57	0.614355748	0.386389336	0.976820401	0.039485943
239	MPST	1.748828632	1.074843285	2.84543954	0.024412594
240	AOC1	0.810273988	0.67035633	0.979395444	0.029613059
241	FANCG	1.855982884	1.14699996	3.003201906	0.011785237
242	PLXNA3	1.303697312	1.00685501	1.688055047	0.044242362
243	CPT1A	1.865704988	1.316405345	2.644212221	0.000456624
244	ERF	1.483022886	1.042174449	2.110353869	0.028562435
245	NUCB2	0.699076867	0.488854678	0.999700907	0.049808713
246	FRZB	0.710915198	0.549084433	0.920442083	0.009625209
247	LLGL2	1.504678083	1.010462006	2.240614808	0.044304887
248	PNPLA6	1.361521629	1.020361912	1.81674867	0.035999618
249	SKIV2L	1.331570718	1.005113905	1.764059344	0.045987318
250	POLRMT	1.424890479	1.004188105	2.021845177	0.047325712
251	SSBP2	0.773458092	0.643225393	0.930058773	0.006319307
252	GUCY1B1	0.679475974	0.502357249	0.919042375	0.012146949
253	BLZF1	0.684740431	0.503187864	0.931798025	0.015980235
254	TUBG2	1.504133879	1.083214424	2.088615767	0.014801915
255	LYRM1	0.633641361	0.443309516	0.905690855	0.012298192
256	CXADR	0.797039161	0.651496678	0.975095417	0.027446018
257	MPO	1.250159674	1.000441432	1.5622096	0.049547969
258	MORC2	1.534709958	1.035620847	2.2743214	0.03281251
259	SLC31A1	0.774782097	0.606996144	0.988947463	0.040440844
260	F2R	0.735172237	0.602686864	0.896781148	0.002409053
261	SPRY2	0.775703833	0.607163843	0.99102811	0.04214658
262	P3H4	0.808731815	0.673949887	0.970468518	0.022475873
263	PDE6D	0.654016934	0.434470056	0.984505479	0.041871483
264	HNMT	0.779489417	0.608062919	0.99924487	0.049307226
265	RRP9	1.379186504	1.068587177	1.780065729	0.013529094
266	IQCE	1.528857543	1.020944473	2.289453979	0.039343498
267	GULP1	0.705703944	0.564658818	0.881980484	0.002184929
268	CPT2	0.632860634	0.405037792	0.988827684	0.04450452
269	CHKA	1.357098553	1.046009563	1.760707118	0.021528837
270	CAPN15	1.508426156	1.061850024	2.142816232	0.021731992
271	SKAP2	0.699866618	0.509933455	0.960543533	0.027162981
272	NAT9	2.346873956	1.334933421	4.12591166	0.003041632
273	EML2	1.749833521	1.072303905	2.855456681	0.025132396
274	RHBDD3	1.629413151	1.06592194	2.490789539	0.024145614
275	GSTM2	1.491537479	1.09611921	2.029600458	0.010961546
276	GAS1	0.740985316	0.582255162	0.942987327	0.014800403
277	GEM	0.684669079	0.499839628	0.937844303	0.018290152
278	ENO3	1.424006781	1.059660373	1.913627577	0.019063601
279	PPIC	0.689239792	0.519182634	0.914998807	0.010039545
280	BRD1	1.641174651	1.011182772	2.663667053	0.04496622
281	TOX	0.770020591	0.660802894	0.89728982	0.0008121
282	NPIPA1	1.290182778	1.02253019	1.627894821	0.031731123
283	ST6GALNAC2	0.774555213	0.602334773	0.996017174	0.046473463
284	IRF4	1.248926084	1.048587343	1.487540711	0.012709354
285	COX7A1	0.756038114	0.576981058	0.99066273	0.042561096
286	CCDC85B	1.524287563	1.047144122	2.218846981	0.027775774
287	PPP2R5B	1.50660635	1.019395776	2.226674611	0.039749311
288	PARVB	1.533002017	1.153363907	2.037600769	0.003252881
289	HOMER3	1.428442966	1.092103676	1.868365936	0.009236937
290	TROAP	1.401288551	1.058341833	1.855364252	0.01847758
291	ICAM2	1.619926234	1.051087675	2.496614759	0.028835371
292	INPP5E	1.703223758	1.022028738	2.838443834	0.04099479
293	SLC29A2	1.35675471	1.068718913	1.722420479	0.012216756
294	CDH13	0.69728733	0.577267545	0.842260446	0.00018315
295	TRIM23	0.775221001	0.615780087	0.975945168	0.030217915
296	C2CD2L	1.350975182	1.006242079	1.813811984	0.045353318
297	PPOX	1.741014371	1.076496768	2.815736313	0.023791722
298	TRIM21	1.418336209	1.023849955	1.964816809	0.035578891
299	NAIP	0.697352901	0.495107345	0.982213398	0.039145019
300	TNFRSF11B	0.633412217	0.505732658	0.793326337	7.02E-05
301	PLN	0.827666227	0.716283005	0.95636973	0.010320317
302	ADGRB2	1.388316282	1.036068422	1.860323178	0.028001622
303	SH3BGR	0.742494603	0.605513379	0.91046417	0.004217214
304	NMT2	0.769677316	0.594510992	0.996454529	0.046931077
305	FGFBP1	1.323725163	1.013962947	1.728118679	0.039216146
306	MAP3K8	0.669603144	0.52451341	0.854827279	0.001287169
307	CCNE2	0.644851664	0.449676269	0.924740078	0.017062337
308	CTDP1	1.543662611	1.024418404	2.326094736	0.037960399
309	PARG	1.82063811	1.067398015	3.105423733	0.027851283
310	ENPP1	0.712847711	0.587641227	0.864731465	0.000593133
311	ING3	0.685020386	0.4693355	0.999824069	0.049893493
312	POM121	1.622273257	1.155872251	2.276869712	0.00514956
313	FGF13	0.756628334	0.620631183	0.922426154	0.005802695
314	SPTBN2	1.288911983	1.050349913	1.581657771	0.015083492
315	CD58	0.700757797	0.549841484	0.893096472	0.00405777
316	QPCT	0.691010219	0.563908192	0.846760394	0.000365423
317	ZSCAN9	1.404453716	1.054549067	1.870458475	0.020164631
318	SPINK5	1.220156749	1.007325562	1.477955637	0.041891538
319	PCMT1	0.671270918	0.460445459	0.978627622	0.038238719
320	SLC16A4	0.742721636	0.614211308	0.89811995	0.002151396
321	TRMT2B	1.357826379	1.015025247	1.816400609	0.039358394
322	ZBTB39	1.617085734	1.009641725	2.589994257	0.045512015
323	RCE1	1.679552267	1.145507431	2.462573127	0.007913621
324	SPA17	0.55907979	0.388650299	0.804245391	0.00172302
325	ATXN3	0.613216145	0.377918181	0.995014421	0.047680837
326	SNAPC1	0.698522801	0.531285523	0.918402785	0.010182395
327	MC1R	1.381675765	1.033506806	1.847136282	0.029076485
328	HS3ST1	0.843297368	0.714060827	0.995924189	0.044634411
329	CASP10	1.671808038	1.12219181	2.490609976	0.011510809
330	IRF5	1.527944938	1.107463104	2.108075406	0.009835888
331	PLAU	0.713606942	0.518933315	0.981310801	0.037890264
332	PAGE4	1.276280591	1.016618336	1.602265165	0.035555213
333	CHST1	0.676932622	0.510567532	0.897506689	0.006700084
334	C1QL1	1.485716562	1.088875893	2.027185758	0.012525101
335	NOS3	1.283550959	1.036344626	1.589725101	0.022193869
336	SH3GL3	1.3431703	1.0148232	1.777754445	0.039127262
337	SNAPC4	1.514637301	1.122810178	2.043200354	0.00655982
338	F12	1.322157734	1.072257002	1.63030045	0.00898418
339	SLC3A1	0.678245959	0.480338491	0.957694604	0.027417507
340	PCSK1	0.802542011	0.690019145	0.933414217	0.004317589
341	ZNF74	1.557711462	1.144091657	2.120865916	0.00487955
342	SLC38A3	1.360370328	1.075845061	1.720143074	0.010152255
343	NMU	0.883626807	0.780822853	0.999966037	0.049937123
344	RNH1	1.521722801	1.087671458	2.128988738	0.014267008
345	EPHA3	0.839281794	0.73021424	0.96464009	0.01363177
346	CPA2	1.64208248	1.036308739	2.601960951	0.034701334
347	PAX2	1.54630703	1.090328923	2.192976247	0.014481795
348	CCDC9	1.660028026	1.021661742	2.697265576	0.040707607
349	LEFTY1	1.266510215	1.005277034	1.595627943	0.045003701
350	FAM155B	1.273656267	1.007507777	1.610111925	0.043124364
351	SPINK2	0.856081034	0.760315145	0.963909164	0.010250566
352	KNTC1	1.660820237	1.156360387	2.385349661	0.006024212
353	SERPINA6	1.386100265	1.056959913	1.817735869	0.018251879
354	CALCRL	0.733039768	0.568617908	0.945005942	0.016554771
355	CCR7	1.423359197	1.135632536	1.783984995	0.002185183
356	CDX1	0.656201165	0.490529892	0.877826155	0.004544388
357	CD70	1.350763535	1.103596124	1.653287909	0.003546035
358	THUMPD1	0.700368063	0.495243609	0.990452807	0.043986655
359	AP3D1	2.50698911	1.328910788	4.729432896	0.004539154
360	RENBP	1.431663851	1.105237818	1.854498052	0.006571395
361	HTR2B	0.835016599	0.714567434	0.975768958	0.023292939
362	TNFRSF17	0.868494489	0.770316642	0.979185228	0.021243077
363	IL7	0.811175233	0.681073713	0.966129283	0.018961153
364	TFEC	0.682803354	0.49936071	0.933634566	0.01684219
365	ASGR1	1.291433755	1.030138829	1.619006192	0.026595015
366	CRYBB2	1.335080619	1.033448412	1.724750108	0.026982559
367	CD3G	0.794176754	0.653633293	0.964939706	0.020388147
368	ADRB3	1.337283489	1.042948849	1.71468345	0.021933412
369	HBD	1.251237022	1.087190823	1.440036148	0.001772964
370	TBX19	1.503875603	1.000859672	2.259699228	0.049518475
371	MATN1	1.276063521	1.003909838	1.621996366	0.046387768
372	CPNE1	1.812484789	1.309406676	2.508847078	0.000337013
373	HGFAC	0.72568672	0.531655607	0.990530727	0.04339362
374	CSRP2	0.627181479	0.452848778	0.86862685	0.004991769
375	CRISP1	1.349331799	1.071155643	1.699749531	0.010974474
376	SLC16A7	0.857565687	0.751781011	0.978235545	0.02216329
377	AOC2	1.602959935	1.164834462	2.205876146	0.003772047
378	SMAD6	0.816497564	0.677358383	0.98421794	0.03343222
379	PI4KA	1.671637262	1.003158626	2.785572552	0.048601817
380	ADGRE1	1.281195963	1.011629571	1.622593033	0.039792601
381	MATN4	1.281380536	1.029313804	1.595175418	0.026521751
382	CDH11	0.641960959	0.495850847	0.831124672	0.000768758
383	CEACAM4	1.612153813	1.090964843	2.382331505	0.016533041
384	RFPL2	1.476060391	1.072633456	2.031219767	0.016829247
385	DSCR4	1.385516648	1.055359968	1.818958877	0.018877012
386	FEV	1.484566221	1.156152446	1.906268394	0.001952296
387	AKAP3	1.537888031	1.079450594	2.191021627	0.017158146
388	CCL16	1.372230923	1.116334624	1.686786082	0.002655245
389	PIP5K1A	1.894581096	1.175510983	3.053512542	0.008690861
390	ALG3	2.379629821	1.311513975	4.317634576	0.004343009
391	RAD17	0.604968459	0.395062969	0.92640127	0.020800788
392	TP53TG5	1.308769429	1.011479969	1.693436816	0.040678916
393	LAIR2	0.767858869	0.596440537	0.988543209	0.040426645
394	NFKB2	1.347215452	1.053159105	1.72337633	0.017681791
395	RPL36AL	0.566136935	0.339479276	0.944125467	0.029234423
396	ABCG4	1.408331579	1.009380111	1.964966235	0.04391466
397	ADAM18	1.250403355	1.002239052	1.560015594	0.047728424
398	ARTN	1.362538597	1.028298871	1.805420078	0.031216703
399	TBX6	1.382071377	1.004060312	1.902396964	0.047164613
400	ATP6AP1	1.562246154	1.033019328	2.362601529	0.034524367
401	FDXR	1.44592847	1.05430403	1.983022999	0.022132435
402	IL13	1.290919195	1.010210471	1.64962888	0.041234215
403	NUDT13	1.419289241	1.020635459	1.97365468	0.03739955
404	CCL27	1.239154019	1.013258684	1.515410336	0.036776511
405	ZNF442	0.794830149	0.641265785	0.985168679	0.03604842
406	VOPP1	1.575603096	1.00080232	2.480534932	0.049596516
407	URM1	1.73504564	1.038076927	2.899961742	0.035504722
408	PTGIS	0.822918202	0.724306423	0.934955628	0.002765287
409	ZNF205.AS1	1.285295979	1.011485041	1.633228062	0.040034782
410	DOHH	1.616126213	1.047900772	2.492472576	0.029883286
411	DDX11	1.375807144	1.058422647	1.78836432	0.017111734
412	ABCC3	0.783402199	0.629106543	0.975540649	0.029165822
413	PTPRH	1.425244664	1.073533613	1.89218328	0.014257608
414	PDE1A	0.783963901	0.651413895	0.943485245	0.010007679
415	H1.1	0.776459724	0.613958073	0.981972108	0.034702676
416	ANP32C	1.29094136	1.079558185	1.543714473	0.005125879
417	LILRA6	1.52165648	1.141226798	2.028902972	0.004237235
418	EIF4G1	1.460226321	1.104333313	1.930812811	0.007901237
419	SERINC1	0.718746229	0.539495596	0.957553955	0.024052087
420	DDOST	0.551186293	0.319311931	0.951440581	0.032461399
421	BSG	1.652247362	1.131875868	2.411855772	0.009272721
422	EIF3B	1.640009047	1.060452414	2.536303976	0.026160794
423	RAB2A	0.576494587	0.395140839	0.841082409	0.004263455
424	ATP6V1G1	0.681251101	0.466863605	0.994087046	0.046511368
425	NCSTN	1.960256758	1.236565015	3.107484453	0.004193329
426	EIF4EBP2	1.681539815	1.038338645	2.723173371	0.034607709
427	PSMD11	1.651326672	1.111028137	2.454375084	0.013113181
428	CD46	0.597266672	0.380234433	0.938177731	0.025290093
429	MAP1LC3B	0.598507269	0.376490335	0.951447932	0.029976362
430	GOLGA8A	1.250308179	1.029476526	1.51851014	0.024262614
431	CDK16	1.56365841	1.113063735	2.196664526	0.009948711
432	G3BP2	0.534521649	0.31031627	0.92071677	0.023964876
433	PTPA	1.51736443	1.047762139	2.197440361	0.027320987
434	SLC1A5	1.600422494	1.154474213	2.218630899	0.004773494
435	NXF1	1.708274958	1.088273896	2.681497136	0.019929215
436	POR	1.721504839	1.133445306	2.614664241	0.010853066
437	SEC62	0.704508341	0.522181308	0.950497452	0.021892724
438	LGALS3	0.71275456	0.520246815	0.976496247	0.035028304
439	STAG2	0.621899225	0.406338284	0.95181444	0.028713642
440	RGS5	0.611851315	0.464426364	0.80607403	0.000478331
441	TUBA1A	0.675251895	0.501158372	0.909822418	0.009845938
442	PIM1	1.367850603	1.118513426	1.672769614	0.002282438
443	WDR46	1.795468369	1.098301296	2.935175145	0.019602509
444	SYT11	0.696603866	0.525580156	0.923278667	0.011892339
445	MEF2C	0.682613089	0.541302779	0.860813296	0.001253473
446	FERMT2	0.621700027	0.4563761	0.846913155	0.002583319
447	MFSD10	1.555584533	1.098027427	2.203809468	0.012913654
448	OGT	1.742553344	1.114152033	2.725384027	0.014947461
449	DEGS1	0.690646346	0.530278018	0.899513761	0.006041695
450	ID4	0.786784951	0.620975624	0.996867728	0.047039418
451	ULK1	1.38947611	1.092028356	1.767942975	0.007444836
452	PWP2	1.886897888	1.228981772	2.897019077	0.003701791
453	PCBP4	1.660746379	1.158005301	2.38174949	0.005826569
454	ANXA3	0.815207155	0.691109759	0.96158779	0.015315304
455	SH3BP2	1.591181881	1.016439608	2.490910191	0.042227215
456	ABCC5	1.683533252	1.085169426	2.611835666	0.020085215
457	ENPP2	0.705224905	0.536797593	0.926498504	0.012132531
458	B4GALT2	1.869787435	1.264686245	2.764405057	0.001706492
459	FZR1	1.487069626	1.071300935	2.064196902	0.017711151
460	SPON1	0.773327797	0.618547846	0.966838515	0.024075076
461	DUSP5	1.41639946	1.135851735	1.766240584	0.001994649
462	HSDL2	0.663480586	0.450937424	0.976203047	0.037323948
463	SMARCD1	1.503958006	1.013734612	2.231244409	0.042586458
464	IGF1	0.733810176	0.584087518	0.921912142	0.007854045
465	RRS1	1.552941109	1.055373552	2.285092405	0.025519922
466	PCYT2	2.103266029	1.358473029	3.256397364	0.000857302
467	MBD4	0.689634171	0.483422846	0.983808057	0.040362148
468	PRUNE1	1.978216067	1.148316041	3.407893534	0.013958803
469	PDLIM3	0.689300533	0.570906407	0.832247141	0.000108954
470	MCCC2	1.814903553	1.124719974	2.928617773	0.014630752
471	PPP2R3A	0.743047659	0.599515955	0.92094267	0.006687623
472	STAM2	0.661734217	0.474842875	0.922183309	0.014752958
473	TMEM47	0.593574157	0.443214374	0.79494326	0.000465714
474	CRY1	0.734507268	0.573139296	0.941308563	0.014775347
475	PTS	0.665327254	0.452298025	0.978691772	0.038513608
476	PTP4A3	1.305151103	1.025570224	1.660948575	0.03036906
477	PHTF2	0.547367862	0.366523932	0.817440689	0.003228826
478	SLC9A3R2	1.320333483	1.085918246	1.605351518	0.005328191
479	FRAT2	1.697331424	1.079249428	2.669386603	0.022016095
480	TADA2A	2.485460614	1.382039637	4.469853324	0.00236182
481	CREM	0.700654743	0.547246531	0.897067485	0.004779946
482	CCNO	1.295097138	1.052762291	1.593214927	0.014428641
483	CTSZ	0.824427413	0.68784143	0.988135535	0.036697497
484	IGFBP3	0.661967792	0.540207035	0.811172992	6.95E-05
485	SND1.IT1	1.362210885	1.013235897	1.831378556	0.04065393
486	BANF1	1.879768013	1.140627475	3.097880648	0.013279421
487	LAMA5	1.477162514	1.053004488	2.072174543	0.02388139
488	EIF6	2.167410745	1.240294197	3.787544398	0.006605167
489	B4GALT3	1.75675175	1.061039311	2.908635598	0.028504462
490	MADD	1.459989678	1.067031226	1.997663992	0.018004586
491	RGS13	0.880526304	0.806105689	0.961817516	0.004742201
492	L3MBTL1	1.461188165	1.090722155	1.957483714	0.01102092
493	PCDHGA8	0.824655759	0.682522267	0.996388182	0.045775984
494	KCNJ6	1.312531516	1.037912765	1.659810957	0.023167819
495	ADH7	1.395550998	1.064254221	1.829978729	0.015938192
496	PRB1	1.399091338	1.084911373	1.804254818	0.009652543
497	BCKDHB	0.528698474	0.343842942	0.812935333	0.003690849
498	THEMIS2	1.545748179	1.108283542	2.155890025	0.010298299
499	OASL	1.507050406	1.062082545	2.138441062	0.02159998
500	POSTN	0.806592877	0.710398862	0.915812375	0.000909043
501	CALCOCO2	1.740403468	1.03852918	2.916628911	0.035424107
502	PLPP1	0.616030057	0.407355293	0.931602063	0.021693214
503	TPM1	0.534633879	0.405403773	0.705058522	9.19E-06
504	LILRA2	1.40162885	1.021402484	1.923397939	0.036517284
505	FAM153A	1.26272432	1.012041212	1.575501757	0.038831306
506	GPR45	0.704233501	0.534335796	0.928151975	0.012800468
507	USH1C	1.293851417	1.009417527	1.658433151	0.041954761
508	GALR2	1.282215952	1.058556328	1.553132037	0.011027463
509	PTBP1	1.938139793	1.171800345	3.205653483	0.009951846
510	HOPX	0.789835473	0.677609751	0.920648018	0.002550107
511	ARHGDIA	1.499722624	1.008565131	2.230067131	0.045274429
512	FN1	0.77560641	0.654201592	0.919541178	0.003436447
513	FCER1A	0.789693083	0.66202217	0.94198532	0.008684773
514	GANAB	1.335413934	1.030581785	1.73041131	0.028682889
515	SMARCE1	0.562074341	0.348900402	0.905494989	0.017884379
516	FAM168B	1.451714171	1.015345454	2.075622661	0.041007773
517	VDAC1	1.856498359	1.079931726	3.191485236	0.025211592
518	TBC1D9B	1.691318965	1.060386579	2.697657531	0.027376273
519	TRPC4AP	1.667026285	1.080997541	2.57075204	0.020756898
520	CALD1	0.66961083	0.518487366	0.864782234	0.002117928
521	ERAL1	1.682407579	1.008048349	2.807896331	0.046520741
522	GRINA	1.217928994	1.010603637	1.467787152	0.038382059
523	POLDIP3	1.786760355	1.008581481	3.165349184	0.046673585
524	STX12	0.51471876	0.301016369	0.880136193	0.015247644
525	RANGAP1	1.508286813	1.036185982	2.195483386	0.031909749
526	LSM14A	0.470227054	0.281535901	0.7853829	0.003938607
527	GCN1	1.695071545	1.033257796	2.78078477	0.036662339
528	SDC2	0.685211286	0.531898172	0.882715022	0.003440567
529	AP2A2	1.878363507	1.092031419	3.230904718	0.022719534
530	XPO7	1.664486008	1.029439597	2.691283372	0.037680424
531	KCTD12	0.672671938	0.466235028	0.970513817	0.034006747
532	TM9SF4	2.172986744	1.184844834	3.985223427	0.012138592
533	INTS1	1.804990602	1.143454271	2.849253491	0.011228175
534	FASN	1.424611632	1.101563582	1.842397785	0.006992972
535	PIK3R1	0.532667179	0.341176099	0.831635994	0.005587485
536	MCFD2	0.477119893	0.300706036	0.757029673	0.001679312
537	AGRN	1.281678702	1.004356655	1.635574659	0.04605284
538	CREB3L2	1.638047966	1.191385932	2.252167889	0.002381792
539	EP400	1.555581409	1.029031524	2.351564034	0.036108799
540	CMTR1	1.639066115	1.064957878	2.522670412	0.024701847
541	ATP6V0A1	1.388862288	1.038571825	1.857299041	0.026747181
542	TOR1AIP1	0.626167561	0.402281407	0.974655571	0.038109249
543	ELF1	0.596849599	0.398766552	0.893328294	0.012135766
544	PDCD11	1.624402456	1.1128439	2.371117224	0.011936252
545	SNRNP27	0.473605948	0.254848935	0.880139421	0.018090211
546	CDC34	1.862079061	1.220691699	2.840470228	0.003907342
547	RPRD2	1.589752397	1.049498969	2.408113545	0.028670298
548	AUTS2	0.806353154	0.650592479	0.999405051	0.049368149
549	MRPS31	0.478149722	0.289922475	0.788580315	0.003846886
550	DTX4	1.439622129	1.057879402	1.959119224	0.020455676
551	CHN1	0.751851134	0.570525092	0.990806777	0.042810469
552	EXOC3	1.79559035	1.084917431	2.971788096	0.022784752
553	MAPK1IP1L	0.537159845	0.318256991	0.906627999	0.019965101
554	TUBB4A	1.309351177	1.074363225	1.5957364	0.007569505
555	MDN1	1.600528476	1.091645485	2.346633076	0.015991814
556	SEPTIN10	0.779230574	0.623471551	0.973902156	0.028351926
557	MSL1	1.665970068	1.069127435	2.596001352	0.024113246
558	TOMM20	0.637943261	0.440052386	0.924825357	0.017671467
559	NCAPD3	1.652457254	1.049341196	2.602218406	0.030170837
560	SERINC5	0.689487527	0.512372207	0.927827549	0.01410895
561	PAXIP1	1.783221194	1.059601371	3.001013321	0.02940979
562	CKAP5	1.608961639	1.015527837	2.549174393	0.042806746
563	COL14A1	0.768223178	0.646870139	0.912342086	0.002649232
564	SEC23A	0.706156902	0.499059882	0.999193859	0.049470086
565	ZNF282	1.517736077	1.094216888	2.105179353	0.012442534
566	TTI1	2.068010368	1.177569491	3.631774527	0.011443586
567	PHF8	1.530484153	1.058685313	2.212538243	0.023621184
568	TCF20	1.852956211	1.054291479	3.256638976	0.032055502
569	CAMTA2	1.840464272	1.165771174	2.905637753	0.008836595
570	CALR	1.706882012	1.109684382	2.625472838	0.014945642
571	HIC2	1.973281468	1.147003682	3.394792723	0.014071434
572	ZDHHC17	1.532915806	1.001277728	2.346832255	0.049317058
573	ATF2	0.532987602	0.34886228	0.81429206	0.003614223
574	PABPN1	1.314666159	1.008649108	1.713526633	0.043004578
575	ZFC3H1	1.589152285	1.08852173	2.320031759	0.016425357
576	SS18L1	1.887635595	1.163113725	3.063473558	0.010124018
577	ROBO1	0.656108571	0.511732833	0.841217193	0.00088873
578	TNNT1	0.721176684	0.534444151	0.973152778	0.032519693
579	OTUD3	1.501318907	1.11596987	2.019730569	0.007253379
580	PIBF1	0.569999297	0.372120876	0.873101241	0.009774463
581	ADCY1	1.317109425	1.025729625	1.691261706	0.030842329
582	SRC	1.240004756	1.044508065	1.472091835	0.013993782
583	STIP1	2.12068805	1.399250318	3.214090963	0.000394914
584	PLCB3	1.726575939	1.036684284	2.875576023	0.035870779
585	NPHP4	1.830085997	1.217744639	2.750342436	0.00363978
586	PLPPR4	0.747867183	0.616588273	0.907096922	0.003177335
587	CCNE1	1.752299217	1.223840751	2.508947788	0.002191643
588	CD3D	0.807171823	0.657232313	0.991318199	0.041039677
589	SERPINB1	0.626511867	0.451155983	0.870025299	0.005253699
590	COL9A2	1.316577579	1.035052315	1.674675276	0.025049791
591	TRMU	2.141317418	1.268845978	3.613709122	0.004347951
592	IRF2BP1	1.434288403	1.101700207	1.867280417	0.007372573
593	EBP	1.596645268	1.107419892	2.301995956	0.012191548
594	RTEL1	1.730801526	1.100581556	2.721900896	0.017555819
595	CLMN	1.546956305	1.113242896	2.149642109	0.009348827
596	CSNK1A1	0.451142056	0.237865054	0.85564967	0.014796472
597	LRRC15	0.708575761	0.580530527	0.864863406	0.000704991
598	TWIST1	0.63574955	0.449984961	0.898202217	0.010203952
599	LYZ	0.377159967	0.239333816	0.594356629	2.65E-05
600	DMAC2L	0.686054261	0.494561328	0.951692788	0.024040915
601	MEIS3P1	0.59851965	0.420104471	0.852706399	0.004479227
602	RPS8	0.727430002	0.55927292	0.946147023	0.017658927
603	SUGP2	1.463844443	1.008290121	2.125222203	0.045137833
604	NSUN5P1	1.659870235	1.131754106	2.434423857	0.00950359
605	POLR2C	0.540058099	0.312371552	0.933704586	0.027416826
606	SEPTIN7P11	1.319620698	1.07145613	1.625263731	0.009072697
607	AMBP	1.223102666	1.005588728	1.48766597	0.043826484
608	MTMR6	0.680749661	0.481947976	0.961556277	0.029076883
609	NAT1	0.560740222	0.370290921	0.849142065	0.006288686
610	H1.5	0.87594671	0.777859268	0.9864029	0.028822561
611	ITGA1	0.751669752	0.610702934	0.925175538	0.007061996
612	ZNF394	0.512320676	0.293959705	0.892885899	0.01828968
613	NOTCH2NLA	1.363352727	1.025320933	1.812828158	0.033009716
614	UAP1L1	1.421215526	1.011247194	1.997388553	0.04293153
615	TOR1AIP2	0.614037161	0.387962711	0.971850192	0.037356065
616	ZNF33B	0.546372365	0.333998491	0.893784761	0.016077927
617	IGLV6.57	0.808900636	0.661558038	0.989059464	0.038716073
618	COL3A1	0.817375899	0.692577883	0.964661705	0.017052262
619	N4BP2L2.IT2	1.296978654	1.018165882	1.65214103	0.035226187
620	GSTM1	1.479030857	1.087298714	2.011896316	0.012663213
621	KHDRBS2	1.413787308	1.122800531	1.780186682	0.00322877
622	ZNF492	0.783207896	0.638291534	0.961025763	0.019243398
623	SCFD1	0.398326512	0.221044333	0.717792707	0.002187742
624	FBXW12	1.445045252	1.021915675	2.043373863	0.037287346
625	PHF7	1.64349649	1.066589331	2.532446774	0.024309648
626	RASGRF1	1.486213001	1.128712578	1.956945574	0.004766271
627	DNAJC11	1.970217394	1.271478051	3.052948163	0.002406863
628	DNAH2	1.316045129	1.044880437	1.657581785	0.019653344
629	UBQLN2	0.615969573	0.396152293	0.95775923	0.031428535
630	MED25	1.281277402	1.016902668	1.614384378	0.035542747
631	SNRNP40	1.451540616	1.067689722	1.973391817	0.017409683
632	CYP2C9	1.409179386	1.087108173	1.826668764	0.009574776
633	POLE	1.47134785	1.025564861	2.110899639	0.035989824
634	CYP2C19	1.374844328	1.010948372	1.869726466	0.04241969
635	SLC7A8	1.661627018	1.08601817	2.542318743	0.019270296
636	XRCC3	1.441316602	1.107406265	1.875909151	0.006553745
637	JRK	1.611001988	1.05794835	2.453170238	0.026248759
638	MST1	1.332624393	1.023234494	1.735562847	0.033141183
639	ITGA7	1.283542149	1.048267156	1.57162269	0.015681589
640	BAIAP3	1.230057719	1.00727208	1.502118466	0.042251261
641	PRODH2	1.241452911	1.009280584	1.527033567	0.040617609
642	TP53I11	1.426119565	1.058268535	1.921834531	0.019698239
643	ELK2AP	1.633682536	1.177330899	2.266923117	0.003317308
644	PTGER4P2.CDK2AP2P2	1.326876793	1.024889099	1.717846377	0.031829145
645	CYB561	1.847370855	1.121021899	3.044346484	0.016031087
646	B3GALT2	0.829852915	0.703863768	0.978393676	0.02642152
647	EDDM3A	1.222258098	1.01598946	1.470403894	0.033322923
648	RAB40A	1.268428377	1.034654182	1.555022514	0.02215299
649	ZNF573	0.755984698	0.593955373	0.962215158	0.023030496
650	SUZ12P1	1.418211105	1.017764094	1.976217032	0.039019592
651	TLE5	1.434295861	1.050906616	1.957552255	0.02303435
652	EIF2AK1	1.870671454	1.147624336	3.049265846	0.011994566
653	GPS1	1.706009139	1.028861461	2.828823213	0.038429974
654	YKT6	1.444795332	1.012340423	2.061987749	0.042606705
655	GALNT2	1.355810964	1.03756842	1.771664726	0.025736696
656	POLDIP2	1.701871499	1.024574115	2.82689808	0.040001755
657	SPG21	2.082113158	1.192804309	3.634456358	0.009872421
658	SLTM	1.84619228	1.015752142	3.355568544	0.044300858
659	HSD17B12	0.603007387	0.396907115	0.916128473	0.017764857
660	ARFGAP1	1.717556209	1.146636207	2.572742176	0.008698586
661	TMEM214	1.45761607	1.008283243	2.107190238	0.045087974
662	STRN4	1.430573813	1.102556993	1.856177456	0.00704537
663	CYRIB	0.544420783	0.319437101	0.927863381	0.025404391
664	ILRUN	1.453274427	1.010965265	2.089099036	0.043501664
665	CNPY3	2.082088345	1.253899936	3.457286944	0.004590584
666	POMGNT1	1.952946074	1.150244038	3.315816679	0.013204131
667	ENOPH1	0.593186529	0.37573321	0.93648964	0.024986772
668	GIT1	1.522833741	1.022903073	2.267099069	0.038312202
669	COPS4	0.522067196	0.285704459	0.953972359	0.034586763
670	PTGES2	1.55086366	1.12876027	2.130813916	0.006785353
671	DERA	0.495779971	0.295835841	0.830858692	0.00773691
672	RETSAT	2.129188709	1.20517203	3.761657625	0.009250236
673	SCAMP2	1.977536959	1.099924569	3.555382371	0.022715728
674	CENPT	1.279107466	1.013763797	1.613902483	0.03796758
675	TSR1	1.548534979	1.08193512	2.216362642	0.016828341
676	MEAF6	2.426427229	1.304761396	4.512356908	0.005104347
677	ARMT1	0.58298253	0.41157013	0.825785461	0.002385432
678	POGK	1.645628055	1.109911138	2.439917578	0.013178254
679	C1QA	1.208011385	1.026763976	1.421253122	0.022702506
680	RMND5B	1.677094992	1.099141881	2.558948633	0.016464627
681	DGLUCY	1.829288105	1.117886311	2.993412601	0.016240595
682	RSAD1	2.161235894	1.301039835	3.590159549	0.002917786
683	LGR4	0.674102764	0.537906569	0.844783393	0.000615384
684	TASOR2	0.578470148	0.406678261	0.822831572	0.002329614
685	TNFRSF12A	0.693139579	0.567138398	0.847134452	0.000342774
686	U2AF2	1.366622759	1.002296175	1.863379121	0.048329173
687	USP16	0.477739621	0.253751254	0.899444406	0.022122706
688	APH1A	1.843350344	1.149346642	2.956410508	0.011165301
689	OAS3	1.384741378	1.056050001	1.815736644	0.018551851
690	SHFL	1.872887609	1.152494144	3.043579885	0.0113134
691	NFS1	1.797402804	1.099330784	2.938748634	0.019413251
692	CAPRIN2	1.486944843	1.063499899	2.078989352	0.020341421
693	POMT1	1.60370155	1.00483073	2.559494433	0.047684659
694	E4F1	1.958741604	1.128834545	3.398787437	0.016805161
695	THTPA	1.661449952	1.014124091	2.721970583	0.043836847
696	TCIM	0.759462697	0.593896722	0.971185	0.028307051
697	ECHDC2	1.619036369	1.084460639	2.417126698	0.018447062
698	SPOUT1	1.69177696	1.057688402	2.706004223	0.028235277
699	REC8	1.379948003	1.017698446	1.871140216	0.038182912
700	LEMD3	0.476927436	0.287055092	0.792390679	0.004258946
701	ATP13A2	1.681102201	1.202719932	2.349761184	0.002363064
702	WASHC3	0.591377775	0.370988608	0.942691137	0.027241996
703	PLEKHF2	0.635407561	0.473878876	0.851995709	0.002443402
704	RAP2C	0.612618241	0.400729098	0.93654569	0.023655485
705	PDGFC	0.675169086	0.514388196	0.886204812	0.004647261
706	LXN	0.611165904	0.45718465	0.817008539	0.000885543
707	CDK5RAP3	1.395466535	1.024128356	1.901448033	0.034772136
708	TAF1D	1.455475277	1.008484026	2.100586849	0.04495278
709	NOL9	1.536109478	1.084878988	2.175018924	0.015559595
710	CEP192	2.191103467	1.422399825	3.375235512	0.000373238
711	DEPTOR	0.687833334	0.515384616	0.917983735	0.011051525
712	ATAT1	1.298973696	1.033132452	1.633220078	0.025158075
713	TRMT11	0.659004273	0.444912169	0.976117674	0.037474201
714	MTHFSD	1.451613318	1.031980006	2.041881831	0.032290713
715	MRPL2	1.954227534	1.273075398	2.999826451	0.002182969
716	CCDC59	0.645353979	0.423925975	0.982439819	0.041092965
717	PLCXD1	1.445197889	1.059491092	1.971320906	0.020083062
718	PAAF1	1.972106111	1.134582773	3.427870232	0.016057364
719	INAVA	1.430315005	1.05848633	1.93276092	0.019805619
720	CSGALNACT1	0.747836654	0.561784747	0.995505243	0.046499692
721	ASPN	0.809568582	0.704409399	0.930426666	0.00292282
722	MYBBP1A	1.660386688	1.03825005	2.655317912	0.034288798
723	SPAG16	0.679397403	0.497586363	0.927639632	0.01498815
724	NMRK1	0.562282864	0.377300492	0.837958142	0.004677308
725	TMEM120B	1.370129083	1.05687587	1.776229127	0.017424502
726	IFT74	0.751627825	0.601226223	0.939653604	0.012197809
727	FBXL6	1.494132989	1.076837818	2.073137988	0.016262298
728	SSH3	1.701319205	1.163665664	2.487387164	0.006104587
729	SH3TC1	1.386464347	1.080181849	1.779592379	0.010301243
730	ETNK2	1.268965986	1.000592364	1.60932137	0.049431746
731	CAAP1	0.616015312	0.407153772	0.93201854	0.021836515
732	CAPN10	1.278425954	1.013897673	1.611970283	0.037833733
733	KLHL26	1.451812976	1.017333472	2.071848589	0.039910406
734	PGGHG	1.235087106	1.002854125	1.521098753	0.046946533
735	AEN	1.326559452	1.053975568	1.669640202	0.016044598
736	CLUHP3	1.496424293	1.019740273	2.195937264	0.039411894
737	BICRA	1.534652908	1.035660867	2.274064438	0.032794012
738	OSGIN1	1.311575454	1.041326548	1.651960352	0.021225344
739	LRFN4	1.265960345	1.029397357	1.556887226	0.025451059
740	ZNF180	0.544748442	0.333550226	0.889673705	0.015222092
741	CLCF1	0.76263863	0.613800922	0.947567298	0.014438948
742	GCNT3	0.683322589	0.533659086	0.87495889	0.002535947
743	DLL3	1.582087839	1.167591141	2.143731518	0.003080709
744	EAF2	0.629690284	0.481397197	0.82366465	0.000735866
745	NME7	0.624807305	0.407135517	0.958855594	0.031379154
746	RAB3IL1	1.405877148	1.038977795	1.90234148	0.027260009
747	TMC5	0.800625277	0.651839659	0.983371946	0.034021686
748	THAP10	0.622372615	0.43090701	0.898912441	0.011468225
749	ZNF767P	1.461290116	1.024115265	2.085086392	0.036497293
750	PARP6	1.722715248	1.059532707	2.800996898	0.028297293
751	PLAC1	1.357339659	1.079537498	1.70662988	0.00892251
752	NOX4	0.821695447	0.691506646	0.976394676	0.02565523
753	SMCO4	0.684217126	0.472438933	0.990928228	0.044623056
754	UCP3	1.250230792	1.002024884	1.559918379	0.047942359
755	FRS3	1.503221389	1.015720081	2.224702048	0.041555029
756	SLC16A10	0.82110444	0.678223799	0.994085583	0.043302501
757	MCOLN1	2.091472089	1.375972348	3.179028638	0.000552439
758	HS3ST3A1	0.736377836	0.583700035	0.928991406	0.009843949
759	RNF220	1.716309568	1.061791528	2.774290863	0.027476921
760	AUNIP	1.971198649	1.175341359	3.305953699	0.010101378
761	PRX	1.275962685	1.045987649	1.556500954	0.016244564
762	IL22RA1	1.601323366	1.187138288	2.160015013	0.002046593
763	STAB2	1.230118444	1.003212484	1.508345849	0.04650358
764	BRD9	1.474217436	1.06872827	2.033554374	0.018030886
765	PLEKHA8P1	0.673909736	0.491794954	0.923462774	0.01407498
766	ABCA11P	0.5992321	0.385168136	0.932265876	0.023147231
767	SLC45A2	1.315161414	1.02591702	1.685954626	0.030627755
768	MAK	0.749019343	0.602949141	0.930476451	0.009027598
769	CCDC81	0.784594756	0.625144516	0.984714599	0.036362342
770	NDST3	1.277326164	1.001312625	1.629423308	0.0487783
771	ARL14	0.863307806	0.752516591	0.990410547	0.035952332
772	RHBG	0.697330019	0.490650067	0.991071209	0.044434301
773	ZNF692	1.353929777	1.000236698	1.832692045	0.049821187
774	FLJ20712	0.658719915	0.457162914	0.949140696	0.025087174
775	ANP32A.IT1	1.305679647	1.009112084	1.689405338	0.042461789
776	PRDM14	1.275331327	1.023628776	1.588925627	0.030146325
777	ZNF580	1.425369297	1.000142276	2.031388614	0.049908075
778	TAOK3	0.528456127	0.322724468	0.865338412	0.011251674
779	DELEC1	1.316389574	1.04826419	1.653096164	0.018001382
780	DPP8	0.434242687	0.232949581	0.809474353	0.008660574
781	ATP1A1	1.687103187	1.071403237	2.656625503	0.023965465
782	PADI1	1.962284215	1.187875583	3.241551048	0.008482588
783	SLC2A10	0.75981967	0.62066106	0.930179076	0.007786116
784	GTPBP2	1.487504334	1.059602614	2.088206575	0.021762898
785	CIDEB	1.550488567	1.112272732	2.16135371	0.009658609
786	QTRT1	2.060446948	1.354830073	3.133560222	0.000725812
787	SYNC	0.604806242	0.456314341	0.801619756	0.000468238
788	OR52A1	1.285346047	1.009102967	1.637210981	0.042015574
789	OR2W1	1.210469212	1.001420911	1.463156697	0.048308682
790	BNIP3L	0.614668539	0.456280405	0.828037779	0.00136888
791	TSPYL1	0.576116274	0.382325227	0.868135133	0.008391747
792	STX16	1.686667694	1.159645833	2.4532041	0.006241076
793	TNPO2	1.539328897	1.02123014	2.320273717	0.039369166
794	FAM174C	1.563043061	1.021899289	2.39074793	0.039410663
795	ACAD8	1.76807555	1.07975416	2.895187873	0.023517206
796	UNC45A	2.509896569	1.372647726	4.589364533	0.002802282
797	RALGAPB	1.915825138	1.135516731	3.232348638	0.014843476
798	YTHDF3	0.503680638	0.29734462	0.853199178	0.01076119
799	NRBF2	0.653040602	0.450703181	0.946214817	0.024311693
800	RAP2A	0.677682274	0.520656087	0.882066445	0.003815174
801	RARRES1	0.678353126	0.527018517	0.873143825	0.002584812
802	MOSPD2	0.670838691	0.470159279	0.957174662	0.027714431
803	ETV1	0.799844553	0.681822426	0.938296078	0.006109083
804	GUCY1A1	0.640235668	0.47362734	0.865451961	0.003736368
805	OPLAH	1.602203687	1.186332299	2.163859702	0.002109524
806	CNOT2	0.503259851	0.315036492	0.803940128	0.004064808
807	CERS2	2.37237777	1.401634609	4.015437582	0.001293321
808	ZNF324B	1.627340424	1.065054438	2.486480279	0.024362806
809	ALS2CL	1.638645103	1.119889903	2.397697995	0.01099044
810	CYBRD1	0.745981649	0.574322825	0.968947422	0.028064229
811	PPP6R3	0.602506241	0.369223501	0.983181648	0.042575516
812	AZI2	0.628076995	0.452062403	0.872624464	0.005570623
813	MKKS	0.675011396	0.463355536	0.983349391	0.040615474
814	APPL1	0.712875911	0.510144036	0.996173685	0.047432346
815	RSF1	0.732399044	0.548772125	0.977470129	0.034455695
816	DERL1	0.484848789	0.247792143	0.948691695	0.034535901
817	MSTO1	1.658752872	1.116591744	2.464160339	0.012207613
818	SPATS2	0.73165173	0.577227459	0.927388753	0.009789167
819	PGP	1.702561791	1.185551689	2.445036079	0.003955294
820	POLR1A	1.942664863	1.174320029	3.21372937	0.009719962
821	BIVM	1.762784544	1.192565854	2.60565011	0.004466085
822	PRTFDC1	0.755388123	0.603611958	0.945327886	0.014236034
823	SCRN3	0.665255068	0.455615785	0.9713542	0.03481904
824	ZNF346	1.807389341	1.136002545	2.875571226	0.012483607
825	EMCN	0.756781667	0.602420569	0.950695446	0.016648448
826	ENPP3	0.787213539	0.641809554	0.965559256	0.021655949
827	CCNL2	1.672396222	1.095565795	2.552935783	0.017177795
828	DNAJB11	1.602623953	1.019441386	2.51942247	0.041014313
829	PIGS	1.46401042	1.106464215	1.937095191	0.007627872
830	IP6K2	1.609625413	1.125009341	2.302997741	0.009201784
831	HACL1	0.629483341	0.41324459	0.958873476	0.031119442
832	ARV1	0.618728553	0.384091606	0.996702391	0.048433827
833	CGN	1.291605659	1.055800855	1.580075609	0.01284991
834	SMOC2	0.660827434	0.506870139	0.861547888	0.002204701
835	CLDN12	0.660824906	0.446981672	0.976974189	0.037825237
836	TLNRD1	1.813348742	1.121017645	2.93325772	0.015286787
837	C11orf54	0.63953728	0.445601164	0.917878959	0.015317524
838	TCF19	1.500057718	1.050274562	2.142461826	0.025768955
839	PRADC1	0.560522966	0.35487438	0.885344258	0.013060243
840	TRPM7	2.354896916	1.269748356	4.367431908	0.006572484
841	MTIF3	0.551799623	0.347598806	0.875960499	0.011681227
842	ABRACL	0.745711732	0.556609374	0.999059688	0.049267632
843	GLIS2	0.701709321	0.507516239	0.970207323	0.032118515
844	ABI3BP	0.764288662	0.617638266	0.945759339	0.013397875
845	CYHR1	1.537380448	1.113594874	2.122440305	0.008952041
846	COG3	2.202026495	1.18436186	4.094120935	0.012606101
847	RAB23	0.714491877	0.51366626	0.993833314	0.045857421
848	CRISPLD1	0.78724277	0.632014441	0.980596548	0.032775264
849	SPRTN	0.603090089	0.373433591	0.97398216	0.038662662
850	CARD11	1.43663291	1.081117953	1.909055449	0.012501826
851	INIP	0.637147564	0.418417576	0.970219803	0.035652196
852	MTRES1	0.584076492	0.356613967	0.956623632	0.032669045
853	SLC25A18	1.259226109	1.00558452	1.576844473	0.044591185
854	ATAD3B	1.87074615	1.169022457	2.993690271	0.009028565
855	CRYGS	1.492472748	1.09922447	2.026405855	0.010280265
856	SLC25A39	1.764519757	1.159628204	2.684938122	0.008014801
857	CNDP1	1.238463329	1.021238719	1.50189313	0.029738911
858	RGS18	0.823303968	0.679030159	0.998231691	0.047932178
859	GBA2	1.575971703	1.081029524	2.297519869	0.018026623
860	RETNLB	1.259942858	1.015791638	1.562777193	0.035506571
861	METTL17	1.751711715	1.033933616	2.967786215	0.037158356
862	INMT	0.785767075	0.631559323	0.977627713	0.030544758
863	NMUR2	1.53143741	1.149423426	2.040414774	0.003600765
864	ACAD9	2.003593492	1.201675397	3.340658292	0.00771471
865	MIOX	1.28185141	1.040902085	1.578575988	0.019422978
866	DLL1	1.494219336	1.088186823	2.051753778	0.013052108
867	TLR4	0.700590977	0.525961765	0.933200376	0.014990844
868	CAPS2	0.802843759	0.680210375	0.947586401	0.009416575
869	VTA1	0.679000744	0.463745946	0.994169361	0.046588337
870	PLPP7	0.739337272	0.601549339	0.908686231	0.004105586
871	RTN4IP1	0.678334584	0.468649103	0.98183866	0.039675776
872	CCDC77	1.699204013	1.016118997	2.841492272	0.043288246
873	COTL1	0.6504176	0.449405789	0.941338686	0.022580317
874	ZNF664	1.604070344	1.005811674	2.558174392	0.047222674
875	SLC44A1	0.737308313	0.551404312	0.985889185	0.039798583
876	MGAT4B	1.966480045	1.104384498	3.50153753	0.021604345
877	C4orf3	0.623360675	0.405724579	0.957739687	0.031003389
878	TBC1D14	1.8358148	1.2007951	2.806653677	0.005034589
879	LENG8	1.262085387	1.04797661	1.519938051	0.014127054
880	AFDN	1.854860521	1.327827156	2.591080876	0.000291745
881	PARP14	1.223844898	1.002362002	1.494266874	0.047353382
882	OTUD5	1.783057625	1.136958037	2.796316479	0.0117672
883	ZMAT2	1.753043478	1.007052659	3.051639266	0.047165281
884	ARF6	0.632380806	0.447841371	0.892962351	0.009240577
885	FAM219B	1.48610661	1.046155496	2.111075138	0.026973873
886	GET4	1.580369939	1.119162515	2.231641168	0.009338805
887	MYLK	0.677641049	0.496322281	0.925200034	0.01431309
888	GPT2	1.460320573	1.067023587	1.998583913	0.018021459
889	ATAD1	0.608859373	0.379883686	0.975850634	0.039252135
890	DIP2B	2.187206064	1.199813557	3.987178124	0.010631766
891	UBFD1	1.603034771	1.028047989	2.499611404	0.037341781
892	YIPF5	0.611808337	0.421133859	0.888813458	0.009922013
893	CFAP36	0.642342013	0.446505544	0.924071979	0.017054026
894	MLLT1	2.212888697	1.269534332	3.857222498	0.005082383
895	TMEM205	2.010092967	1.181623491	3.419425701	0.010005827
896	SMIM20	0.658349151	0.448642723	0.966077421	0.032651881
897	CCDC14	1.51390675	1.065385882	2.151252128	0.020707486
898	IGSF8	1.252453377	1.009191255	1.554353006	0.041052348
899	CHD2	1.523017183	1.097463914	2.113583245	0.011862086
900	CPSF3	0.565368391	0.33086707	0.966072016	0.036957205
901	ZCCHC3	1.813192629	1.052494813	3.123689989	0.03200691
902	ZNF598	1.671267644	1.190972003	2.345257092	0.002968583
903	NAPB	1.788553824	1.082278267	2.955732254	0.023301005
904	SESN3	0.67674029	0.514153724	0.890740257	0.005347889
905	FAM219A	1.748320607	1.038514428	2.943266713	0.035538479
906	SH3D19	0.767478577	0.608960011	0.967261161	0.024964293
907	DNAJC10	0.388530341	0.245716075	0.614350631	5.26E-05
908	TTC14	1.708901205	1.097472045	2.660972861	0.017710639
909	CCAR2	1.354451494	1.00192005	1.831023194	0.048560015
910	RAPH1	0.629197765	0.473052758	0.836883035	0.001454835
911	STRIP1	1.751508247	1.070174925	2.866616538	0.025761694
912	SKIL	0.635033678	0.430359943	0.937047647	0.022165273
913	TMEM259	1.285492351	1.004922194	1.644396544	0.045603189
914	RAB24	1.586515371	1.110340316	2.266900505	0.011251247
915	TMEM63B	1.452973687	1.014085465	2.081809282	0.041730835
916	WWC3	1.408026015	1.085524824	1.826339863	0.009929117
917	ARRDC4	0.625839994	0.449167433	0.872003778	0.005618536
918	CC2D1B	1.706360408	1.121716673	2.595723065	0.012538875
919	BORCS7	0.683038528	0.469364836	0.99398505	0.04642791
920	NCOA7	0.623648688	0.421399286	0.922967122	0.018237608
921	C1QC	1.239213759	1.022664675	1.501617077	0.028621025
922	STK4	2.188399179	1.291926979	3.706936263	0.003585592
923	HIPK2	1.424478427	1.04984142	1.932805042	0.023065151
924	ZNF275	2.016356291	1.353888825	3.002973817	0.000558847
925	BRAT1	1.422672832	1.073277163	1.885811099	0.014215385
926	AGPAT3	1.453700493	1.03699276	2.037859092	0.029951257
927	UBN2	1.906948115	1.256353524	2.89444893	0.002430556
928	FRMD6	0.783261587	0.649026785	0.945259468	0.010868777
929	RDH13	1.639035063	1.041676469	2.578954231	0.032637156
930	PCED1A	1.642887028	1.148529193	2.350029762	0.006564253
931	NOP9	1.689582519	1.096838578	2.602651974	0.017346692
932	SMIM19	0.7486925	0.563240092	0.99520696	0.046256068
933	GINM1	0.681291716	0.467882714	0.992040076	0.045322642
934	PAG1	0.670454954	0.527415786	0.852287432	0.001093065
935	EFHC1	1.461325102	1.069171891	1.997313128	0.017335668
936	POLR3H	1.700936856	1.142172635	2.533055073	0.008943997
937	FAM83D	1.832547966	1.16330554	2.886801388	0.008992007
938	RPTOR	1.509604691	1.01811732	2.23835336	0.040432129
939	ANKRD50	0.516063305	0.357248871	0.745478451	0.000423122
940	ZDHHC8	1.328859946	1.037824538	1.70150993	0.024175072
941	NIPA1	1.570866373	1.031264702	2.392810648	0.035435909
942	ZNF513	1.75214454	1.19316331	2.573001083	0.004225218
943	SAPCD2	1.404679009	1.003090656	1.967043664	0.047937052
944	SLC27A4	1.417350018	1.023091032	1.963540888	0.035973307
945	MSRB3	0.799745534	0.662132152	0.965959614	0.020371009
946	SMDT1	0.579822523	0.375387142	0.895593163	0.01400759
947	JAZF1	0.707930205	0.515092147	0.972962173	0.033262234
948	FAM229B	0.706998594	0.507809776	0.984319396	0.040017135
949	CGNL1	0.816539334	0.692035593	0.963442473	0.016342242
950	ZNF746	1.549203833	1.022098314	2.348142526	0.039115073
951	EPB41L5	1.507448023	1.091295071	2.082296166	0.012774002
952	SLC35F5	0.721968739	0.548923853	0.949564966	0.019799846
953	TYSND1	1.643510013	1.091252934	2.475251227	0.017410531
954	EXOC6B	1.374715379	1.026993219	1.840170253	0.032436962
955	MRPL20.AS1	1.900511139	1.284587943	2.8117519	0.00131293
956	RNF213	1.354959857	1.08412555	1.693453506	0.007587466
957	CCDC137	1.578515609	1.06235128	2.345468561	0.023863071
958	MYO19	1.545441535	1.007868091	2.369744175	0.04594502
959	COA8	0.642896302	0.429007434	0.96342306	0.032313389
960	HID1	1.597884325	1.135135934	2.249276267	0.007220045
961	SELENOM	0.670514123	0.497637788	0.903446642	0.008603983
962	MAP2K7	1.466868234	1.028619866	2.091834398	0.034362259
963	ZKSCAN8	1.537317698	1.090456112	2.167300158	0.014121762
964	NEXN	0.822682248	0.706042476	0.958591168	0.012346275
965	C21orf91	0.710679778	0.509909099	0.990501539	0.043767779
966	SGCB	0.616603372	0.403397104	0.942494911	0.025513534
967	TBC1D25	1.582833327	1.082830091	2.313716031	0.017749505
968	SLC25A37	1.455005305	1.06932243	1.979796156	0.017009521
969	VARS2	1.640059214	1.078825312	2.493262065	0.020613236
970	MAFK	1.544725573	1.056725738	2.258085529	0.024781413
971	COL8A1	0.841767466	0.747635033	0.947751824	0.004415188
972	ZNRF2	0.587404948	0.425673888	0.810584305	0.001203545
973	SVIP	0.853931017	0.729748983	0.99924522	0.048909342
974	ALS2	1.943257699	1.066235268	3.541667207	0.03005357
975	KLF16	1.278409616	1.063669465	1.536502833	0.008848836
976	AHSA2P	1.337264997	1.0261214	1.742754484	0.031492387
977	USP19	1.818908959	1.146623773	2.885366482	0.011049004
978	SFXN5	1.695154435	1.090797682	2.634355214	0.018958864
979	ARL14EP	0.458800757	0.258049388	0.81572809	0.007962553
980	BRAF	1.57280953	1.012749642	2.4425877	0.043761
981	RELL1	0.612726275	0.414314349	0.906156133	0.014144874
982	RNF157	1.32032434	1.021160877	1.707131953	0.034031455
983	PIK3AP1	0.444882504	0.2670505	0.74113489	0.001868332
984	KCTD18	0.509423279	0.291496194	0.89027604	0.01788391
985	MAVS	1.331578347	1.019243107	1.739625103	0.035753457
986	ZCCHC7	0.52231055	0.362379514	0.75282487	0.000497343
987	ABRAXAS1	0.693508466	0.494916395	0.971788361	0.033485392
988	STK17B	0.462193255	0.305033867	0.70032422	0.000272622
989	IER5L	0.79138157	0.635573932	0.985384639	0.036476133
990	CHTF18	1.70944562	1.185497317	2.464960728	0.004089395
991	CWC22	0.417346643	0.221810318	0.785257522	0.006737473
992	FHDC1	1.437384977	1.024537214	2.016593975	0.03570352
993	PABPC1L	1.279445578	1.037343223	1.578051461	0.021305341
994	NAPRT	1.353109271	1.002445162	1.82643876	0.0481637
995	FOXK1	2.036222256	1.126295569	3.681272653	0.018591767
996	PRR12	1.553799744	1.153003027	2.093917872	0.003788055
997	SVBP	0.615057729	0.407194723	0.929029748	0.020899119
998	LYSMD2	0.703843476	0.517500379	0.957285558	0.025210332
999	CNRIP1	0.683380398	0.503869153	0.926845326	0.014342415
1000	PPM1K	1.711325311	1.058610687	2.766488527	0.028351704
1001	FITM2	1.78374264	1.028631881	3.093174407	0.039353262
1002	SUMF1	0.527470242	0.335906692	0.828280184	0.005465043
1003	LYPLAL1	0.588027193	0.398467677	0.867764187	0.007487943
1004	ATG4D	2.482071655	1.330829195	4.6292039	0.004254075
1005	XXYLT1	0.836693535	0.706889196	0.990333528	0.038182192
1006	LRIG3	0.80982286	0.678944708	0.965930004	0.019007558
1007	SGMS2	0.777327885	0.62929918	0.960177067	0.019439861
1008	SMIM14	0.807496951	0.653108492	0.998381331	0.048276427
1009	GPC6	0.843461341	0.74012725	0.961222592	0.010677575
1010	GLT8D2	0.799687728	0.677924701	0.943320787	0.007994818
1011	CCDC18.AS1	1.270196276	1.017648229	1.585418745	0.034460612
1012	USP36	1.578650462	1.034423794	2.409203361	0.034269701
1013	ECE2	1.564016044	1.008294665	2.426023137	0.045842133
1014	STARD9	1.397018161	1.009863656	1.932597268	0.043461911
1015	RASSF3	0.38252845	0.215993584	0.677464639	0.000983235
1016	SPINDOC	1.463546898	1.051482354	2.037095074	0.023975304
1017	IKBIP	0.633511763	0.416596654	0.963371046	0.032805631
1018	TMEM119	0.804062012	0.682821227	0.946830142	0.008919153
1019	ZNF740	1.419076693	1.036898857	1.942116771	0.028793621
1020	HS3ST3B1	0.775944216	0.623242176	0.966060145	0.023281616
1021	CRACR2B	1.395891808	1.064190518	1.830982241	0.01597918
1022	PCF11	1.515093543	1.020470182	2.249461558	0.039354998
1023	EPG5	1.983011264	1.163385957	3.380076619	0.01186405
1024	MROH6	1.306599875	1.014492818	1.682814509	0.03832002
1025	ATAD3A	1.617895266	1.053660163	2.484278312	0.027888667
1026	TCEAL7	0.701713352	0.561452569	0.877013759	0.001849519
1027	SPIRE2	1.372407209	1.018373693	1.849519052	0.037565186
1028	RNF139.AS1	1.285860742	1.000979166	1.651820441	0.049111434
1029	CCDC57	0.611221154	0.420486172	0.888474639	0.009892173
1030	MIRLET7D	1.318334605	1.038129921	1.674170155	0.023395863
1031	ENPP5	0.754362221	0.611412968	0.930733221	0.008548449
1032	ARHGAP39	1.34555009	1.024120897	1.767862613	0.033080841
1033	ZNF343	1.775448453	1.046001673	3.01358716	0.033455557
1034	VPS13A	1.598778129	1.122623198	2.276891756	0.009291172
1035	ARID3A	1.412339757	1.0213478	1.9530111	0.036825411
1036	SLC35F1	1.656841977	1.191456546	2.304007936	0.002689022
1037	CRACDL	0.783449819	0.624972778	0.982112565	0.034302642
1038	RSPO3	0.62369812	0.429328664	0.906064228	0.01322367
1039	IFTAP	0.663113426	0.457643045	0.960834916	0.029922673
1040	RHPN1	1.478845774	1.077293756	2.030072867	0.015496334
1041	MSC.AS1	0.755117075	0.596083183	0.956580916	0.019920005
1042	KMT5A	1.603128379	1.085005312	2.368670984	0.017808206
1043	GAN	1.478753995	1.006933658	2.17165586	0.046020512
1044	FAM221A	0.752016297	0.586887959	0.963605578	0.024256225
1045	CYYR1	0.650229934	0.47836706	0.883837961	0.005988051
1046	HELQ	0.556394959	0.353036075	0.876894379	0.011538134
1047	SEC61A2	1.469338813	1.084549909	1.990647485	0.012996578
1048	LFNG	1.220749408	1.021417791	1.458980968	0.028311105
1049	ZSCAN22	1.707349073	1.117300765	2.60900283	0.013411668
1050	STYX	0.607651474	0.422439438	0.874066862	0.007240022
1051	NUDT7	0.707159545	0.536494779	0.932114611	0.013939348
1052	FAM162B	0.75025472	0.571292302	0.985278715	0.038769056
1053	NAT8L	1.565211731	1.140263174	2.148528356	0.005569093
1054	ZBTB8OS	0.629764961	0.423547987	0.93638482	0.022328981
1055	PPP1R3E	1.381398732	1.013153009	1.883488909	0.04109468
1056	DIPK1B	1.51728719	1.075093929	2.14135747	0.017697074
1057	METTL25	0.647461386	0.426548119	0.982787704	0.041200811
1058	ANKRD16	1.604138358	1.02527442	2.509825488	0.038522217
1059	PCGF5	0.74081209	0.548995833	0.99964794	0.049731394
1060	DUSP28	0.585960705	0.351597164	0.976543565	0.040262489
1061	RIMKLB	1.627929625	1.144313828	2.31593362	0.00673853
1062	MARCHF1	0.598818533	0.425907213	0.841929005	0.003181104
1063	PNCK	1.259068066	1.007026518	1.574191311	0.043238092
1064	TRIM66	1.518498212	1.061184009	2.172890658	0.022325805
1065	MAMDC4	1.23646593	1.030744378	1.483246506	0.022248022
1066	SLC9B2	1.932813318	1.336942069	2.794262677	0.000458207
1067	INKA1	0.703249478	0.55389697	0.892873323	0.00384963
1068	DISP2	1.237970316	1.004424022	1.525820243	0.045354848
1069	ADAMTSL1	0.825788476	0.68525026	0.995149722	0.044320645
1070	CHCHD4	1.898631742	1.087097473	3.315988292	0.024227992
1071	DCLK1	0.613695463	0.444336777	0.847605109	0.003041516
1072	CCN4	0.704481236	0.531589939	0.933602718	0.014761796
1073	KCTD21	0.788170677	0.630277058	0.985618957	0.036891609
1074	UNKL	1.349661731	1.014790618	1.795037082	0.039315027
1075	GDNF	1.283453928	1.015078671	1.622784551	0.037068908
1076	SERTAD4.AS1	0.728059353	0.595927858	0.889487569	0.001895652
1077	RNF165	1.674037038	1.123562449	2.494209385	0.011320781
1078	F2RL2	0.818258568	0.694846709	0.963589631	0.01618954
1079	CFAP44	1.593501913	1.120852158	2.265462335	0.009445279
1080	FLJ46875	1.713937195	1.200455754	2.447054544	0.003021232
1081	GLIS3	0.700650586	0.582691084	0.842489712	0.000155473
1082	CFAP206	0.777292081	0.621272979	0.972491962	0.027525916
1083	SBNO1	1.838452627	1.184245067	2.854061339	0.006656679
1084	KNDC1	1.494132587	1.075160625	2.076370855	0.016775422
1085	STXBP6	0.817174634	0.72428339	0.921979424	0.001040401
1086	WNT9A	1.411801074	1.087510224	1.832794053	0.009597675
1087	HOXA11.AS	1.358339824	1.031832809	1.788164771	0.029008989
1088	PKHD1L1	0.89119559	0.796249552	0.997463142	0.045053181
1089	TUBB1	1.396957367	1.092869035	1.785657588	0.007608121
1090	HOXB.AS3	1.344252052	1.038915376	1.739327014	0.024425493
1091	ST8SIA4	0.700269458	0.512552711	0.956735383	0.02523741
1092	PRMT8	1.584448109	1.163847038	2.15704962	0.003456475
1093	CMTM5	1.327813054	1.05765483	1.666978163	0.014568714
1094	DDX19B	0.686001891	0.5341151	0.881080866	0.003162665
1095	CFAP126	0.728030998	0.57215543	0.926372635	0.009819822
1096	SPATA46	1.25448802	1.0067327	1.563215533	0.043410429
1097	POM121L10P	1.309038318	1.015123811	1.688051545	0.037925126
1098	GGN	0.810619211	0.661220465	0.993773696	0.043377543
1099	RYR3.DT	1.275437102	1.013255978	1.605457886	0.038253768
1100	ELFN1.AS1	1.588926715	1.074285818	2.350108384	0.020406719
1101	PRRX2.AS1	1.760800773	1.173482164	2.642067733	0.006282913
1102	TEX33	1.395187061	1.121160325	1.736189636	0.002835326
1103	AARS2	1.761605121	1.120324112	2.769959666	0.014207502
1104	ANKRD54	1.641201665	1.019300137	2.642541493	0.04148748
1105	DCAF17	1.492521396	1.094654425	2.034998504	0.01135086
1106	ZNF658	0.76674897	0.612468193	0.959893084	0.02050001
1107	ZKSCAN2	1.411486653	1.042858811	1.910416395	0.025634138
1108	CCDC102A	0.767986769	0.65852361	0.895645454	0.000766276
1109	HECW2	0.508410311	0.355545764	0.726997957	0.000209503
1110	FOXP1.IT1	1.544783071	1.038341154	2.298237654	0.031905536
1111	ARF1	1.333529313	1.051520996	1.691169682	0.017577971
1112	ISLR2	1.308798303	1.027865944	1.666514011	0.029042476
1113	HM13	1.642828165	1.121680794	2.406107329	0.010779837
1114	USP21	1.867231645	1.200957406	2.903145438	0.005550994
1115	ADGRD1	0.763254559	0.641675726	0.907869034	0.002274835
1116	LYSMD1	1.490268648	1.080601325	2.055245159	0.014989781
1117	ADIRF.AS1	1.395889208	1.034496884	1.883530738	0.029122604
1118	KIAA1614.AS1	1.455533052	1.044205855	2.028887748	0.026743525
1119	ZNF431	1.545506287	1.050061034	2.274715095	0.027266978
1120	CCDC150	1.353085969	1.030879765	1.775999201	0.029322063
1121	A1BG.AS1	1.255979552	1.007236094	1.566151812	0.042970944
1122	MIRLET7BHG	1.352960648	1.035090254	1.768447252	0.026940992
1123	CYP8B1	1.447546303	1.055542582	1.985130997	0.021708399
1124	PDE4DIPP2	0.786203474	0.639103142	0.967161421	0.022852902
1125	BPIFB2	1.281813396	1.010035251	1.626721029	0.041142255
1126	PITPNM2	1.300266923	1.006994868	1.678950037	0.044071016
1127	NAV2.AS4	1.367217522	1.065979352	1.753583452	0.013772993
1128	ATP13A4	1.284640344	1.006792036	1.639167529	0.043967315
1129	CWF19L1	1.495399047	1.115159427	2.005290235	0.007186064
1130	PPP4R3B	0.621603247	0.393083954	0.982972196	0.042010559
1131	HYPK	1.556535745	1.004141647	2.412810517	0.047878543
1132	GSDMC	1.623445331	1.036069234	2.543821065	0.034464112
1133	OR14J1	1.344652273	1.019132628	1.774145667	0.036262402
1134	ITPK1.AS1	1.521777656	1.052745767	2.199778244	0.025524255
1135	SEPTIN7P13	1.236244503	1.025093548	1.490888781	0.026465106
1136	OR51B5	1.837072029	1.215973665	2.775416718	0.003867216
1137	OR51M1	1.300180426	1.061173147	1.593019146	0.011313341
1138	PHRF1	1.281373264	1.00651838	1.631284111	0.044145326
1139	TC2N	0.846135939	0.718643608	0.99624629	0.044952609
1140	SLC38A5	1.425347542	1.162373153	1.747817049	0.000659439
1141	TLCD4	1.214112198	1.047584949	1.407111118	0.00994957
1142	ZNF792	0.624738131	0.497271531	0.784878498	5.34E-05
1143	PEX13	0.650492818	0.437796523	0.966524135	0.03329594
1144	SBSN	1.350519142	1.106505651	1.648344001	0.003123173
1145	GABPB1.AS1	1.354984636	1.031042666	1.780705517	0.029312007
1146	GXYLT2	0.617606918	0.473962803	0.80478532	0.000359822
1147	SNORD89	1.45705571	1.046982398	2.027743109	0.025599636
1148	MIR34A	1.399239415	1.013065124	1.932621008	0.04147575
1149	PGGT1B	0.617617211	0.391945069	0.973225715	0.037807619
1150	CDHR3	1.248489633	1.047330495	1.488285095	0.013291596
1151	ZNF514	1.497665964	1.096161842	2.046233735	0.011194531
1152	PNMA6A	1.312837679	1.122250979	1.535790839	0.000671048
1153	TMEM184A	1.323103118	1.028580378	1.701959221	0.029308771
1154	P2RY12	0.843022272	0.747881645	0.950266069	0.005191349
1155	SFR1	0.669439279	0.470263048	0.952975043	0.025928085
1156	KDF1	0.785489256	0.654692999	0.942416328	0.009372396
1157	ODF3L1	1.297714099	1.035444631	1.626414229	0.023676704
1158	SHH	1.420771595	1.043705003	1.934063667	0.025628052
1159	CDKN2B	0.757002654	0.621664608	0.921804155	0.005602522
1160	TMED6	0.781929834	0.633658622	0.964895362	0.021843036
1161	DEGS2	1.233449905	1.010661717	1.505349063	0.038988702
1162	FBXO36	0.755052382	0.61103386	0.933015561	0.009266419
1163	ATP1A1.AS1	0.807582474	0.659147285	0.989444192	0.03917229
1164	C8orf48	0.69911522	0.576792505	0.847379406	0.000264727
1165	ADCY10P1	1.50280975	1.107965961	2.038363293	0.008813215
1166	EVPLL	1.620859182	1.119353572	2.34705508	0.010560967
1167	C2orf49.DT	1.37270633	1.056403351	1.783715155	0.017760709
1168	HOXB.AS1	1.365142235	1.035332073	1.80001506	0.027379852
1169	SLC5A11	0.697232874	0.526044493	0.924130347	0.012111797
1170	GABRG3.AS1	1.365788185	1.011262139	1.844603189	0.042052415
1171	BSND	1.635824617	1.181862094	2.264157715	0.003002701
1172	CRNDE	0.874143435	0.780145045	0.979467536	0.020482811
1173	DYNLRB2	0.733357914	0.603506188	0.891148824	0.001814545
1174	GK5	1.701932638	1.192737593	2.428509609	0.003371706
1175	USP6NL	0.563420502	0.356838652	0.88959719	0.013817465
1176	SPDYA	1.284099986	1.024107588	1.610097213	0.030285327
1177	SEZ6L2	1.495292764	1.007271221	2.219760083	0.045944183
1178	TMEM71	0.839198461	0.712753937	0.988074593	0.035383151
1179	SLFN5	0.733212446	0.576114465	0.933148747	0.011656877
1180	DBF4B	1.537153203	1.021539383	2.313018967	0.03919048
1181	CBFA2T2	1.344987633	1.032632143	1.751825899	0.027941081
1182	C11orf80	1.328567163	1.029944557	1.713772547	0.028735011
1183	GCNA	1.614127213	1.090873877	2.388366532	0.016617804
1184	ZNF681	0.845285512	0.736688924	0.969890511	0.016587777
1185	C2orf69	0.596407319	0.387382368	0.918218585	0.018900172
1186	H2AC15	1.553383632	1.181780913	2.04183422	0.001592555
1187	LSMEM1	1.371236192	1.086943437	1.729886422	0.007739216
1188	KLHL31	1.250905344	1.006091538	1.555290072	0.043944866
1189	FAM83A	1.441252017	1.001965732	2.073132153	0.048775228
1190	C12orf77	0.855471735	0.738758119	0.990624496	0.03699403
1191	FHAD1.AS1	1.379403828	1.088707715	1.747718779	0.007725351
1192	ZNF341	1.472814026	1.09338917	1.983905836	0.010853207
1193	ERICH6	1.220462748	1.008026552	1.477668736	0.041161519
1194	INSM2	1.375436818	1.070412467	1.767380798	0.012707177
1195	GSG1	1.234190799	1.006280675	1.513719746	0.043375879
1196	WDR4	1.469837786	1.053041775	2.05160248	0.023590719
1197	PXDNL	0.798870706	0.692577742	0.921476921	0.002052364
1198	ZNF674.AS1	1.273738361	1.009003746	1.607932	0.041814091
1199	FTX	1.351142783	1.000664099	1.824375256	0.049495648
1200	MATR3	1.285625985	1.02851124	1.607016151	0.027321191
1201	MFSD4B	1.442176797	1.052726572	1.975701923	0.022612945
1202	POTEM	1.288861512	1.007584118	1.648660361	0.043371837
1203	NOMO3	1.511935851	1.190728525	1.919791095	0.000692414
1204	RDH12	1.217490118	1.003095492	1.477707955	0.046454795
1205	PAN3.AS1	1.473836654	1.068456941	2.033020144	0.018106078
1206	TEX9	0.824156739	0.729064673	0.931651683	0.001989634
1207	ACTL9	1.233234418	1.034171159	1.470614527	0.019592732
1208	FBLL1	1.394503707	1.098360011	1.770494711	0.006328854
1209	ANKRD53	1.287369859	1.016485106	1.630443126	0.036116674
1210	GDPD5	0.798499713	0.643744716	0.990457516	0.040638783
1211	HMGXB3	1.795910252	1.118380662	2.883896104	0.015395033
1212	CUL7	1.491224141	1.051527607	2.11477989	0.024971339
1213	TAZ	1.518314856	1.038876548	2.219012458	0.031008686
1214	CD22	0.802675321	0.647695632	0.994738328	0.044626069
1215	DNPH1	1.733841567	1.025750307	2.930739145	0.039889132
1216	CELSR3	1.29996803	1.002592326	1.685547392	0.047759828
1217	LPCAT4	1.420079303	1.06634728	1.891152407	0.01641893
1218	ATN1	1.274296686	1.038660942	1.563389918	0.020147934
1219	SCYL3	0.659931243	0.444820538	0.979067307	0.038915849
1220	STK11	1.399620452	1.028464466	1.904720557	0.032476969
1221	OGFOD2	1.879736529	1.069711796	3.303141494	0.028216986
1222	SIGLEC1	1.605360565	1.27158863	2.026742361	6.88E-05
1223	C20orf27	1.406622331	1.077026526	1.837082315	0.012255578
1224	ZMIZ2	1.488613688	1.015384877	2.182394836	0.041531802
1225	CACFD1	1.626486534	1.02398384	2.583496283	0.039364712
1226	GSK3A	1.469592189	1.019083423	2.119258497	0.039286622
1227	ENGASE	1.590737262	1.042078613	2.428266932	0.031479907
